# Supplementary material for: The Telomere-Telomerase System Is Detrimental to Health at High-Altitude
Source: MDPI journal article supplement (doi:10.3390/ijerph20031935), 2023-01-20
Supplement: s1 [file s1]

|                                                | Gene            | SNP         | Observed alleles | Alleles as on forward strand |
|------------------------------------------------|-----------------|-------------|------------------|------------------------------|
| <b>Haplotype 1</b><br><i>TERF1</i>             | <i>TERF1</i>    | rs2929589   | C/T              | G/A                          |
|                                                |                 | rs2975843   | T/C              | A/G                          |
|                                                |                 | rs2929586   | T/C              | A/G                          |
|                                                |                 | rs10099824  | G/A              | G/A                          |
| <b>Haplotype 2</b><br><i>POT1</i>              | <i>POT1</i>     | rs727505    | C/T              | G/A                          |
|                                                |                 | rs17246404  | C/T              | C/T                          |
|                                                |                 | rs7794637   | C/T              | C/T                          |
|                                                |                 | rs116916706 | C/A              | C/A                          |
|                                                |                 | rs4360236   | C/T              | C/T                          |
|                                                |                 | rs7782410   | G/A              | G/A                          |
|                                                |                 | rs10244797  | T/C              | T/C                          |
| <b>Haplotype 3</b><br><i>ACD+TERF2+TERF2IP</i> | <i>ACD</i>      | rs72556537  | T/A              | A/T                          |
|                                                |                 | rs6979      | G/A              | G/A                          |
|                                                | <i>TERF2</i>    | rs3785073   | G/A              | G/A                          |
|                                                |                 | rs8061352   | T/A              | T/A                          |
|                                                |                 | rs153058    | T/C              | A/G                          |
|                                                |                 | rs113062367 | T/C              | T/C                          |
|                                                |                 | rs4783704   | C/T              | C/T                          |
|                                                | <i>TERF2IP</i>  | rs76937292  | C/T              | C/T                          |
|                                                |                 | rs59297469  | G/T              | G/T                          |
|                                                |                 | rs2233810   | C/A              | C/A                          |
|                                                |                 | rs4888444   | A/G              | A/G                          |
| <b>Haplotype 4</b><br><i>TERT</i>              | <i>TERT</i>     | rs2736122   | C/T              | G/A                          |
|                                                |                 | rs2075786   | T/C              | A/G                          |
|                                                |                 | rs4246742   | A/T              | T/A                          |
|                                                |                 | rs10069690  | C/T              | C/T                          |
|                                                |                 | rs2242652   | C/T              | G/A                          |
|                                                |                 | rs2853676   | G/A              | C/T                          |
|                                                |                 | rs2736098   | A/G              | T/C                          |
|                                                |                 | rs2853669   | C/T              | G/A                          |
|                                                |                 | rs7712562   | G/A              | G/A                          |
| <b>Haplotype 5</b><br><i>TEP1+HSP90AA1</i>     | <i>TEP1</i>     | rs2104978   | A/G              | T/C                          |
|                                                |                 | rs1713449   | C/T              | C/T                          |
|                                                |                 | rs2228041   | G/A              | C/T                          |
|                                                |                 | rs2228036   | G/T              | C/A                          |
|                                                |                 | rs1760898   | C/A              | G/T                          |
|                                                |                 | rs1760897   | T/C              | A/G                          |
|                                                |                 | rs2184282   | A/G              | T/C                          |
|                                                |                 | rs4246977   | T/C              | T/C                          |
|                                                |                 | rs75932631  | T/C              | T/C                          |
|                                                | <i>HSP90AA1</i> | rs8005905   | A/T              | A/T                          |

Supplementary Figure S1: Position of each SNP and allele conversion followed in the haplotypes. SNPs are arranged according to contig position.

**A**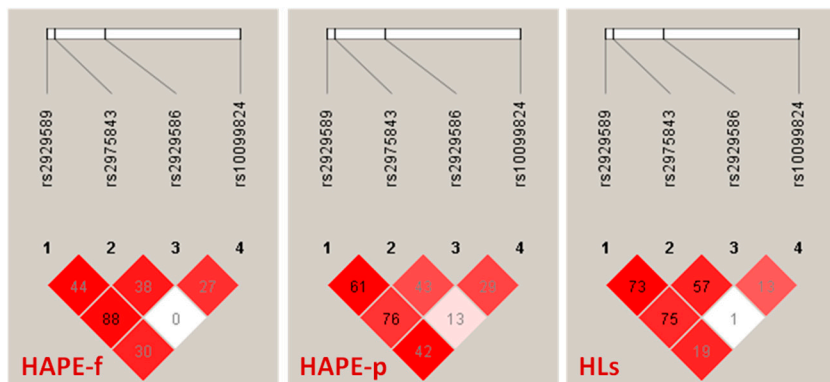**B**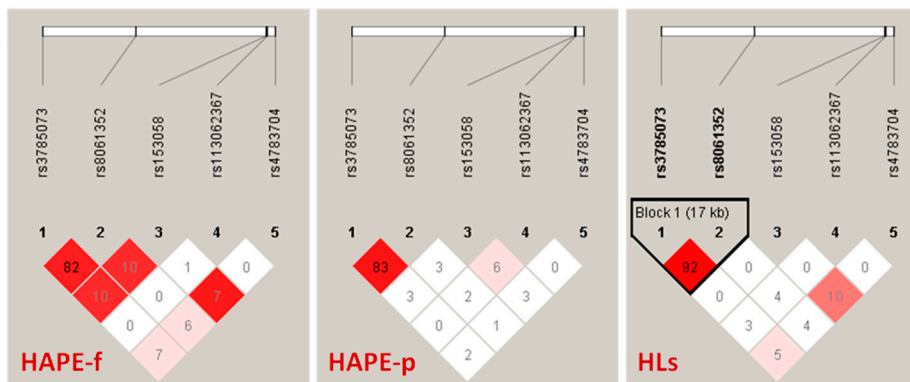**C**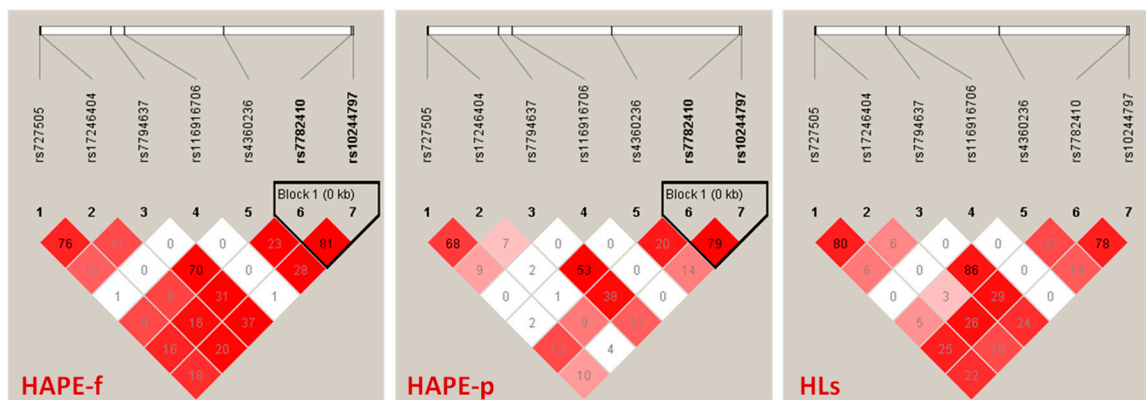**D**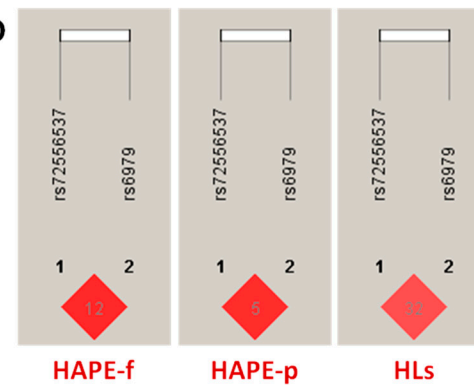

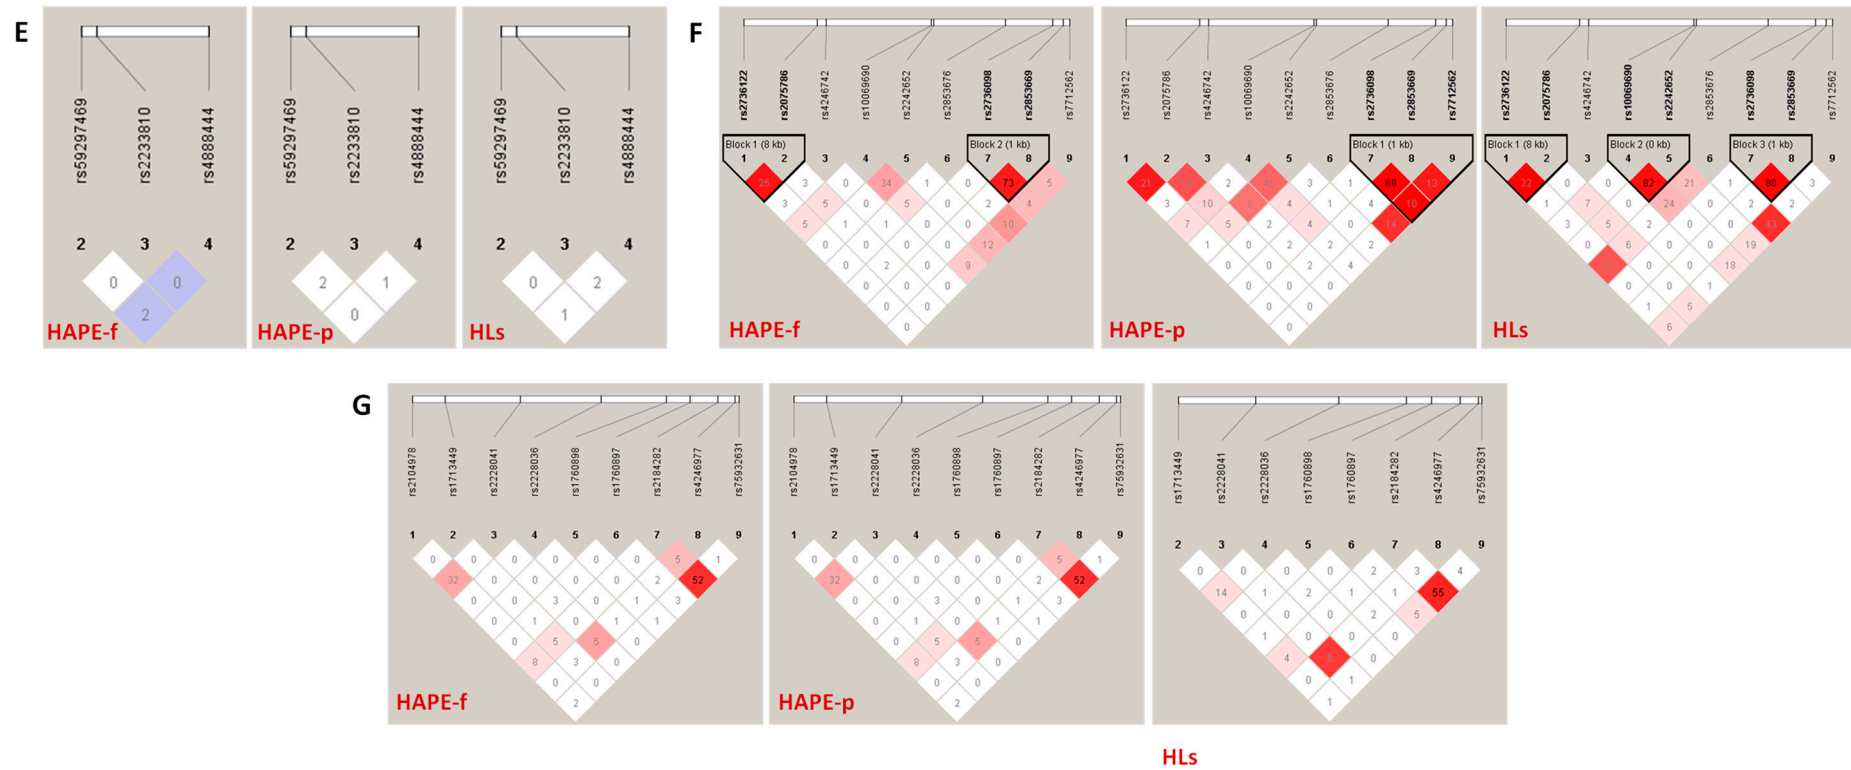

Supplementary Figure S2: Linkage disequilibrium plots of (A) *TERF1*, (B) *TERF2*, (C) *POT1*, (D) *ACD*, (E) *TERF2IP*, (F) *TERT*, and (G) *TEP1*. SNPs were arranged according to the contig position. Standard ( $D'$ /LOD) color scheme was kept for the LD plot. The values in the boxes represent the  $r^2$  values. HAPE-f, HAPE-free; HAPE-p, HAPE-patients; HLs, highlanders; *TERF1*, telomeric repeat binding factor 1; *TERF2*, telomeric repeat binding factor 2; *POT1*, protection of telomere 1; *ACD*, ACD shelterin complex subunit and telomerase recruitment factor; *TERF2IP*, TERF2-interacting protein; *TERT*, telomerase reverse transcriptase; *TEP1*, telomerase associated protein 1.
