# Supplementary material for: The Telomere-Telomerase System Is Detrimental to Health at High-Altitude
Source: MDPI journal article supplement (doi:10.3390/ijerph20031935), 2023-01-20
Supplement: s1 [file s1]

Supplementary Table S1: Clinical characteristics of the three study groups

| Clinical characteristics | HAPE-f<br>(n=210) | HAPE-p<br>(n=183) | HLs<br>(n=200) | P value                  |                  |                          |
|--------------------------|-------------------|-------------------|----------------|--------------------------|------------------|--------------------------|
|                          |                   |                   |                | HAPE-p<br>vs HAPE-f      | HLs vs<br>HAPE-f | HAPE-p<br>vs HLs         |
| Age, years               | 26.5±7.4          | 34.8±8.8          | 39.2±10.7      | <0.001                   | <0.001           | <0.001                   |
| Gender                   | M = 203 (97%)     | M = 156 (85%)     | M = 53 (26%)   | <0.001                   | <0.001           | <0.001                   |
|                          | F = 7 (3%)        | F = 27 (15%)      | F = 147 (74%)  |                          |                  |                          |
| BMI, kg/m <sup>2</sup>   | 19.7±2.9          | 25.7±5.0          | 21.2±3.4       | <0.001                   | <0.001           | <0.001                   |
| SBP, mmHg                | 120.1±13.6        | 122.8±13.1        | 119.3±14.5     | 0.004                    | 0.056            | 0.369                    |
| DBP, mmHg                | 80.8±9.9          | 83.6±11.6         | 76.1±10.5      | 0.602                    | 0.0004           | 1.81 × 10 <sup>-5</sup>  |
| MAP, mmHg                | 93.9±10.4         | 96.7±10.6         | 90.5±11.0      | 0.117                    | 0.002            | 0.001                    |
| SaO <sub>2</sub> , %     | 90.1±7.1          | 70.8±9.4          | 87.7±3.9       | 3.60 × 10 <sup>-43</sup> | 0.235            | 3.86 × 10 <sup>-46</sup> |

The data are represented as mean±SD (standard deviation) and gender is represented as number of samples (percentage). Unpaired Student's t-test was used to compare age, gender, and BMI between any two groups using Epi Info™ ver. 6. General linear model was used to compare SBP, DBP, MAP and SaO<sub>2</sub> between the two groups after adjusting with age, gender, and BMI using SPSS 16.0. A P value of ≤0.05 was considered statistically significant. n, number of samples; M, male; F, female; BMI, body mass index; SBP, systolic blood pressure; DBP, diastolic blood pressure; MAP, mean arterial pressure; SaO<sub>2</sub>, arterial oxygen saturation.

Supplementary Table S2: Position of the selected SNPs on the genes

| Gene            | SNPs     |       |       |        |          |                      |
|-----------------|----------|-------|-------|--------|----------|----------------------|
|                 | Promoter | 5'UTR | 3'UTR | Exonic | Intronic | Total number of SNPs |
| <i>TERF1</i>    | 2        | -     | 1     | 1      | 2        | 6                    |
| <i>TERF2</i>    | 3        | -     | -     | -      | 2        | 5                    |
| <i>POT1</i>     | 2        | -     | 2     | 1      | 2        | 7                    |
| <i>TINF2</i>    | 2        | -     | -     | -      | -        | 2                    |
| <i>ACD</i>      | 1        | -     | 1     | 2      | -        | 4                    |
| <i>TERF2IP</i>  | 4        | 1     | -     | 1      | -        | 6                    |
| <i>TERC</i>     | -        | -     | -     | 2      | -        | 2                    |
| <i>TERT</i>     | 6        | -     | -     | 4      | 6        | 16                   |
| <i>TEP1</i>     | 2        | -     | -     | 6      | 1        | 9                    |
| <i>HSP90AA1</i> | 1        | -     | 2     | 2      | -        | 5                    |
| <i>PTGES3</i>   | 2        | -     | 1     | -      | -        | 3                    |

Supplementary Table S3: qRT-PCR primers for gene expression profiling

| Gene            | Forward Primer                | Reverse Primer                 |
|-----------------|-------------------------------|--------------------------------|
| <i>TERF1</i>    | 5' GCAGAATACCTGTTTCAAAGAG 3'  | 5' GTTCCCTCTCCATATTTTCCT 3'    |
| <i>TERF2</i>    | 5' ATATGAGACCTTCCAGCAG 3'     | 5' TTCCTTCCCTGTACTTGAG 3'      |
| <i>POT1</i>     | 5' GATTTAAGTCACATCCATCGG 3'   | 5' GAAAGCTTCCAACCTTCAG 3'      |
| <i>TINF2</i>    | 5' GAGAAAGCACTGCCTACAC 3'     | 5' TCCACACCATATTGTCTCCA 3'     |
| <i>ACD</i>      | 5' TGGAGTTCAAGGAGTTTGTAG 3'   | 5' GTGGCTCATACTCATACTGGA 3'    |
| <i>TERF2IP</i>  | 5' CCAGATTTGCCTGAAGAAGAG 3'   | 5' CTCTCATCCACCACAACCT 3'      |
| <i>TERT</i>     | 5' GAATCAGACAGCACTTGAAGAG 3'  | 5' GTAGTCCATGTTTACAATCGG 3'    |
| <i>TERC</i>     | 5' TAACTGAGAAGGGCGTAGG 3'     | 5' TTGCTCTAGAATGAACGGTG 3'     |
| <i>TEP1</i>     | 5' CGGAAATTTGAGTCTTCACCT 3'   | 5' GCCAAGATGAGAAAGTGACC 3'     |
| <i>HSP90AA1</i> | 5' AGATAAACCTGACCATTCC 3'     | 5' CTTCAATCAATACCCAGACCA 3'    |
| <i>PTGES3</i>   | 5' GATCCAAATGATTCCAAGCA 3'    | 5' TCTGAATCATCTTCCCAGTC 3'     |
| <i>RN18S1</i>   | 5' - GCTTAATTTGACTCAACAC - 3' | 5' - AGCTATCAATCTGTCAAT C - 3' |

All the primers were designed to work at 60°C annealing temperature.

Supplementary Table S4: Genotype and allele distribution of 4 SNPs of *TERF1*

[A] Comparison of genotype and allele distribution among HAPE-f, HAPE-p and HLs.

| <i>TERF1</i> |               |                     |                   |                   |                |                  |                  |                       |                    |                       |                   |
|--------------|---------------|---------------------|-------------------|-------------------|----------------|------------------|------------------|-----------------------|--------------------|-----------------------|-------------------|
| SNP          | Genetic Model | Genotype/<br>Allele | HAPE-f<br>(n=210) | HAPE-p<br>(n=183) | HLs<br>(n=200) | HAPE-p vs HAPE-f |                  | HLs vs HAPE-f         |                    | HAPE-p vs HLs         |                   |
|              |               |                     |                   |                   |                | p value          | OR (95%CI)       | p value               | OR (95%CI)         | p value               | OR (95%CI)        |
| rs2929589    | Codominant    | CC                  | 75 (35.7%)        | 60 (32.8%)        | 15 (7.5%)      | Ref              | -                | Ref                   | -                  | Ref                   | -                 |
|              |               | CT                  | 101 (48.1%)       | 83 (45.4%)        | 89 (44.5%)     | 0.975            | 0.99 (0.60-1.65) | 0.005                 | 4.15 (1.52-11.31)  | 0.002                 | 0.31 (0.14-0.66)  |
|              |               | TT                  | 34 (16.2%)        | 40 (21.9%)        | 96 (48.0%)     | 0.180            | 1.54 (0.82-2.92) | $5.90 \times 10^{-6}$ | 10.83 (3.86-30.35) | $1.48 \times 10^{-6}$ | 0.13 (0.06-0.30)  |
|              | Additive      | C                   | 251 (59.8%)       | 203 (55.5%)       | 119 (29.8%)    | Ref              | -                | Ref                   | -                  | Ref                   | -                 |
|              |               | T                   | 169 (40.2%)       | 163 (44.5%)       | 281 (70.2%)    | 0.227            | 1.22 (0.88-1.68) | $1.66 \times 10^{-6}$ | 3.27 (2.01-5.31)   | $1.94 \times 10^{-7}$ | 0.38 (0.26-0.54)  |
|              | Dominant      | CC                  | 75 (35.7%)        | 60 (32.8%)        | 15 (7.5%)      | Ref              | -                | Ref                   | -                  | Ref                   | -                 |
|              |               | CT+TT               | 135 (64.3%)       | 123 (67.2%)       | 185 (92.5%)    | 0.608            | 1.13 (0.70-1.82) | $2.13 \times 10^{-4}$ | 6.69 (2.45-18.30)  | $4.22 \times 10^{-5}$ | 0.22 (0.11-0.45)  |
|              | Recessive     | CC+CT               | 176 (83.8%)       | 143 (78.1%)       | 104 (52.0%)    | Ref              | -                | Ref                   | -                  | Ref                   | -                 |
|              |               | TT                  | 34 (16.2%)        | 40 (21.9%)        | 96 (48.0%)     | 0.125            | 1.57 (0.88-2.80) | $9.05 \times 10^{-5}$ | 4.19 (2.04-8.58)   | $3.74 \times 10^{-5}$ | 0.32 (0.18-0.55)  |
|              | Overdominant  | CC+TT               | 109 (51.9%)       | 100 (54.6%)       | 111 (55.5%)    | Ref              | -                | Ref                   | -                  | Ref                   | -                 |
|              |               | CT                  | 101 (48.1%)       | 83 (45.4%)        | 89 (44.5%)     | 0.477            | 0.85 (0.54-1.33) | 0.654                 | 0.86 (0.45-1.65)   | 0.551                 | 1.17 (0.70-1.94)  |
| rs2975843    | Codominant    | TT                  | 76 (36.2%)        | 61 (33.3%)        | 112 (56.0%)    | Ref              | -                | Ref                   | -                  | Ref                   | -                 |
|              |               | TC                  | 97 (46.2%)        | 82 (44.8%)        | 81 (40.5%)     | 0.729            | 0.91 (0.55-1.52) | 0.046                 | 0.46 (0.22-0.99)   | 0.033                 | 1.82 (1.05-3.16)  |
|              |               | CC                  | 37 (17.6%)        | 40 (21.9%)        | 7 (3.5%)       | 0.806            | 1.08 (0.57-2.06) | 0.007                 | 0.15 (0.04-0.60)   | $2.98 \times 10^{-5}$ | 9.07 (3.22-25.55) |
|              | Additive      | T                   | 249 (59.3%)       | 204 (55.7%)       | 305 (76.2%)    | Ref              | -                | Ref                   | -                  | Ref                   | -                 |
|              |               | C                   | 171 (40.7%)       | 162 (44.3%)       | 95 (23.8%)     | 0.882            | 1.02 (0.74-1.42) | 0.003                 | 0.46 (0.28-0.76)   | $1.35 \times 10^{-5}$ | 2.35 (1.60-3.45)  |
|              | Dominant      | TT                  | 76 (36.2%)        | 61 (33.3%)        | 112 (56.0%)    | Ref              | -                | Ref                   | -                  | Ref                   | -                 |
|              |               | TC+CC               | 134 (63.8%)       | 122 (66.7%)       | 88 (44.0%)     | 0.895            | 0.97 (0.60-1.56) | 0.010                 | 0.42 (0.21-0.81)   | 0.001                 | 2.37 (1.42-3.96)  |
|              | Recessive     | TT+TC               | 173 (82.4%)       | 143 (78.1%)       | 193 (96.5%)    | Ref              | -                | Ref                   | -                  | Ref                   | -                 |
|              |               | CC                  | 37 (17.6%)        | 40 (21.9%)        | 7 (3.5%)       | 0.677            | 1.13 (0.64-1.98) | 0.022                 | 0.22 (0.06-0.80)   | $1.94 \times 10^{-4}$ | 6.29 (2.39-16.55) |
|              | Overdominant  | TT+CC               | 113 (53.8%)       | 101 (55.2%)       | 119 (59.5%)    | Ref              | -                | Ref                   | -                  | Ref                   | -                 |
|              |               | TC                  | 97 (46.2%)        | 82 (44.8%)        | 81 (40.5%)     | 0.647            | 0.90 (0.57-1.42) | 0.285                 | 0.70 (0.36-1.35)   | 0.513                 | 1.19 (0.71-1.97)  |

| SNP        | Genetic Model | Genotype/<br>Allele | HAPE-f<br>(n=210) | HAPE-p<br>(n=183) | HLs<br>(n=200) | HAPE-p vs HAPE-f |                  | HLs vs HAPE-f          |                   | HAPE-p vs HLs          |                    |
|------------|---------------|---------------------|-------------------|-------------------|----------------|------------------|------------------|------------------------|-------------------|------------------------|--------------------|
|            |               |                     |                   |                   |                | p value          | OR (95%CI)       | p value                | OR (95%CI)        | p value                | OR (95%CI)         |
| rs2929586  | Codominant    | TT                  | 77 (36.7%)        | 60 (32.8%)        | 18 (9.0%)      | Ref              | -                | Ref                    | -                 | Ref                    | -                  |
|            |               | TC                  | 101 (48.1%)       | 83 (45.3%)        | 89 (44.5%)     | 0.933            | 0.98 (0.59-1.62) | 0.054                  | 2.42 (0.99-5.92)  | 0.014                  | 0.40 (0.19-0.83)   |
|            |               | CC                  | 32 (15.2%)        | 40 (21.9%)        | 93 (46.5%)     | 0.123            | 1.66 (0.87-3.17) | $2.95 \times 10^{-5}$  | 8.38 (3.09-22.72) | $1.22 \times 10^{-5}$  | 0.18 (0.08-0.39)   |
|            | Additive      | T                   | 255 (60.7%)       | 203 (55.5%)       | 125 (31.2%)    | Ref              | -                | Ref                    | -                 | Ref                    | -                  |
|            |               | C                   | 165 (39.3%)       | 163 (44.5%)       | 275 (68.8%)    | 0.169            | 1.25 (0.91-1.73) | $6.29 \times 10^{-6}$  | 3.00 (1.86-4.84)  | $2.58 \times 10^{-6}$  | 0.42 (0.29-0.60)   |
|            | Dominant      | TT                  | 77 (36.7%)        | 60 (32.8%)        | 18 (9.0%)      | Ref              | -                | Ref                    | -                 | Ref                    | -                  |
|            |               | TC+CC               | 133 (63.3%)       | 123 (67.2%)       | 182 (91.0%)    | 0.583            | 1.14 (0.71-1.83) | 0.002                  | 3.94 (1.65-9.41)  | $3.84 \times 10^{-4}$  | 0.29 (0.15-0.57)   |
|            | Recessive     | TT+TC               | 178 (84.8%)       | 143 (78.1%)       | 107 (53.5%)    | Ref              | -                | Ref                    | -                 | Ref                    | -                  |
|            |               | CC                  | 32 (15.2%)        | 40 (21.9%)        | 93 (46.5%)     | 0.071            | 1.71 (0.95-3.08) | $4.80 \times 10^{-5}$  | 4.59 (2.20-9.56)  | 1.11E-04               | 0.34 (0.20-0.59)   |
|            | Overdominant  | TT+CC               | 109 (51.9%)       | 100 (54.7%)       | 111 (55.5%)    | Ref              | -                | Ref                    | -                 | Ref                    | -                  |
|            |               | TC                  | 101 (48.1%)       | 83 (45.3%)        | 89 (44.5%)     | 0.386            | 0.82 (0.52-1.29) | 0.302                  | 0.71 (0.37-1.36)  | 0.454                  | 1.21 (0.73-2.02)   |
| rs10099824 | Codominant    | GG                  | 92 (43.8%)        | 81 (44.3%)        | 168 (84.0%)    | Ref              | -                | Ref                    | -                 | Ref                    | -                  |
|            |               | GA                  | 87 (41.4%)        | 78 (42.6%)        | 28 (14.0%)     | 0.762            | 0.93 (0.56-1.53) | $5.52 \times 10^{-6}$  | 0.06 (0.02-0.20)  | $4.46 \times 10^{-9}$  | 7.71 (3.90-15.27)  |
|            |               | AA                  | 31 (14.8%)        | 24 (13.1%)        | 4 (2.0%)       | 0.256            | 0.67 (0.33-1.34) | $4.49 \times 10^{-5}$  | 0.02 (0.003-0.13) | $1.77 \times 10^{-4}$  | 11.08 (3.15-38.96) |
|            | Additive      | G                   | 271 (64.5%)       | 240 (65.6%)       | 364 (91.0%)    | Ref              | -                | Ref                    | -                 | Ref                    | -                  |
|            |               | A                   | 149 (35.5%)       | 126 (34.4%)       | 36 (9.0%)      | 0.285            | 0.83 (0.59-1.17) | $7.28 \times 10^{-11}$ | 0.07 (0.03-0.15)  | $7.05 \times 10^{-12}$ | 5.96 (3.58-9.92)   |
|            | Dominant      | GG                  | 92 (43.8%)        | 81 (44.3%)        | 168 (84.0%)    | Ref              | -                | Ref                    | -                 | Ref                    | -                  |
|            |               | GA+AA               | 118 (56.2%)       | 102 (55.7%)       | 32 (16.0%)     | 0.527            | 0.86 (0.55-1.36) | $2.37 \times 10^{-8}$  | 0.06 (0.02-0.16)  | $6.54 \times 10^{-11}$ | 8.04 (4.30-15.02)  |
|            | Recessive     | GG+GA               | 179 (85.2%)       | 159 (86.9%)       | 196 (98.0%)    | Ref              | -                | Ref                    | -                 | Ref                    | -                  |
|            |               | AA                  | 31 (14.8%)        | 24 (13.1%)        | 4 (2.0%)       | 0.230            | 0.66 (0.33-1.30) | $1.95 \times 10^{-4}$  | 0.03 (0.01-0.20)  | 0.003                  | 6.70 (1.89-23.70)  |
|            | Overdominant  | GG+AA               | 123 (58.6%)       | 105 (57.4%)       | 172 (86.0%)    | Ref              | -                | Ref                    | -                 | Ref                    | -                  |
|            |               | GA                  | 87 (41.4%)        | 78 (42.6%)        | 28 (14.0%)     | 0.851            | 1.04 (0.66-1.65) | $3.20 \times 10^{-5}$  | 0.13 (0.05-0.34)  | $9.06 \times 10^{-8}$  | 5.88 (3.07-11.25)  |

SPSS 16.0 was used to obtain p values after adjusting with age and gender. Significance was maintained at  $\leq 0.05$  after FDR correction. *TERF1*, telomere repeat binding factor 1; HAPE-f, HAPE-free; HAPE-p, HAPE-patients; HLs, Highlanders; n, number of samples; OR, odds ratio; CI, confidence interval; Ref, reference.

[B] Comparison of genotype and allele distribution in HLs with Han Chinese (CHB+CHS) population and Japanese (JPT) population.

| <i>TERF1</i> |                     |                         |                     |                |                |                   |                       |                  |
|--------------|---------------------|-------------------------|---------------------|----------------|----------------|-------------------|-----------------------|------------------|
| SNP          | Genotype/<br>Allele | CHB+CHS<br>(Ref, n=204) | JPT<br>(Ref, n=104) | HLs<br>(n=200) | HLs vs CHB+CHS |                   | HLs vs JPT            |                  |
|              |                     |                         |                     |                | p value        | OR (95%CI)        | p value               | OR (95%CI)       |
| rs2929589    | CC                  | 13 (6.3%)               | 5 (4.8%)            | 15 (7.5%)      | Ref            | -                 | Ref                   | -                |
|              | CT                  | 86 (41.3%)              | 33 (31.7%)          | 89 (44.5%)     | 0.790          | 0.90 (0.40-2.00)  | 1.000                 | 0.90 (0.30-2.67) |
|              | TT                  | 109 (52.4%)             | 66 (63.5%)          | 96 (48.0%)     | 0.503          | 0.76 (0.35-1.69)  | 0.227                 | 0.48 (0.17-1.40) |
|              | C                   | 112 (26.9%)             | 43 (20.7%)          | 119 (29.8%)    | Ref            | -                 | Ref                   | -                |
|              | T                   | 304 (73.1%)             | 165 (79.3%)         | 281 (70.2%)    | 0.370          | 0.87 (0.64-1.18)  | 0.016                 | 0.62 (0.41-0.92) |
| rs2975843    | TT                  | 141 (67.8%)             | 82 (78.8%)          | 112 (56.0%)    | Ref            | -                 | Ref                   | -                |
|              | TC                  | 64 (30.8%)              | 22 (21.2%)          | 81 (40.5%)     | 0.026          | 1.59 (1.06-2.40)  | $3.24 \times 10^{-4}$ | 2.70 (1.55-4.68) |
|              | CC                  | 3 (1.4%)                | 0 (0.0%)            | 7 (3.5%)       | 0.193          | 2.94 (0.74-11.62) | *                     | -                |
|              | T                   | 346 (83.2%)             | 186 (89.4%)         | 305 (76.3%)    | Ref            | -                 | Ref                   | -                |
|              | C                   | 70 (16.8%)              | 22 (10.6%)          | 95 (23.8%)     | 0.014          | 1.54 (1.09-2.17)  | $9.30 \times 10^{-5}$ | 2.63 (1.60-4.33) |
| rs2929586    | TT                  | 14 (6.7%)               | 7 (6.7%)            | 18 (9.0%)      | Ref            | -                 | Ref                   | -                |
|              | TC                  | 90 (43.3%)              | 39 (37.5%)          | 89 (44.5%)     | 0.496          | 0.77 (0.36-1.64)  | 0.806                 | 0.89 (0.34-2.30) |
|              | CC                  | 104 (50.0%)             | 58 (55.8%)          | 93 (46.5%)     | 0.342          | 0.70 (0.33-1.48)  | 0.318                 | 0.62 (0.25-1.59) |
|              | T                   | 118 (28.4%)             | 53 (25.5%)          | 125 (31.3%)    | Ref            | -                 | Ref                   | -                |
|              | C                   | 298 (71.6%)             | 155 (74.5%)         | 275 (68.8%)    | 0.368          | 0.87 (0.65-1.18)  | 0.138                 | 0.75 (0.52-1.10) |
| rs10099824   | GG                  | 151 (72.6%)             | 77 (74.0%)          | 168 (84.0%)    | Ref            | -                 | Ref                   | -                |
|              | GA                  | 52 (25.0%)              | 25 (24.0%)          | 28 (14.0%)     | 0.005          | 0.48 (0.29-0.81)  | 0.029                 | 0.51 (0.28-0.94) |
|              | AA                  | 5 (2.4%)                | 2 (1.9%)            | 4 (2.0%)       | 0.741          | 0.72 (0.19-2.73)  | 1.000                 | 0.92 (0.16-5.11) |
|              | G                   | 354 (85.1%)             | 179 (86.1%)         | 364 (91.0%)    | Ref            | -                 | Ref                   | -                |
|              | A                   | 62 (14.9%)              | 29 (13.9%)          | 36 (9.0%)      | 0.010          | 0.56 (0.37-0.87)  | 0.061                 | 0.61 (0.36-1.03) |

SISA online tool was used to obtain p values. Significance was maintained at  $\leq 0.05$  after FDR correction. \*Analysis could not be performed because the representatives of a genotype were absent in a study group. *TERF1*, telomere repeat binding factor 1; CHB+CHS, Han Chinese population comprising of Han Chinese in Beijing (CHB) and Southern Han Chinese (CHS); JPT, Japanese population; HLs, highlanders; Ref, reference; n, number of samples; OR, odds ratio; CI, confidence interval.

Supplementary Table S5: Genotype and allele distribution of 5 SNPs of *TERF2*

[A] Comparison of genotype and allele distribution among HAPE-f, HAPE-p and HLs.

| <i>TERF2</i> |               |                     |                   |                   |                |                  |                  |               |                  |                         |                  |
|--------------|---------------|---------------------|-------------------|-------------------|----------------|------------------|------------------|---------------|------------------|-------------------------|------------------|
| SNP          | Genetic Model | Genotype/<br>Allele | HAPE-f<br>(n=210) | HAPE-p<br>(n=183) | HLs<br>(n=200) | HAPE-p vs HAPE-f |                  | HLs vs HAPE-f |                  | HAPE-p vs HLs           |                  |
|              |               |                     |                   |                   |                | p value          | OR (95%CI)       | p value       | OR (95%CI)       | p value                 | OR (95%CI)       |
| rs3785073    | Codominant    | GG                  | 99 (47.2%)        | 76 (41.5%)        | 108 (54.0%)    | Ref              | -                | Ref           | -                | Ref                     | -                |
|              |               | GA                  | 83 (39.5%)        | 86 (47.0%)        | 80 (40.0%)     | 0.864            | 1.04 (0.64-1.71) | 0.033         | 0.44 (0.20-0.94) | 0.001                   | 2.64 (1.51-4.62) |
|              |               | AA                  | 28 (13.3%)        | 21 (11.5%)        | 12 (6.0%)      | 0.899            | 0.96 (0.47-1.94) | 0.018         | 0.16 (0.03-0.73) | 0.070                   | 2.70 (0.92-7.90) |
|              | Additive      | G                   | 281 (66.9%)       | 238 (65.0%)       | 296 (74.0%)    | Ref              | -                | Ref           | -                | Ref                     | -                |
|              |               | A                   | 139 (33.1%)       | 128 (35.0%)       | 104 (26.0%)    | 0.994            | 1.00 (0.71-1.40) | 0.002         | 0.43 (0.24-0.74) | 0.001                   | 1.94 (1.30-2.90) |
|              | Dominant      | GG                  | 99 (47.2%)        | 76 (41.5%)        | 108 (54.0%)    | Ref              | -                | Ref           | -                | Ref                     | -                |
|              |               | GA+AA               | 111 (52.8%)       | 107 (58.5%)       | 92 (46.0%)     | 0.874            | 1.04 (0.66-1.63) | 0.009         | 0.40 (0.20-0.79) | 3.31 × 10 <sup>-4</sup> | 2.67 (1.56-4.55) |
|              | Recessive     | GG+GA               | 182 (86.7%)       | 162 (88.5%)       | 188 (94.0%)    | Ref              | -                | Ref           | -                | Ref                     | -                |
|              |               | AA                  | 28 (13.3%)        | 21 (11.5%)        | 12 (6.0%)      | 0.823            | 0.92 (0.47-1.84) | 0.041         | 0.21 (0.05-0.94) | 0.298                   | 1.66 (0.64-4.32) |
|              | Overdominant  | GG+AA               | 127 (60.5%)       | 97 (53.0%)        | 120 (60.0%)    | Ref              | -                | Ref           | -                | Ref                     | -                |
|              |               | GA                  | 83 (39.5%)        | 86 (47.0%)        | 80 (40.0%)     | 0.756            | 1.08 (0.68-1.70) | 0.124         | 0.58 (0.29-1.16) | 0.002                   | 2.35 (1.36-4.05) |
| rs8061352    | Codominant    | TT                  | 101 (48.1%)       | 70 (38.2%)        | 107 (53.5%)    | Ref              | -                | Ref           | -                | Ref                     | -                |
|              |               | TA                  | 82 (39.0%)        | 94 (51.4%)        | 80 (40.0%)     | 0.021            | 1.78 (1.09-2.89) | 0.501         | 0.78 (0.38-1.60) | 1.67 × 10 <sup>-4</sup> | 2.92 (1.67-5.11) |
|              |               | AA                  | 27 (12.9%)        | 19 (10.4%)        | 13 (6.5%)      | 0.693            | 1.16 (0.56-2.39) | 0.116         | 0.37 (0.11-1.28) | 0.090                   | 2.47 (0.87-7.04) |
|              | Additive      | T                   | 284 (67.6%)       | 234 (63.9%)       | 294 (73.5%)    | Ref              | -                | Ref           | -                | Ref                     | -                |
|              |               | A                   | 136 (32.4%)       | 132 (36.1%)       | 106 (26.5%)    | 0.155            | 1.28 (0.91-1.79) | 0.116         | 0.65 (0.38-1.11) | 0.001                   | 1.97 (1.32-2.93) |
|              | Dominant      | TT                  | 101 (48.1%)       | 70 (38.2%)        | 107 (53.5%)    | Ref              | -                | Ref           | -                | Ref                     | -                |
|              |               | TA+AA               | 109 (51.9%)       | 113 (61.8%)       | 93 (46.5%)     | 0.036            | 1.63 (1.03-2.59) | 0.248         | 0.68 (0.35-1.31) | 1.12 × 10 <sup>-4</sup> | 2.87 (1.68-4.91) |
|              | Recessive     | TT+TA               | 183 (87.1%)       | 164 (89.6%)       | 187 (93.5%)    | Ref              | -                | Ref           | -                | Ref                     | -                |
|              |               | AA                  | 27 (12.9%)        | 19 (10.4%)        | 13 (6.5%)      | 0.769            | 0.90 (0.44-1.82) | 0.155         | 0.38 (0.10-1.43) | 0.440                   | 1.45 (0.56-3.76) |

| SNP         | Genetic Model | Genotype/<br>Allele | HAPE-f<br>(n=210) | HAPE-p<br>(n=183) | HLs<br>(n=200) | HAPE-p vs HAPE-f |                  | HLs vs HAPE-f |                   | HAPE-p vs HLs |                  |
|-------------|---------------|---------------------|-------------------|-------------------|----------------|------------------|------------------|---------------|-------------------|---------------|------------------|
|             |               |                     |                   |                   |                | p value          | OR (95%CI)       | p value       | OR (95%CI)        | p value       | OR (95%CI)       |
| rs153058    | Codominant    | TT                  | 129 (61.4%)       | 107 (58.5%)       | 92 (46.0%)     | Ref              | -                | Ref           | -                 | Ref           | -                |
|             |               | TC                  | 73 (34.8%)        | 65 (35.5%)        | 84 (42.0%)     | 0.680            | 1.11 (0.69-1.79) | 0.178         | 1.61 (0.80-3.24)  | 0.047         | 0.58 (0.33-0.99) |
|             |               | CC                  | 8 (3.8%)          | 11 (6.0%)         | 24 (12.0%)     | 0.164            | 2.07 (0.74-5.79) | 0.015         | 4.59 (1.35-15.63) | 0.015         | 0.31 (0.12-0.80) |
|             | Additive      | T                   | 331 (78.8%)       | 279 (76.2%)       | 268 (67.0%)    | Ref              | -                | Ref           | -                 | Ref           | -                |
|             |               | C                   | 89 (21.2%)        | 87 (23.8%)        | 132 (33.0%)    | 0.253            | 1.25 (0.85-1.82) | 0.014         | 1.89 (1.14-3.15)  | 0.004         | 0.55 (0.37-0.83) |
|             | Dominant      | TT                  | 129 (61.4%)       | 107 (58.5%)       | 92 (46.0%)     | Ref              | -                | Ref           | -                 | Ref           | -                |
|             |               | TC+CC               | 81 (38.6%)        | 76 (41.5%)        | 108 (54.0%)    | 0.440            | 1.20 (0.76-1.89) | 0.054         | 1.91 (0.99-3.67)  | 0.012         | 0.52 (0.31-0.86) |
|             | Recessive     | TT+TC               | 202 (96.2%)       | 172 (94.0%)       | 176 (88.0%)    | Ref              | -                | Ref           | -                 | Ref           | -                |
|             |               | CC                  | 8 (3.8%)          | 11 (6.0%)         | 24 (12.0%)     | 0.179            | 2.00 (0.73-5.47) | 0.028         | 3.86 (1.16-12.82) | 0.038         | 0.38 (0.15-0.95) |
|             | Overdominant  | TT+CC               | 137 (65.2%)       | 118 (64.5%)       | 116 (58.0%)    | Ref              | -                | Ref           | -                 | Ref           | -                |
|             |               | TC                  | 73 (34.8%)        | 65 (35.5%)        | 84 (42.0%)     | 0.870            | 1.04 (0.65-1.67) | 0.443         | 1.30 (0.67-2.51)  | 0.160         | 0.69 (0.41-1.16) |
| rs113062367 | Codominant    | TT                  | 141 (67.1%)       | 128 (69.9%)       | 146 (73.0%)    | Ref              | -                | Ref           | -                 | Ref           | -                |
|             |               | TC                  | 63 (30.0%)        | 51 (27.9%)        | 49 (24.5%)     | 0.699            | 1.11 (0.66-1.85) | 0.288         | 0.64 (0.29-1.45)  | 0.921         | 1.03 (0.58-1.83) |
|             |               | CC                  | 6 (2.9%)          | 4 (2.2%)          | 5 (2.5%)       | 0.051            | 0.17 (0.03-1.01) | 0.052         | 0.14 (0.02-1.02)  | 0.710         | 0.73 (0.14-3.86) |
|             | Additive      | T                   | 345 (82.1%)       | 307 (83.9%)       | 341 (85.2%)    | Ref              | -                | Ref           | -                 | Ref           | -                |
|             |               | C                   | 75 (17.9%)        | 59 (16.1%)        | 59 (14.8%)     | 0.493            | 0.86 (0.56-1.33) | 0.064         | 0.54 (0.28-1.04)  | 0.868         | 0.96 (0.59-1.57) |
|             | Dominant      | TT                  | 141 (67.1%)       | 128 (69.9%)       | 146 (73.0%)    | Ref              | -                | Ref           | -                 | Ref           | -                |
|             |               | TC+CC               | 69 (32.9%)        | 55 (30.1%)        | 54 (27.0%)     | 0.871            | 0.96 (0.59-1.57) | 0.159         | 0.59 (0.28-1.23)  | 0.977         | 0.99 (0.57-1.73) |
|             | Recessive     | TT+TC               | 204 (97.1%)       | 179 (97.8%)       | 195 (97.5%)    | Ref              | -                | Ref           | -                 | Ref           | -                |
|             |               | CC                  | 6 (2.9%)          | 4 (2.2%)          | 5 (2.5%)       | 0.043            | 0.17 (0.03-0.95) | 0.029         | 0.10 (0.01-0.79)  | 0.608         | 0.63 (0.11-3.66) |
|             | Overdominant  | TT+CC               | 147 (70.0%)       | 132 (72.1%)       | 151 (75.5%)    | Ref              | -                | Ref           | -                 | Ref           | -                |
|             |               | TC                  | 63 (30.0%)        | 51 (27.9%)        | 49 (24.5%)     | 0.644            | 1.12 (0.68-1.85) | 0.458         | 0.76 (0.36-1.58)  | 0.895         | 1.04 (0.59-1.83) |

| SNP       | Genetic Model | Genotype/<br>Allele | HAPE-f<br>(n=210)         | HAPE-p<br>(n=183)         | HLs<br>(n=200)            | HAPE-p vs HAPE-f |                       | HLs vs HAPE-f |                       | HAPE-p vs HLs |                       |
|-----------|---------------|---------------------|---------------------------|---------------------------|---------------------------|------------------|-----------------------|---------------|-----------------------|---------------|-----------------------|
|           |               |                     |                           |                           |                           | p value          | OR (95%CI)            | p value       | OR (95%CI)            | p value       | OR (95%CI)            |
| rs4783704 | Codominant    | CC                  | 121 (57.6%)               | 119 (65.0%)               | 103 (51.5%)               | Ref              | -                     | Ref           | -                     | Ref           | -                     |
|           |               | CT                  | 72 (34.3%)                | 52 (28.4%)                | 81 (40.5%)                | 0.344            | 0.79 (0.48-1.29)      | 0.452         | 1.31 (0.65-2.65)      | 0.143         | 0.66 (0.38-1.15)      |
|           |               | TT                  | 17 (8.1%)                 | 12 (6.6%)                 | 16 (8.0%)                 | 0.956            | 0.98 (0.40-2.38)      | 0.142         | 2.26 (0.76-6.68)      | 0.025         | 0.35 (0.14-0.88)      |
|           | Additive      | C                   | 314 (74.8%)               | 290 (79.2%)               | 287 (71.8%)               | Ref              | -                     | Ref           | -                     | Ref           | -                     |
|           |               | T                   | 106 (25.2%)               | 76 (20.8%)                | 113 (28.2%)               | 0.533            | 0.89 (0.61-1.30)      | 0.108         | 1.53 (0.91-2.56)      | 0.009         | 0.58 (0.38-0.87)      |
|           | Dominant      | CC                  | 121 (57.6%)               | 119 (65.0%)               | 103 (51.5%)               | Ref              | -                     | Ref           | -                     | Ref           | -                     |
|           |               | CT+TT               | 89 (42.4%)                | 64 (35.0%)                | 97 (48.5%)                | 0.400            | 0.82 (0.52-1.30)      | 0.232         | 1.49 (0.77-2.88)      | 0.037         | 0.58 (0.35-0.97)      |
|           | Recessive     | CC+CT               | 193 (91.9%)               | 171 (93.4%)               | 184 (92.0%)               | Ref              | -                     | Ref           | -                     | Ref           | -                     |
|           |               | TT                  | 17 (8.1%)                 | 12 (6.6%)                 | 16 (8.0%)                 | 0.879            | 1.07 (0.45-2.56)      | 0.148         | 2.25 (0.75-6.75)      | 0.042         | 0.40 (0.16-0.97)      |
|           | Overdominant  | CC+TT<br>CT         | 138 (65.7%)<br>72 (34.3%) | 131 (71.6%)<br>52 (28.4%) | 119 (59.5%)<br>81 (40.5%) | Ref<br>0.335     | -<br>0.79 (0.48-1.28) | Ref<br>0.694  | -<br>1.15 (0.58-2.23) | Ref<br>0.321  | -<br>0.76 (0.45-1.30) |

SPSS 16.0 was used to obtain p values after adjusting with age and gender. Significance was maintained at  $\leq 0.05$  after FDR correction. *TERF2*, telomere repeat binding factor 2; HAPE-f, HAPE-free; HAPE-p, HAPE-patients; HLs, Highlanders; n, number of samples; OR, odds ratio; CI, confidence interval; Ref, reference.



[B] Comparison of genotype and allele distribution in HLs with Han Chinese (CHB+CHS) population and Japanese (JPT) population.

| <i>TERF2</i> |                     |                         |                     |                |                |                   |                       |                  |
|--------------|---------------------|-------------------------|---------------------|----------------|----------------|-------------------|-----------------------|------------------|
| SNP          | Genotype/<br>Allele | CHB+CHS<br>(Ref, n=204) | JPT<br>(Ref, n=104) | HLs<br>(n=200) | HLs vs CHB+CHS |                   | HLs vs JPT            |                  |
|              |                     |                         |                     |                | p value        | OR (95%CI)        | p value               | OR (95%CI)       |
| rs3785073    | GG                  | 171 (82.2%)             | 86 (82.7%)          | 108 (54.0%)    | Ref            | -                 | Ref                   | -                |
|              | GA                  | 34 (16.3%)              | 18 (17.3%)          | 80 (40.0%)     | <0.000001      | 3.73 (2.33-5.95)  | $1.20 \times 10^{-5}$ | 3.54 (1.97-6.35) |
|              | AA                  | 3 (1.4%)                | 0 (0.0%)            | 12 (6.0%)      | 0.002          | 6.33 (1.75-22.96) | *                     | -                |
|              | G                   | 376 (90.4%)             | 190 (91.3%)         | 296 (74.0%)    | Ref            | -                 | Ref                   | -                |
|              | A                   | 40 (9.6%)               | 18 (8.7%)           | 104 (26.0%)    | <0.000001      | 3.30 (2.23-4.90)  | <0.000001             | 3.71 (2.18-6.32) |
| rs8061352    | TT                  | 171 (82.2%)             | 86 (82.7%)          | 107 (53.5%)    | Ref            | -                 | Ref                   | -                |
|              | TA                  | 34 (16.3%)              | 18 (17.3%)          | 80 (40.0%)     | <0.000001      | 3.76 (2.35-6.01)  | $1.10 \times 10^{-5}$ | 3.57 (1.99-6.41) |
|              | AA                  | 3 (1.4%)                | 0 (0.0%)            | 13 (6.5%)      | 0.001          | 6.93 (1.93-24.87) | *                     | -                |
|              | T                   | 376 (90.4%)             | 190 (91.3%)         | 294 (73.5%)    | Ref            | -                 | Ref                   | -                |
|              | A                   | 40 (9.6%)               | 18 (8.7%)           | 106 (26.5%)    | <0.000001      | 3.39 (2.29-5.03)  | <0.000001             | 3.81 (2.24-6.48) |
| rs153058     | TT                  | 65 (31.3%)              | 32 (30.8%)          | 92 (46.0%)     | Ref            | -                 | Ref                   | -                |
|              | TC                  | 103 (49.5%)             | 52 (50.0%)          | 84 (42.0%)     | 0.011          | 0.58 (0.38-0.89)  | 0.032                 | 0.56 (0.33-0.96) |
|              | CC                  | 40 (19.2%)              | 20 (19.2%)          | 24 (12.0%)     | 0.004          | 0.42 (0.23-0.77)  | 0.015                 | 0.42 (0.20-0.86) |
|              | T                   | 233 (56.0%)             | 116 (55.8%)         | 268 (67.0%)    | Ref            | -                 | Ref                   | -                |
|              | C                   | 183 (44.0%)             | 92 (44.2%)          | 132 (33.0%)    | 0.001          | 0.63 (0.47-0.83)  | 0.006                 | 0.62 (0.44-0.88) |
| rs113062367  | TT                  | 208 (100%)              | 104 (100%)          | 146 (73.0%)    | Ref            | -                 | Ref                   | -                |
|              | TC                  | 0 (0%)                  | 0 (0%)              | 49 (24.5%)     | *              | -                 | *                     | -                |
|              | CC                  | 0 (0%)                  | 0 (0%)              | 5 (2.5%)       | *              | -                 | *                     | -                |
|              | T                   | 416 (100.0%)            | 208 (100.0%)        | 341 (85.3%)    | Ref            | -                 | Ref                   | -                |
|              | C                   | 0 (0.0%)                | 0 (0.0%)            | 59 (14.8%)     | *              | -                 | *                     | -                |

| SNP       | Genotype/<br>Allele | CHB+CHS<br>(Ref, n=204) | JPT<br>(Ref, n=104) | HLs<br>(n=200) | HLs vs CHB+CHS |                  | HLs vs JPT            |                    |
|-----------|---------------------|-------------------------|---------------------|----------------|----------------|------------------|-----------------------|--------------------|
|           |                     |                         |                     |                | p value        | OR (95%CI)       | p value               | OR (95%CI)         |
| rs4783704 | CC                  | 138 (66.3%)             | 80 (76.9%)          | 103 (51.5%)    | Ref            | -                | Ref                   | -                  |
|           | CT                  | 64 (30.8%)              | 23 (22.1%)          | 81 (40.5%)     | 0.012          | 1.70 (1.12-2.57) | $2.45 \times 10^{-4}$ | 2.74 (1.58-4.73)   |
|           | TT                  | 6 (2.9%)                | 1 (1.0%)            | 16 (8.0%)      | 0.007          | 3.57 (1.35-9.45) | 0.002                 | 12.43 (1.61-95.70) |
|           | C                   | 340 (81.7%)             | 183 (88.0%)         | 287 (71.8%)    | Ref            | -                | Ref                   | -                  |
|           | T                   | 76 (18.3%)              | 25 (12.0%)          | 113 (28.3%)    | 0.001          | 1.76 (1.27-2.45) | $6.00 \times 10^{-6}$ | 2.88 (1.80-4.62)   |

SISA online tool was used to obtain p values. Significance was maintained at  $\leq 0.05$  after FDR correction. \*Analysis could not be performed because the representatives of a genotype and/or allele were absent in a study group. *TERF2*, telomere repeat binding factor 2; CHB+CHS, Han Chinese population comprising of Han Chinese in Beijing (CHB) and Southern Han Chinese (CHS); JPT, Japanese population; HLs, highlanders; Ref, reference; n, number of samples; OR, odds ratio; CI, confidence interval.

Supplementary Table S6: Genotype and allele distribution of 7 SNPs of *POT1*

[A] Comparison of genotype and allele distribution among HAPE-f, HAPE-p and HLs.

| <i>POT1</i> |               |                     |                   |                   |                |                  |                  |               |                  |               |                  |
|-------------|---------------|---------------------|-------------------|-------------------|----------------|------------------|------------------|---------------|------------------|---------------|------------------|
| SNP         | Genetic Model | Genotype/<br>Allele | HAPE-f<br>(n=210) | HAPE-p<br>(n=183) | HLs<br>(n=200) | HAPE-p vs HAPE-f |                  | HLs vs HAPE-f |                  | HAPE-p vs HLs |                  |
|             |               |                     |                   |                   |                | p value          | OR (95%CI)       | p value       | OR (95%CI)       | p value       | OR (95%CI)       |
| rs727505    | Codominant    | CC                  | 116 (55.3%)       | 95 (51.9%)        | 113 (56.5%)    | Ref              | -                | Ref           | -                | Ref           | -                |
|             |               | CT                  | 83 (39.5%)        | 84 (45.9%)        | 71 (35.5%)     | 0.010            | 1.88 (1.16-3.05) | 0.773         | 1.11 (0.54-2.28) | 0.083         | 1.59 (0.94-2.69) |
|             |               | TT                  | 11 (5.2%)         | 4 (2.2%)          | 16 (8.0%)      | 0.258            | 0.47 (0.13-1.74) | 0.988         | 1.01 (0.27-3.76) | 0.112         | 0.34 (0.09-1.28) |
|             | Additive      | C                   | 315 (75.0%)       | 274 (74.9%)       | 297 (74.2%)    | Ref              | -                | Ref           | -                | Ref           | -                |
|             |               | T                   | 105 (25.0%)       | 92 (25.1%)        | 103 (25.8%)    | 0.204            | 1.27 (0.88-1.83) | 0.865         | 1.05 (0.60-1.82) | 0.754         | 1.07 (0.71-1.61) |
|             | Dominant      | CC                  | 116 (55.3%)       | 95 (51.9%)        | 113 (56.5%)    | Ref              | -                | Ref           | -                | Ref           | -                |
|             |               | CT+TT               | 94 (44.7%)        | 88 (48.1%)        | 87 (43.5%)     | 0.031            | 1.67 (1.05-2.66) | 0.824         | 1.08 (0.55-2.11) | 0.223         | 1.37 (0.83-2.28) |
|             | Recessive     | CC+CT               | 199 (94.8%)       | 179 (97.8%)       | 184 (92.0%)    | Ref              | -                | Ref           | -                | Ref           | -                |
|             |               | TT                  | 11 (5.2%)         | 4 (2.2%)          | 16 (8.0%)      | 0.134            | 0.35 (0.09-1.38) | 0.971         | 0.97 (0.23-4.09) | 0.053         | 0.27 (0.07-1.02) |
|             | Overdominant  | CC+TT               | 127 (60.5%)       | 99 (54.1%)        | 129 (64.5%)    | Ref              | -                | Ref           | -                | Ref           | -                |
|             |               | CT                  | 83 (39.5%)        | 84 (45.9%)        | 71 (35.5%)     | 0.006            | 1.94 (1.21-3.10) | 0.805         | 1.09 (0.55-2.17) | 0.038         | 1.73 (1.03-2.92) |
| rs17246404  | Codominant    | CC                  | 122 (58.1%)       | 107 (58.5%)       | 120 (60.0%)    | Ref              | -                | Ref           | -                | Ref           | -                |
|             |               | CT                  | 76 (36.2%)        | 65 (35.5%)        | 60 (30.0%)     | 0.456            | 1.20 (0.74-1.95) | 0.359         | 0.70 (0.33-1.49) | 0.159         | 1.49 (0.86-2.58) |
|             |               | TT                  | 12 (5.7%)         | 11 (6.0%)         | 20 (10.0%)     | 0.686            | 0.82 (0.31-2.16) | 0.884         | 0.91 (0.27-3.10) | 0.477         | 0.71 (0.28-1.83) |
|             | Additive      | C                   | 320 (76.2%)       | 279 (76.2%)       | 300 (75.0%)    | Ref              | -                | Ref           | -                | Ref           | -                |
|             |               | T                   | 100 (23.8%)       | 87 (23.8%)        | 100 (25.0%)    | 0.871            | 1.03 (0.71-1.50) | 0.438         | 0.80 (0.46-1.40) | 0.725         | 1.08 (0.71-1.63) |
|             | Dominant      | CC                  | 122 (58.1%)       | 107 (58.5%)       | 120 (60.0%)    | Ref              | -                | Ref           | -                | Ref           | -                |
|             |               | CT+TT               | 88 (41.9%)        | 76 (41.5%)        | 80 (40.0%)     | 0.625            | 1.12 (0.71-1.77) | 0.363         | 0.73 (0.37-1.44) | 0.325         | 1.30 (0.77-2.17) |
|             | Recessive     | CC+CT               | 198 (94.3%)       | 172 (94.0%)       | 180 (90.0%)    | Ref              | -                | Ref           | -                | Ref           | -                |
|             |               | TT                  | 12 (5.7%)         | 11 (6.0%)         | 20 (10.0%)     | 0.532            | 0.73 (0.27-1.97) | 0.949         | 0.96 (0.26-3.47) | 0.314         | 0.62 (0.24-1.58) |
|             | Overdominant  | CC+TT               | 134 (63.8%)       | 118 (64.5%)       | 140 (70.0%)    | Ref              | -                | Ref           | -                | Ref           | -                |
|             |               | CT                  | 76 (36.2%)        | 65 (35.5%)        | 60 (30.0%)     | 0.424            | 1.21 (0.76-1.94) | 0.357         | 0.71 (0.35-1.46) | 0.109         | 1.56 (0.91-2.69) |

| SNP         | Genetic Model | Genotype/<br>Allele | HAPE-f<br>(n=210) | HAPE-p<br>(n=183) | HLs<br>(n=200) | HAPE-p vs HAPE-f |                  | HLs vs HAPE-f |                  | HAPE-p vs HLs           |                   |
|-------------|---------------|---------------------|-------------------|-------------------|----------------|------------------|------------------|---------------|------------------|-------------------------|-------------------|
|             |               |                     |                   |                   |                | p value          | OR (95%CI)       | p value       | OR (95%CI)       | p value                 | OR (95%CI)        |
| rs7794637   | Codominant    | CC                  | 90 (42.9%)        | 63 (34.4%)        | 105 (52.5%)    | Ref              | -                | Ref           | -                | Ref                     | -                 |
|             |               | CT                  | 95 (45.2%)        | 88 (48.1%)        | 82 (41.0%)     | 0.682            | 0.90 (0.54-1.49) | 0.137         | 0.59 (0.29-1.19) | 0.003                   | 2.30 (1.32-4.00)  |
|             |               | TT                  | 25 (11.9%)        | 32 (17.5%)        | 13 (6.5%)      | 0.297            | 1.43 (0.73-2.81) | 0.010         | 0.18 (0.05-0.66) | 0.003                   | 4.22 (1.62-11.02) |
|             | Additive      | C                   | 275 (65.5%)       | 214 (58.5%)       | 292 (73.0%)    | Ref              | -                | Ref           | -                | Ref                     | -                 |
|             |               | T                   | 145 (34.5%)       | 152 (41.5%)       | 108 (27.0%)    | 0.480            | 1.13 (0.81-1.57) | 0.010         | 0.51 (0.31-0.85) | 2.62 × 10 <sup>-4</sup> | 2.04 (1.39-2.99)  |
|             | Dominant      | CC                  | 90 (42.9%)        | 63 (34.4%)        | 105 (52.5%)    | Ref              | -                | Ref           | -                | Ref                     | -                 |
|             |               | CT+TT               | 120 (57.1%)       | 120 (65.6%)       | 95 (47.5%)     | 0.901            | 1.03 (0.65-1.64) | 0.037         | 0.49 (0.25-0.96) | 4.82 × 10 <sup>-4</sup> | 2.54 (1.51-4.29)  |
|             | Recessive     | CC+CT               | 185 (88.1%)       | 151 (82.5%)       | 187 (93.5%)    | Ref              | -                | Ref           | -                | Ref                     | -                 |
|             |               | TT                  | 25 (11.9%)        | 32 (17.5%)        | 13 (6.5%)      | 0.239            | 1.46 (0.78-2.75) | 0.037         | 0.30 (0.10-0.93) | 0.027                   | 2.58 (1.11-5.98)  |
|             | Overdominant  | CC+TT               | 115 (54.8%)       | 95 (51.9%)        | 118 (59.0%)    | Ref              | -                | Ref           | -                | Ref                     | -                 |
|             |               | CT                  | 95 (45.2%)        | 88 (48.1%)        | 82 (41.0%)     | 0.466            | 0.84 (0.53-1.33) | 0.438         | 0.77 (0.40-1.49) | 0.039                   | 1.72 (1.03-2.89)  |
| rs116916706 | Codominant    | CC                  | 155 (73.8%)       | 130 (71.0%)       | 143 (71.5%)    | Ref              | -                | Ref           | -                | Ref                     | -                 |
|             |               | CA                  | 49 (23.3%)        | 50 (27.3%)        | 54 (27.0%)     | 0.370            | 1.28 (0.75-2.19) | 0.758         | 1.14 (0.49-2.68) | 0.552                   | 1.19 (0.67-2.13)  |
|             |               | AA                  | 6 (2.9%)          | 3 (1.7%)          | 3 (1.5%)       | 0.140            | 0.28 (0.05-1.52) | 0.093         | 0.15 (0.02-1.37) | 0.175                   | 0.28 (0.04-1.76)  |
|             | Additive      | C                   | 359 (85.5%)       | 310 (84.7%)       | 340 (85.0%)    | Ref              | -                | Ref           | -                | Ref                     | -                 |
|             |               | A                   | 61 (14.5%)        | 56 (15.3%)        | 60 (15.0%)     | 0.935            | 0.98 (0.62-1.55) | 0.360         | 0.72 (0.36-1.45) | 0.942                   | 0.98 (0.59-1.62)  |
|             | Dominant      | CC                  | 155 (73.8%)       | 130 (71.0%)       | 143 (71.5%)    | Ref              | -                | Ref           | -                | Ref                     | -                 |
|             |               | CA+AA               | 55 (26.2%)        | 53 (29.0%)        | 57 (28.5%)     | 0.664            | 1.12 (0.67-1.86) | 0.731         | 0.87 (0.41-1.88) | 0.774                   | 1.09 (0.62-1.90)  |
|             | Recessive     | CC+CA               | 204 (97.1%)       | 180 (98.3%)       | 197 (98.5%)    | Ref              | -                | Ref           | -                | Ref                     | -                 |
|             |               | AA                  | 6 (2.9%)          | 3 (1.7%)          | 3 (1.5%)       | 0.110            | 0.24 (0.04-1.37) | 0.077         | 0.14 (0.02-1.24) | 0.170                   | 0.28 (0.05-1.73)  |
|             | Overdominant  | CC+AA               | 161 (76.7%)       | 133 (72.7%)       | 146 (73.0%)    | Ref              | -                | Ref           | -                | Ref                     | -                 |
|             |               | CA                  | 49 (23.3%)        | 50 (27.3%)        | 54 (27.0%)     | 0.325            | 1.30 (0.77-2.19) | 0.715         | 1.16 (0.52-2.56) | 0.504                   | 1.22 (0.68-2.16)  |

| SNP       | Genetic Model | Genotype/<br>Allele | HAPE-f<br>(n=210) | HAPE-p<br>(n=183) | HLs<br>(n=200) | HAPE-p vs HAPE-f |                  | HLs vs HAPE-f |                   | HAPE-p vs HLs |                  |
|-----------|---------------|---------------------|-------------------|-------------------|----------------|------------------|------------------|---------------|-------------------|---------------|------------------|
|           |               |                     |                   |                   |                | p value          | OR (95%CI)       | p value       | OR (95%CI)        | p value       | OR (95%CI)       |
| rs4360236 | Codominant    | CC                  | 110 (52.4%)       | 97 (53.0%)        | 108 (54.0%)    | Ref              | -                | Ref           | -                 | Ref           | -                |
|           |               | CT                  | 81 (38.6%)        | 68 (37.2%)        | 77 (38.5%)     | 0.664            | 0.90 (0.54-1.48) | 0.675         | 0.86 (0.42-1.77)  | 0.542         | 1.18 (0.69-2.00) |
|           |               | TT                  | 19 (9.0%)         | 18 (9.8%)         | 15 (7.5%)      | 0.997            | 1.00 (0.47-2.14) | 0.100         | 0.39 (0.13-1.20)  | 0.673         | 0.83 (0.34-2.01) |
|           | Additive      | C                   | 301 (71.7%)       | 262 (71.6%)       | 293 (73.2%)    | Ref              | -                | Ref           | -                 | Ref           | -                |
|           |               | T                   | 119 (28.3%)       | 104 (28.4%)       | 107 (26.8%)    | 0.804            | 0.96 (0.67-1.36) | 0.114         | 0.66 (0.39-1.11)  | 0.954         | 1.01 (0.68-1.50) |
|           | Dominant      | CC                  | 110 (52.4%)       | 97 (53.0%)        | 108 (54.0%)    | Ref              | -                | Ref           | -                 | Ref           | -                |
|           |               | CT+TT               | 100 (47.6%)       | 86 (47.0%)        | 92 (46.0%)     | 0.721            | 0.92 (0.59-1.45) | 0.313         | 0.71 (0.37-1.38)  | 0.685         | 1.11 (0.67-1.84) |
|           | Recessive     | CC+CT               | 191 (91.0%)       | 165 (90.2%)       | 185 (92.5%)    | Ref              | -                | Ref           | -                 | Ref           | -                |
|           |               | TT                  | 19 (9.0%)         | 18 (9.8%)         | 15 (7.5%)      | 0.948            | 1.03 (0.49-2.17) | 0.099         | 0.40 (0.13-1.19)  | 0.558         | 0.77 (0.32-1.84) |
|           | Overdominant  | CC+TT               | 129 (61.4%)       | 115 (62.8%)       | 123 (61.5%)    | Ref              | -                | Ref           | -                 | Ref           | -                |
|           |               | CT                  | 81 (38.6%)        | 68 (37.2%)        | 77 (38.5%)     | 0.681            | 0.91 (0.57-1.45) | 0.998         | 1.00 (0.51-1.98)  | 0.446         | 1.22 (0.73-2.06) |
| rs7782410 | Codominant    | GG                  | 80 (38.1%)        | 70 (38.3%)        | 58 (29.0%)     | Ref              | -                | Ref           | -                 | Ref           | -                |
|           |               | GA                  | 103 (49.0%)       | 89 (48.6%)        | 96 (48.0%)     | 0.597            | 1.14 (0.70-1.88) | 0.056         | 2.15 (0.98-4.72)  | 0.459         | 0.80 (0.45-1.43) |
|           |               | AA                  | 27 (12.9%)        | 24 (13.1%)        | 46 (23.0%)     | 0.610            | 1.19 (0.60-2.36) | 0.002         | 4.20 (1.67-10.58) | 0.003         | 0.32 (0.15-0.69) |
|           | Additive      | G                   | 263 (62.6%)       | 229 (62.6%)       | 212 (53.0%)    | Ref              | -                | Ref           | -                 | Ref           | -                |
|           |               | A                   | 157 (37.4%)       | 137 (37.4%)       | 188 (47.0%)    | 0.490            | 1.12 (0.81-1.56) | 0.001         | 2.26 (1.40-7.63)  | 0.006         | 0.60 (0.42-0.86) |
|           | Dominant      | GG                  | 80 (38.1%)        | 70 (38.3%)        | 58 (29.0%)     | Ref              | -                | Ref           | -                 | Ref           | -                |
|           |               | GA+AA               | 130 (61.9%)       | 113 (61.7%)       | 142 (71.0%)    | 0.535            | 1.16 (0.73-1.85) | 0.007         | 2.73 (1.31-5.71)  | 0.093         | 0.63 (0.37-1.08) |
|           | Recessive     | GG+GA               | 183 (87.1%)       | 159 (86.9%)       | 154 (77.0%)    | Ref              | -                | Ref           | -                 | Ref           | -                |
|           |               | AA                  | 27 (12.9%)        | 24 (13.1%)        | 46 (23.0%)     | 0.614            | 1.19 (0.61-2.30) | 0.007         | 3.06 (1.36-6.87)  | 0.003         | 0.36 (0.19-0.71) |
|           | Overdominant  | GG+AA               | 107 (51.0%)       | 94 (51.4%)        | 104 (52.0%)    | Ref              | -                | Ref           | -                 | Ref           | -                |
|           |               | GA                  | 103 (49.0%)       | 89 (48.6%)        | 96 (48.0%)     | 0.793            | 1.06 (0.68-1.67) | 0.643         | 1.17 (0.61-2.26)  | 0.474         | 1.20 (0.73-1.99) |

| SNP        | Genetic Model | Genotype/<br>Allele | HAPE-f<br>(n=210) | HAPE-p<br>(n=183) | HLs<br>(n=200) | HAPE-p vs HAPE-f |                  | HLs vs HAPE-f |                  | HAPE-p vs HLs |                  |
|------------|---------------|---------------------|-------------------|-------------------|----------------|------------------|------------------|---------------|------------------|---------------|------------------|
|            |               |                     |                   |                   |                | p value          | OR (95%CI)       | p value       | OR (95%CI)       | p value       | OR (95%CI)       |
| rs10244797 | Codominant    | TT                  | 68 (32.4%)        | 64 (35.0%)        | 64 (32.0%)     | Ref              | -                | Ref           | -                | Ref           | -                |
|            |               | TC                  | 109 (51.9%)       | 86 (47.0%)        | 90 (45.0%)     | 0.858            | 1.05 (0.63-1.75) | 0.422         | 1.37 (0.64-2.94) | 0.954         | 1.02 (0.57-1.81) |
|            |               | CC                  | 33 (15.7%)        | 33 (18.0%)        | 46 (23.0%)     | 0.596            | 1.19 (0.63-2.23) | 0.109         | 2.02 (0.85-4.79) | 0.224         | 0.65 (0.32-1.31) |
|            | Additive      | T                   | 245 (58.3%)       | 214 (58.5%)       | 218 (54.5%)    | Ref              | -                | Ref           | -                | Ref           | -                |
|            |               | C                   | 175 (41.7%)       | 152 (41.5%)       | 182 (45.5%)    | 0.565            | 1.10 (0.80-1.52) | 0.090         | 1.49 (0.94-2.38) | 0.269         | 0.82 (0.57-1.17) |
|            | Dominant      | TT                  | 68 (32.4%)        | 64 (35.0%)        | 64 (32.0%)     | Ref              | -                | Ref           | -                | Ref           | -                |
|            |               | TC+CC               | 142 (67.6%)       | 119 (65.0%)       | 136 (68.0%)    | 0.752            | 1.08 (0.67-1.74) | 0.222         | 1.55 (0.77-3.15) | 0.652         | 0.88 (0.52-1.51) |
|            | Recessive     | TT+TC               | 177 (84.3%)       | 150 (82.0%)       | 154 (77.0%)    | Ref              | -                | Ref           | -                | Ref           | -                |
|            |               | CC                  | 33 (15.7%)        | 33 (18.0%)        | 46 (23.0%)     | 0.502            | 1.23 (0.68-2.23) | 0.124         | 1.87 (0.84-4.13) | 0.161         | 0.64 (0.34-1.20) |
|            | Overdominant  | TT+CC               | 101 (48.1%)       | 97 (53.0%)        | 110 (55.0%)    | Ref              | -                | Ref           | -                | Ref           | -                |
|            |               | TC                  | 109 (51.9%)       | 86 (47.0%)        | 90 (45.0%)     | 0.836            | 0.95 (0.61-1.50) | 0.935         | 0.97 (0.50-1.89) | 0.481         | 1.20 (0.72-1.98) |

SPSS 16.0 was used to obtain p values after adjusting with age and gender. Significance was maintained at  $\leq 0.05$  after FDR correction. *POT1*, protection of telomere 1; HAPE-f, HAPE-free; HAPE-p, HAPE-patients; HLs, Highlanders; n, number of samples; OR, odds ratio; CI, confidence interval; Ref, reference.

[B] Comparison of genotype and allele distribution in HLs with Han Chinese (CHB+CHS) population and Japanese (JPT) population.

| <i>POT1</i> |                     |                         |                     |                |                       |                   |            |                  |
|-------------|---------------------|-------------------------|---------------------|----------------|-----------------------|-------------------|------------|------------------|
| SNP         | Genotype/<br>Allele | CHB+CHS<br>(Ref, n=204) | JPT<br>(Ref, n=104) | HLs<br>(n=200) | HLs vs CHB+CHS        |                   | HLs vs JPT |                  |
|             |                     |                         |                     |                | p value               | OR (95%CI)        | p value    | OR (95%CI)       |
| rs727505    | CC                  | 89 (42.8%)              | 47 (45.2%)          | 113 (56.5%)    | Ref                   | -                 | Ref        | -                |
|             | CT                  | 94 (45.2%)              | 45 (43.3%)          | 71 (35.5%)     | 0.014                 | 0.59 (0.39-0.90)  | 0.101      | 0.66 (0.40-1.09) |
|             | TT                  | 25 (12.0%)              | 12 (11.5%)          | 16 (8.0%)      | 0.048                 | 0.50 (0.25-1.00)  | 0.156      | 0.55 (0.24-1.26) |
|             | C                   | 272 (65.4%)             | 139 (66.8%)         | 297 (74.3%)    | Ref                   | -                 | Ref        | -                |
|             | T                   | 144 (34.6%)             | 69 (33.2%)          | 103 (25.8%)    | 0.006                 | 0.66 (0.48-0.89)  | 0.054      | 0.70 (0.49-1.01) |
| rs17246404  | CC                  | 89 (42.8%)              | 47 (45.2%)          | 120 (60.0%)    | Ref                   | -                 | Ref        | -                |
|             | CT                  | 94 (45.2%)              | 45 (43.3%)          | 60 (30.0%)     | 0.001                 | 0.47 (0.31-0.72)  | 0.013      | 0.52 (0.31-0.87) |
|             | TT                  | 25 (12.0%)              | 12 (11.5%)          | 20 (10.0%)     | 0.113                 | 0.59 (0.31-1.14)  | 0.288      | 0.65 (0.30-1.44) |
|             | C                   | 272 (65.4%)             | 139 (66.8%)         | 300 (75.0%)    | Ref                   | -                 | Ref        | -                |
|             | T                   | 144 (34.6%)             | 69 (33.2%)          | 100 (25.0%)    | 0.003                 | 0.63 (0.47-0.85)  | 0.033      | 0.67 (0.47-0.97) |
| rs7794637   | CC                  | 143 (68.8%)             | 70 (67.3%)          | 105 (52.5%)    | Ref                   | -                 | Ref        | -                |
|             | CT                  | 60 (28.8%)              | 27 (26.0%)          | 82 (41.0%)     | 0.003                 | 1.86 (1.23-2.83)  | 0.008      | 2.02 (1.19-3.44) |
|             | TT                  | 5 (2.4%)                | 7 (6.7%)            | 13 (6.5%)      | 0.024                 | 3.54 (1.23-10.24) | 0.665      | 1.24 (0.47-3.26) |
|             | C                   | 346 (83.2%)             | 167 (80.3%)         | 292 (73.0%)    | Ref                   | -                 | Ref        | -                |
|             | T                   | 70 (16.8%)              | 41 (19.7%)          | 108 (27.0%)    | $4.35 \times 10^{-4}$ | 1.83 (1.30-2.57)  | 0.047      | 1.51 (1.00-2.26) |
| rs116916706 | CC                  | 208 (100%)              | 104 (100%)          | 143 (71.5%)    | Ref                   | -                 | Ref        | -                |
|             | CA                  | 0 (0%)                  | 0 (0%)              | 54 (27.0%)     | *                     | -                 | *          | -                |
|             | AA                  | 0 (0%)                  | 0 (0%)              | 3 (1.5%)       | *                     | -                 | *          | -                |
|             | C                   | 416 (100.0%)            | 208 (100.0%)        | 340 (85.0%)    | Ref                   | -                 | Ref        | -                |
|             | A                   | 0 (0.0%)                | 0 (0.0%)            | 60 (15.0%)     | *                     | -                 | *          | -                |

| SNP        | Genotype/<br>Allele | CHB+CHS<br>(Ref, n=204) | JPT<br>(Ref, n=104) | HLs<br>(n=200) | HLs vs CHB+CHS |                  | HLs vs JPT |                  |
|------------|---------------------|-------------------------|---------------------|----------------|----------------|------------------|------------|------------------|
|            |                     |                         |                     |                | p value        | OR (95%CI)       | p value    | OR (95%CI)       |
| rs4360236  | CC                  | 143 (68.8%)             | 70 (67.3%)          | 108 (54.0%)    | Ref            | -                | Ref        | -                |
|            | CT                  | 59 (28.4%)              | 27 (26.0%)          | 77 (38.5%)     | 0.011          | 1.73 (1.13-2.63) | 0.023      | 1.85 (1.09-3.15) |
|            | TT                  | 6 (2.9%)                | 7 (6.7%)            | 15 (7.5%)      | 0.012          | 3.31 (1.24-8.81) | 0.495      | 1.39 (0.54-3.58) |
|            | C                   | 345 (82.9%)             | 167 (80.3%)         | 293 (73.3%)    | Ref            | -                | Ref        | -                |
|            | T                   | 71 (17.1%)              | 41 (19.7%)          | 107 (26.8%)    | 0.001          | 1.77 (1.27-2.49) | 0.055      | 1.49 (0.99-2.24) |
| rs7782410  | GG                  | 70 (33.7%)              | 36 (34.6%)          | 58 (29.0%)     | Ref            | -                | Ref        | -                |
|            | GA                  | 102 (49.0%)             | 47 (45.2%)          | 96 (48.0%)     | 0.575          | 1.14 (0.73-1.77) | 0.391      | 1.27 (0.74-2.18) |
|            | AA                  | 36 (17.3%)              | 21 (20.2%)          | 46 (23.0%)     | 0.127          | 1.54 (0.88-2.69) | 0.363      | 1.36 (0.70-2.64) |
|            | G                   | 242 (58.2%)             | 119 (57.2%)         | 212 (53.0%)    | Ref            | -                | Ref        | -                |
|            | A                   | 174 (41.8%)             | 89 (42.8%)          | 188 (47.0%)    | 0.137          | 1.23 (0.94-1.63) | 0.323      | 1.19 (0.85-1.66) |
| rs10244797 | TT                  | 73 (35.1%)              | 39 (37.5%)          | 64 (32.0%)     | Ref            | -                | Ref        | -                |
|            | TC                  | 102 (49.0%)             | 45 (43.3%)          | 90 (45.0%)     | 1.000          | 1.01 (0.65-1.56) | 0.469      | 1.22 (0.71-2.08) |
|            | CC                  | 33 (15.9%)              | 20 (19.2%)          | 46 (23.0%)     | 0.103          | 1.59 (0.91-2.78) | 0.314      | 1.40 (0.73-2.71) |
|            | T                   | 248 (59.6%)             | 123 (59.1%)         | 218 (54.5%)    | Ref            | -                | Ref        | -                |
|            | C                   | 168 (40.4%)             | 85 (40.9%)          | 182 (45.5%)    | 0.140          | 1.23 (0.93-1.63) | 0.275      | 1.21 (0.86-1.70) |

SISA online tool was used to obtain p values. Significance was maintained at  $\leq 0.05$  after FDR correction. \*Analysis could not be performed because the representatives of a genotype and/or allele were absent in a study group. *POT1*, protection of telomere 1; CHB+CHS, Han Chinese population comprising of Han Chinese in Beijing (CHB) and Southern Han Chinese (CHS); JPT, Japanese population; HLs, highlanders; Ref, reference; n, number of samples; OR, odds ratio; CI, confidence interval.



Supplementary Table S7: Genotype and allele distribution of 2 SNPs of *ACD*

[A] Comparison of genotype and allele distribution among HAPE-f, HAPE-p and HLs.

| <i>ACD</i> |               |                     |                   |                   |                |                  |                  |                        |                      |                        |                  |
|------------|---------------|---------------------|-------------------|-------------------|----------------|------------------|------------------|------------------------|----------------------|------------------------|------------------|
| SNP        | Genetic Model | Genotype/<br>Allele | HAPE-f<br>(n=210) | HAPE-p<br>(n=183) | HLs<br>(n=200) | HAPE-p vs HAPE-f |                  | HLs vs HAPE-f          |                      | HAPE-p vs HLs          |                  |
|            |               |                     |                   |                   |                | p value          | OR (95%CI)       | p value                | OR (95%CI)           | p value                | OR (95%CI)       |
| rs72556537 | Codominant    | TT                  | 148 (70.4%)       | 151 (82.5%)       | 145 (72.5%)    | Ref              | -                | Ref                    | -                    | Ref                    | -                |
|            |               | TA                  | 52 (24.8%)        | 31 (17.0%)        | 48 (24.0%)     | 0.073            | 0.59 (0.34-1.05) | 0.138                  | 0.53 (0.23-1.23)     | 0.183                  | 0.65 (0.34-1.23) |
|            |               | AA                  | 10 (4.8%)         | 1 (0.5%)          | 7 (3.5%)       | 0.038            | 0.11 (0.01-0.88) | 0.346                  | 1.89 (0.50-7.08)     | 0.008                  | 0.05 (0.01-0.45) |
|            | Additive      | T                   | 348 (82.9%)       | 333 (91.0%)       | 338 (84.5%)    | Ref              | -                | Ref                    | -                    | Ref                    | -                |
|            |               | A                   | 72 (17.1%)        | 33 (9.0%)         | 62 (15.5%)     | 0.003            | 0.48 (0.29-0.78) | 0.778                  | 0.91 (0.49-1.71)     | 0.002                  | 0.43 (0.25-0.74) |
|            | Dominant      | TT                  | 148 (70.4%)       | 151 (82.5%)       | 145 (72.5%)    | Ref              | -                | Ref                    | -                    | Ref                    | -                |
|            |               | TA+AA               | 62 (29.6%)        | 32 (17.5%)        | 55 (27.5%)     | 0.015            | 0.51 (0.29-0.88) | 0.369                  | 0.71 (0.34-1.49)     | 0.027                  | 0.50 (0.27-0.92) |
|            | Recessive     | TT+TA               | 200 (95.2%)       | 182 (99.5%)       | 193 (96.5%)    | Ref              | -                | Ref                    | -                    | Ref                    | -                |
|            |               | AA                  | 10 (4.8%)         | 1 (0.5%)          | 7 (3.5%)       | 0.046            | 0.12 (0.01-0.97) | 0.265                  | 2.10 (0.57-7.72)     | 0.007                  | 0.05 (0.01-0.43) |
|            | Overdominant  | TT+AA               | 158 (75.2%)       | 152 (83.0%)       | 152 (76.0%)    | Ref              | -                | Ref                    | -                    | Ref                    | -                |
|            |               | TA                  | 52 (24.8%)        | 31 (17.0%)        | 48 (24.0%)     | 0.115            | 0.63 (0.36-1.12) | 0.115                  | 0.51 (0.23-1.18)     | 0.278                  | 0.71 (0.38-1.32) |
| rs6979     | Codominant    | GG                  | 67 (31.9%)        | 54 (29.5%)        | 18 (9.0%)      | Ref              | -                | Ref                    | -                    | Ref                    | -                |
|            |               | GA                  | 110 (52.4%)       | 101 (55.2%)       | 74 (37.0%)     | 0.828            | 1.06 (0.64-1.74) | 0.011                  | 4.54 (1.41-14.62)    | 0.334                  | 0.68 (0.31-1.49) |
|            |               | AA                  | 33 (15.7%)        | 28 (15.3%)        | 108 (54.0%)    | 0.982            | 1.01 (0.50-2.02) | $3.05 \times 10^{-7}$  | 41.88 (10.03-174.91) | $3.74 \times 10^{-8}$  | 0.07 (0.03-0.18) |
|            | Additive      | G                   | 244 (58.1%)       | 209 (57.1%)       | 110 (27.5%)    | Ref              | -                | Ref                    | -                    | Ref                    | -                |
|            |               | A                   | 176 (41.9%)       | 157 (42.9%)       | 290 (72.5%)    | 0.844            | 1.03 (0.75-1.43) | $3.34 \times 10^{-12}$ | 7.34 (4.19-12.86)    | $5.62 \times 10^{-12}$ | 0.26 (0.18-0.38) |
|            | Dominant      | GG                  | 67 (31.9%)        | 54 (29.5%)        | 18 (9.0%)      | Ref              | -                | Ref                    | -                    | Ref                    | -                |
|            |               | GA+AA               | 143 (68.1%)       | 129 (70.5%)       | 182 (91.0%)    | 0.820            | 1.06 (0.65-1.72) | $1.42 \times 10^{-5}$  | 11.69 (3.85-35.48)   | $4.92 \times 10^{-4}$  | 0.29 (0.14-0.58) |
|            | Recessive     | GG+GA               | 177 (84.3%)       | 155 (84.7%)       | 92 (46.0%)     | Ref              | -                | Ref                    | -                    | Ref                    | -                |
|            |               | AA                  | 33 (15.7%)        | 28 (15.3%)        | 108 (54.0%)    | 0.929            | 1.03 (0.55-1.91) | $2.52 \times 10^{-10}$ | 16.20 (6.83-38.39)   | $2.87 \times 10^{-12}$ | 0.11 (0.06-0.20) |
|            | Overdominant  | GG+AA               | 100 (47.6%)       | 82 (44.8%)        | 126 (63.0%)    | Ref              | -                | Ref                    | -                    | Ref                    | -                |
|            |               | GA                  | 110 (52.4%)       | 101 (55.2%)       | 74 (37.0%)     | 0.883            | 1.03 (0.66-1.63) | 0.004                  | 0.36 (0.18-0.73)     | $2.63 \times 10^{-5}$  | 3.23 (1.87-5.58) |

SPSS 16.0 was used to obtain p values after adjusting with age and gender. Significance was maintained at  $\leq 0.05$  after FDR correction. *ACD*, ACD shelterin complex subunit and telomerase recruitment factor; HAPE-f, HAPE-free; HAPE-p, HAPE-patients; HLs, Highlanders; n, number of samples; OR, odds ratio; CI, confidence interval; Ref, reference.

[B] Comparison of genotype and allele distribution in HLs with Han Chinese (CHB+CHS) population and Japanese (JPT) population.

| <i>ACD</i> |                     |                         |                     |                |                       |                  |                       |                    |
|------------|---------------------|-------------------------|---------------------|----------------|-----------------------|------------------|-----------------------|--------------------|
| SNP        | Genotype/<br>Allele | CHB+CHS<br>(Ref, n=204) | JPT<br>(Ref, n=104) | HLs<br>(n=200) | HLs vs CHB+CHS        |                  | HLs vs JPT            |                    |
|            |                     |                         |                     |                | p value               | OR (95%CI)       | p value               | OR (95%CI)         |
| rs72556537 | TT                  | 0 (0%)                  | 0 (0%)              | 145 (72.5%)    | Ref                   | -                | Ref                   | -                  |
|            | TA                  | 0 (0%)                  | 4 (3.8%)            | 48 (24.0%)     | *                     | -                | *                     | -                  |
|            | AA                  | 208 (100%)              | 100 (96.2%)         | 7 (3.5%)       | *                     | -                | *                     | -                  |
|            | T                   | 0 (0.0%)                | 4 (1.9%)            | 338 (84.5%)    | Ref                   | -                | Ref                   | -                  |
|            | A                   | 416 (100.0%)            | 204 (98.1%)         | 62 (15.5%)     | *                     | -                | <0.000001             | 0.004 (0.001-0.01) |
| rs6979     | GG                  | 4 (1.9%)                | 4 (3.8%)            | 18 (9.0%)      | Ref                   | -                | Ref                   | -                  |
|            | GA                  | 50 (24.0%)              | 22 (21.2%)          | 74 (37.0%)     | 0.056                 | 3.04 (0.97-9.52) | 0.779                 | 1.34 (0.41-4.37)   |
|            | AA                  | 154 (74.0%)             | 78 (75.0%)          | 108 (54.0%)    | $2.50 \times 10^{-4}$ | 0.16 (0.05-0.47) | 0.031                 | 0.31 (0.10-0.95)   |
|            | G                   | 58 (13.9%)              | 30 (14.4%)          | 110 (27.5%)    | Ref                   | -                | Ref                   | -                  |
|            | A                   | 358 (86.1%)             | 178 (85.6%)         | 290 (72.5%)    | $2.00 \times 10^{-6}$ | 0.43 (0.30-0.61) | $2.80 \times 10^{-4}$ | 0.44 (0.29-0.69)   |

SISA online tool was used to obtain p values. Significance was maintained at  $\leq 0.05$  after FDR correction. \*Analysis could not be performed because the representatives of a genotype and/or allele were absent in a study group. *ACD*, ACD shelterin complex subunit and telomerase recruitment factor; CHB+CHS, Han Chinese population comprising of Han Chinese in Beijing (CHB) and Southern Han Chinese (CHS); JPT, Japanese population; HLs, highlanders; Ref, reference; n, number of samples; OR, odds ratio; CI, confidence interval.

Supplementary Table S8: Genotype and allele distribution of 4 SNPs of *TERF2IP*

[A] Comparison of genotype and allele distribution among HAPE-f, HAPE-p and HLs.

| TERF2IP      |               |                     |                   |                   |                |                  |                         |                         |                         |                          |                      |
|--------------|---------------|---------------------|-------------------|-------------------|----------------|------------------|-------------------------|-------------------------|-------------------------|--------------------------|----------------------|
| SNP          | Genetic Model | Genotype/<br>Allele | HAPE-f<br>(n=210) | HAPE-p<br>(n=183) | HLs<br>(n=200) | HAPE-p vs HAPE-f |                         | HLs vs HAPE-f           |                         | HAPE-p vs HLs            |                      |
|              |               |                     |                   |                   |                | p value          | OR (95%CI)              | p value                 | OR (95%CI)              | p value                  | OR (95%CI)           |
| rs76937292   | Codominant    | CC                  | 202 (96.2%)       | 169 (92.3%)       | 190 (95.0%)    | Ref              | -                       | Ref                     | -                       | Ref                      | -                    |
|              |               | CT                  | 4 (1.9%)          | 6 (3.3%)          | 2 (1.0%)       | 0.226            | 0.38 (0.08-1.82)        | 3.29 × 10 <sup>-4</sup> | 0.01 (0.001-0.11)       | 0.227                    | 3.25 (0.48-22.06)    |
|              |               | TT                  | 4 (1.9%)          | 8 (4.4%)          | 8 (4.0%)       | 0.655            | 1.38 (0.34-5.59)        | 0.306                   | 0.36 (0.05-2.56)        | 0.931                    | 0.95 (0.27-3.33)     |
|              | Additive      | C                   | 408 (97.1%)       | 344 (94.0%)       | 382 (95.5%)    | Ref              | -                       | Ref                     | -                       | Ref                      | -                    |
|              |               | T                   | 12 (2.9%)         | 22 (6.0%)         | 18 (4.5%)      | 0.913            | 1.05 (0.46-2.41)        | 0.004                   | 0.20 (0.06-0.60)        | 0.655                    | 1.20 (0.54-2.67)     |
|              | Dominant      | CC                  | 202 (96.2%)       | 169 (92.3%)       | 190 (95.0%)    | Ref              | -                       | Ref                     | -                       | Ref                      | -                    |
| CT+TT        |               | 8 (3.8%)            | 14 (7.7%)         | 10 (5.0%)         | 0.781          | 0.86 (0.30-2.47) | 0.003                   | 0.11 (0.02-0.47)        | 0.508                   | 1.42 (0.50-4.02)         |                      |
| Recessive    | CC+CT         | 206 (98.1%)         | 175 (95.6%)       | 192 (96.0%)       | Ref            | -                | Ref                     | -                       | Ref                     | -                        |                      |
|              | TT            | 4 (1.9%)            | 8 (4.4%)          | 8 (4.0%)          | 0.598          | 1.45 (0.37-5.70) | 0.439                   | 0.48 (0.07-3.10)        | 0.911                   | 0.93 (0.26-3.30)         |                      |
| Overdominant | CC+TT         | 206 (98.1%)         | 177 (96.7%)       | 198 (99.0%)       | Ref            | -                | Ref                     | -                       | Ref                     | -                        |                      |
|              | CT            | 4 (1.9%)            | 6 (3.3%)          | 2 (1.0%)          | 0.288          | 0.44 (0.09-2.01) | 0.001                   | 0.01 (0.001-0.15)       | 0.230                   | 3.23 (0.48-21.97)        |                      |
| rs59297469   | Codominant    | GG                  | 73 (34.8%)        | 40 (21.9%)        | 138 (69.0%)    | Ref              | -                       | Ref                     | -                       | Ref                      | -                    |
|              |               | GT                  | 105 (50.0%)       | 92 (50.2%)        | 57 (28.5%)     | 0.575            | 1.17 (0.68-2.01)        | 1.23 × 10 <sup>-4</sup> | 0.22 (0.10-0.47)        | 1.00 × 10 <sup>-10</sup> | 8.48 (4.43-16.20)    |
|              |               | TT                  | 32 (15.2%)        | 51 (27.9%)        | 5 (2.5%)       | 0.037            | 1.98 (1.04-3.75)        | 8.62 × 10 <sup>-6</sup> | 0.02 (0.004-0.12)       | 1.03 × 10 <sup>-8</sup>  | 69.64 (16.29-297.67) |
|              | Additive      | G                   | 251 (59.8%)       | 172 (47.0%)       | 333 (83.2%)    | Ref              | -                       | Ref                     | -                       | Ref                      | -                    |
|              |               | T                   | 169 (40.2%)       | 194 (53.0%)       | 67 (16.8%)     | 0.082            | 1.33 (0.96-1.83)        | 2.25 × 10 <sup>-9</sup> | 0.16 (0.09-0.29)        | 3.19 × 10 <sup>-18</sup> | 6.81 (4.42-10.49)    |
|              | Dominant      | GG                  | 73 (34.8%)        | 40 (21.9%)        | 138 (69.0%)    | Ref              | -                       | Ref                     | -                       | Ref                      | -                    |
|              |               | GT+TT               | 137 (65.2%)       | 143 (78.1%)       | 62 (31.0%)     | 0.245            | 1.35 (0.82-2.23)        | 4.96 × 10 <sup>-7</sup> | 0.14 (0.07-0.31)        | 1.00 × 10 <sup>-14</sup> | 12.46 (6.58-23.60)   |
|              | Recessive     | GG+GT               | 178 (84.8%)       | 132 (72.1%)       | 195 (97.5%)    | Ref              | -                       | Ref                     | -                       | Ref                      | -                    |
| TT           |               | 32 (15.2%)          | 51 (27.9%)        | 5 (2.5%)          | 0.091          | 1.61 (0.93-2.80) | 3.63 × 10 <sup>-5</sup> | 0.03 (0.01-0.16)        | 1.12 × 10 <sup>-6</sup> | 14.04 (4.85-40.66)       |                      |
| Overdominant | GG+TT         | 105 (50.0%)         | 91 (49.8%)        | 143 (71.5%)       | Ref            | -                | Ref                     | -                       | Ref                     | -                        |                      |
|              | GT            | 105 (50.0%)         | 92 (50.2%)        | 57 (28.5%)        | 0.738          | 0.93 (0.59-1.45) | 0.013                   | 0.42 (0.21-0.83)        | 6.76 × 10 <sup>-6</sup> | 3.63 (2.07-6.36)         |                      |

| SNP       | Genetic Model | Genotype/<br>Allele | HAPE-f<br>(n=210) | HAPE-p<br>(n=183) | HLs<br>(n=200) | HAPE-p vs HAPE-f |                   | HLs vs HAPE-f    |                   | HAPE-p vs HLs    |                  |
|-----------|---------------|---------------------|-------------------|-------------------|----------------|------------------|-------------------|------------------|-------------------|------------------|------------------|
|           |               |                     |                   |                   |                | p value          | OR (95%CI)        | p value          | OR (95%CI)        | p value          | OR (95%CI)       |
| rs2233810 | Codominant    | CC                  | 180 (85.7%)       | 161 (88.0%)       | 188 (94.0%)    | Ref              | -                 | Ref              | -                 | Ref              | -                |
|           |               | CA                  | 26 (12.4%)        | 17 (9.3%)         | 10 (5.0%)      | 0.852            | 0.93 (0.46-1.91)  | 0.025            | 0.13 (0.02-0.78)  | 0.049            | 2.94 (1.00-8.59) |
|           |               | AA                  | 4 (1.9%)          | 5 (2.7%)          | 2 (1.0%)       | 0.376            | 2.00 (0.43-9.35)  | 0.307            | 3.24 (0.34-30.78) | 0.911            | 1.12 (0.16-7.71) |
|           | Additive      | C                   | 386 (91.9%)       | 339 (92.6%)       | 386 (96.5%)    | Ref              | -                 | Ref              | -                 | Ref              | -                |
|           |               | A                   | 34 (8.1%)         | 27 (7.4%)         | 14 (3.5%)      | 0.624            | 1.16 (0.64-1.09)  | 0.263            | 0.48 (0.13-1.74)  | 0.112            | 2.01 (0.85-4.76) |
|           | Dominant      | CC                  | 180 (85.7%)       | 161 (88.0%)       | 188 (94.0%)    | Ref              | -                 | Ref              | -                 | Ref              | -                |
|           |               | CA+AA               | 30 (14.3%)        | 22 (12.0%)        | 12 (6.0%)      | 0.879            | 1.05 (0.55-2.03)  | 0.100            | 0.29 (0.07-1.27)  | 0.078            | 2.37 (0.91-6.18) |
|           | Recessive     | CC+CA               | 206 (98.1%)       | 178 (97.3%)       | 198 (99.0%)    | Ref              | -                 | Ref              | -                 | Ref              | -                |
|           |               | AA                  | 4 (1.9%)          | 5 (2.7%)          | 2 (1.0%)       | 0.341            | 2.12 (0.45-9.94)  | 0.240            | 3.87 (0.41-36.88) | 0.989            | 1.01 (0.15-7.09) |
|           | Overdominant  | CC+AA               | 184 (87.6%)       | 166 (90.7%)       | 190 (95.0%)    | Ref              | -                 | Ref              | -                 | Ref              | -                |
| CA        |               | 26 (12.4%)          | 17 (9.3%)         | 10 (5.0%)         | 0.800          | 0.91 (0.45-1.85) | 0.025             | 0.15 (0.03-0.79) | 0.051             | 2.86 (1.00-8.22) |                  |
| rs488444  | Codominant    | AA                  | 199 (94.7%)       | 165 (90.2%)       | 187 (93.5%)    | Ref              | -                 | Ref              | -                 | Ref              | -                |
|           |               | AG                  | 10 (4.8%)         | 17 (9.3%)         | 10 (5.0%)      | 0.259            | 1.68 (0.68-4.15)  | 0.458            | 1.69 (0.42-6.69)  | 0.206            | 1.89 (0.70-5.09) |
|           |               | GG                  | 1 (0.5%)          | 1 (0.5%)          | 3 (1.5%)       | 0.851            | 0.76 (0.04-13.71) | 0.367            | 3.95 (0.20-78.34) | 0.236            | 0.21 (0.02-2.80) |
|           | Additive      | A                   | 408 (97.1%)       | 347 (94.8%)       | 384 (96.0%)    | Ref              | -                 | Ref              | -                 | Ref              | -                |
|           |               | G                   | 12 (2.9%)         | 19 (5.2%)         | 16 (4.0%)      | 0.362            | 1.46 (0.65-3.32)  | 0.192            | 2.10 (0.69-6.44)  | 0.751            | 1.14 (0.50-2.64) |
|           | Dominant      | AA                  | 199 (94.7%)       | 165 (90.2%)       | 187 (93.5%)    | Ref              | -                 | Ref              | -                 | Ref              | -                |
|           |               | AG+GG               | 11 (5.3%)         | 18 (9.8%)         | 13 (6.5%)      | 0.302            | 1.58 (0.66-3.75)  | 0.297            | 1.93 (0.56-6.68)  | 0.432            | 1.44 (0.58-3.59) |
|           | Recessive     | AA+AG               | 209 (99.5%)       | 182 (99.5%)       | 197 (98.5%)    | Ref              | -                 | Ref              | -                 | Ref              | -                |
|           |               | GG                  | 1 (0.5%)          | 1 (0.5%)          | 3 (1.5%)       | 0.818            | 0.71 (0.04-13.00) | 0.377            | 3.86 (0.19-77.57) | 0.228            | 0.20 (0.02-2.71) |
|           | Overdominant  | AA+GG               | 200 (95.2%)       | 166 (90.7%)       | 190 (95.0%)    | Ref              | -                 | Ref              | -                 | Ref              | -                |
| AG        |               | 10 (4.8%)           | 17 (9.3%)         | 10 (5.0%)         | 0.255          | 1.69 (0.69-4.16) | 0.477             | 1.65 (0.42-6.48) | 0.194             | 1.93 (0.72-5.18) |                  |

SPSS 16.0 was used to obtain p values after adjusting with age and gender. Significance was maintained at  $\leq 0.05$  after FDR correction. *TERF2IP*, TERF2-interacting protein; HAPE-f, HAPE-free; HAPE-p, HAPE-patients; HLs, Highlanders; n, number of samples; OR, odds ratio; CI, confidence interval; Ref, reference.

[B] Comparison of genotype and allele distribution in HLs with Han Chinese (CHB+CHS) population and Japanese (JPT) population.

| <i>TERF2IP</i> |                     |                         |                     |                |                |                  |                |                   |
|----------------|---------------------|-------------------------|---------------------|----------------|----------------|------------------|----------------|-------------------|
| SNP            | Genotype/<br>Allele | CHB+CHS<br>(Ref, n=204) | JPT<br>(Ref, n=104) | HLs<br>(n=200) | HLs vs CHB+CHS |                  | HLs vs CHB+CHS |                   |
|                |                     |                         |                     |                | p value        | OR (95%CI)       | p value        | OR (95%CI)        |
| rs76937292     | CC                  | 208 (100%)              | 104 (100%)          | 190 (95.0%)    | Ref            | -                | Ref            | -                 |
|                | CT                  | 0 (0%)                  | 0 (0%)              | 2 (1.0%)       | *              | -                | *              | -                 |
|                | TT                  | 0 (0%)                  | 0 (0%)              | 8 (4.0%)       | *              | -                | *              | -                 |
|                | C                   | 416 (100.0%)            | 208 (100.0%)        | 382 (95.5%)    | Ref            | -                | Ref            | -                 |
|                | T                   | 0 (0.0%)                | 0 (0.0%)            | 18 (4.5%)      | *              | -                | *              | -                 |
| rs59297469     | GG                  | 157 (75.5%)             | 80 (76.9%)          | 138 (69.0%)    | Ref            | -                | Ref            | -                 |
|                | GT                  | 45 (21.6%)              | 21 (20.2%)          | 57 (28.5%)     | 0.113          | 1.44 (0.92-2.27) | 0.118          | 1.57 (0.89-2.79)  |
|                | TT                  | 6 (2.9%)                | 3 (2.9%)            | 5 (2.5%)       | 1.000          | 0.95 (0.28-3.18) | 1.000          | 0.97 (0.23-4.15)  |
|                | G                   | 359 (86.3%)             | 181 (87.0%)         | 333 (83.3%)    | Ref            | -                | Ref            | -                 |
|                | T                   | 57 (13.7%)              | 27 (13.0%)          | 67 (16.8%)     | 0.225          | 1.27 (0.86-1.86) | 0.223          | 1.35 (0.83-2.18)  |
| rs2233810      | CC                  | 197 (94.7%)             | 102 (98.1%)         | 188 (94.0%)    | Ref            | -                | Ref            | -                 |
|                | CA                  | 11 (5.3%)               | 2 (1.9%)            | 10 (5.0%)      | 1.000          | 0.95 (0.40-2.30) | 0.186          | 2.71 (0.58-12.62) |
|                | AA                  | 0 (0.0%)                | 0 (0.0%)            | 2 (1.0%)       | *              | -                | *              | -                 |
|                | C                   | 405 (97.4%)             | 206 (99.0%)         | 386 (96.5%)    | Ref            | -                | Ref            | -                 |
|                | A                   | 11 (2.6%)               | 2 (1.0%)            | 14 (3.5%)      | 0.478          | 1.34 (0.60-2.98) | 0.105          | 3.74 (0.84-16.60) |
| rs4888444      | AA                  | 208 (100%)              | 104 (100%)          | 187 (93.5%)    | Ref            | -                | Ref            | -                 |
|                | AG                  | 0 (0%)                  | 0 (0%)              | 10 (5.0%)      | *              | -                | *              | -                 |
|                | GG                  | 0 (0%)                  | 0 (0%)              | 3 (1.5%)       | *              | -                | *              | -                 |
|                | A                   | 416 (100.0%)            | 208 (100.0%)        | 384 (96.0%)    | Ref            | -                | Ref            | -                 |
|                | G                   | 0 (0.0%)                | 0 (0.0%)            | 16 (4.0%)      | *              | -                | *              | -                 |

SISA online tool was used to obtain p values. Significance was maintained at  $\leq 0.05$  after FDR correction. \*Analysis could not be performed because the representatives of a genotype and/or allele were absent in a study group. *TERF2IP*, TERF2-interacting protein; CHB+CHS, Han Chinese population comprising of Han Chinese in Beijing (CHB) and Southern Han Chinese (CHS); JPT, Japanese population; HLs, highlanders; Ref, reference; n, number of samples; OR, odds ratio; CI, confidence interval.

Supplementary Table S9: Genotype and allele distribution of 9 SNPs of *TERT*

[A] Comparison of genotype and allele distribution among HAPE-f, HAPE-p and HLs.

| <i>TERT</i> |               |                     |                   |                   |                |                  |                  |                       |                  |                       |                   |
|-------------|---------------|---------------------|-------------------|-------------------|----------------|------------------|------------------|-----------------------|------------------|-----------------------|-------------------|
| SNP         | Genetic Model | Genotype/<br>Allele | HAPE-f<br>(n=210) | HAPE-p<br>(n=183) | HLs<br>(n=200) | HAPE-p vs HAPE-f |                  | HLs vs HAPE-f         |                  | HAPE-p vs HLs         |                   |
|             |               |                     |                   |                   |                | p value          | OR (95%CI)       | p value               | OR (95%CI)       | p value               | OR (95%CI)        |
| rs2736122   | Codominant    | CC                  | 128 (61.0%)       | 121 (66.1%)       | 176 (88.0%)    | Ref              | -                | Ref                   | -                | Ref                   | -                 |
|             |               | CT                  | 72 (34.2%)        | 52 (28.4%)        | 24 (12.0%)     | 0.312            | 0.77 (0.47-1.27) | $3.54 \times 10^{-4}$ | 0.17 (0.07-0.46) | $1.81 \times 10^{-5}$ | 4.59 (2.29-9.21)  |
|             |               | TT                  | 10 (4.8%)         | 10 (5.5%)         | 0 (0.0%)       | 0.417            | 1.51 (0.56-4.05) | *                     | -                | *                     | -                 |
|             | Additive      | C                   | 328 (78.1%)       | 294 (80.3%)       | 376 (94.0%)    | Ref              | -                | Ref                   | -                | Ref                   | -                 |
|             |               | T                   | 92 (21.9%)        | 72 (19.7%)        | 24 (6.0%)      | 0.918            | 0.98 (0.66-1.45) | $2.54 \times 10^{-5}$ | 0.16 (0.07-0.38) | $1.80 \times 10^{-6}$ | 4.40 (2.40-8.09)  |
|             | Dominant      | CC                  | 128 (61.0%)       | 121 (66.1%)       | 176 (88.0%)    | Ref              | -                | Ref                   | -                | Ref                   | -                 |
|             |               | CT+TT               | 82 (39.0%)        | 62 (33.9%)        | 24 (12.0%)     | 0.542            | 0.86 (0.54-1.38) | $8.47 \times 10^{-5}$ | 0.15 (0.06-0.39) | $3.81 \times 10^{-6}$ | 5.00 (2.53-9.90)  |
|             | Recessive     | CC+CT               | 200 (95.2%)       | 173 (94.5%)       | 200 (100.0%)   | Ref              | -                | Ref                   | -                | Ref                   | -                 |
|             |               | TT                  | 10 (4.8%)         | 10 (5.5%)         | 0 (0.0%)       | 0.299            | 1.69 (0.63-4.53) | *                     | -                | *                     | -                 |
|             | Overdominant  | CC+TT               | 138 (65.8%)       | 131 (71.6%)       | 176 (88.0%)    | Ref              | -                | Ref                   | -                | Ref                   | -                 |
|             |               | CT                  | 72 (34.2%)        | 52 (28.4%)        | 24 (12.0%)     | 0.255            | 0.75 (0.46-1.23) | 0.001                 | 0.20 (0.08-0.50) | $3.13 \times 10^{-5}$ | 4.44 (2.20-8.97)  |
| rs2075786   | Codominant    | TT                  | 52 (24.8%)        | 47 (25.7%)        | 124 (62.0%)    | Ref              | -                | Ref                   | -                | Ref                   | -                 |
|             |               | TC                  | 111 (52.9%)       | 92 (50.3%)        | 64 (32.0%)     | 0.931            | 1.02 (0.59-1.79) | $4.89 \times 10^{-6}$ | 0.15 (0.07-0.34) | $2.53 \times 10^{-7}$ | 4.55 (2.56-8.10)  |
|             |               | CC                  | 47 (22.3%)        | 44 (24.0%)        | 12 (6.0%)      | 0.576            | 1.20 (0.63-2.29) | $1.44 \times 10^{-5}$ | 0.07 (0.02-0.23) | $4.82 \times 10^{-6}$ | 7.27 (3.11-17.02) |
|             | Additive      | T                   | 215 (51.2%)       | 186 (50.8%)       | 312 (78.0%)    | Ref              | -                | Ref                   | -                | Ref                   | -                 |
|             |               | C                   | 205 (48.8%)       | 180 (49.2%)       | 88 (22.0%)     | 0.543            | 1.10 (0.80-1.52) | $6.09 \times 10^{-9}$ | 0.19 (0.11-0.33) | $1.66 \times 10^{-9}$ | 3.34 (2.26-4.95)  |
|             | Dominant      | TT                  | 52 (24.8%)        | 47 (25.7%)        | 124 (62.0%)    | Ref              | -                | Ref                   | -                | Ref                   | -                 |
|             |               | TC+CC               | 158 (75.2%)       | 136 (74.3%)       | 76 (38.0%)     | 0.807            | 1.07 (0.63-1.79) | $5.60 \times 10^{-8}$ | 0.12 (0.06-0.26) | $3.17 \times 10^{-9}$ | 5.31 (3.06-9.23)  |
|             | Recessive     | TT+TC               | 163 (77.7%)       | 139 (76.0%)       | 188 (94.0%)    | Ref              | -                | Ref                   | -                | Ref                   | -                 |
|             |               | CC                  | 47 (22.3%)        | 44 (24.0%)        | 12 (6.0%)      | 0.443            | 1.23 (0.72-2.10) | 0.001                 | 0.12 (0.04-0.41) | 0.003                 | 3.44 (1.54-7.70)  |
|             | Overdominant  | TT+CC               | 99 (47.1%)        | 91 (49.7%)        | 136 (68.0%)    | Ref              | -                | Ref                   | -                | Ref                   | -                 |
|             |               | TC                  | 111 (52.9%)       | 92 (50.3%)        | 64 (32.0%)     | 0.663            | 0.90 (0.58-1.42) | 0.001                 | 0.31 (0.15-0.63) | $1.09 \times 10^{-4}$ | 2.93 (1.70-5.05)  |

| SNP        | Genetic Model | Genotype/<br>Allele | HAPE-f<br>(n=210)         | HAPE-p<br>(n=183)         | HLs<br>(n=200)            | HAPE-p vs HAPE-f |                       | HLs vs HAPE-f |                       | HAPE-p vs HLs |                       |
|------------|---------------|---------------------|---------------------------|---------------------------|---------------------------|------------------|-----------------------|---------------|-----------------------|---------------|-----------------------|
|            |               |                     |                           |                           |                           | p value          | OR (95%CI)            | p value       | OR (95%CI)            | p value       | OR (95%CI)            |
| rs4246742  | Codominant    | AA                  | 133 (63.4%)               | 121 (66.1%)               | 126 (63.0%)               | Ref              | -                     | Ref           | -                     | Ref           | -                     |
|            |               | AT                  | 66 (31.4%)                | 55 (30.1%)                | 55 (27.5%)                | 0.983            | 0.99 (0.60-1.64)      | 0.377         | 1.39 (0.67-2.91)      | 0.706         | 1.12 (0.63-1.96)      |
|            |               | TT                  | 11 (5.2%)                 | 7 (3.8%)                  | 19 (9.5%)                 | 0.600            | 0.75 (0.26-2.18)      | 0.594         | 1.39 (0.42-4.60)      | 0.121         | 0.41 (0.13-1.26)      |
|            | Additive      | A                   | 332 (79.0%)               | 297 (81.1%)               | 307 (76.8%)               | Ref              | -                     | Ref           | -                     | Ref           | -                     |
|            |               | T                   | 88 (21.0%)                | 69 (18.9%)                | 93 (23.2%)                | 0.719            | 0.93 (0.62-1.38)      | 0.317         | 1.32 (0.76-2.29)      | 0.384         | 0.82 (0.53-1.28)      |
|            | Dominant      | AA<br>AT+TT         | 133 (63.4%)<br>77 (36.6%) | 121 (66.1%)<br>62 (33.9%) | 126 (63.0%)<br>74 (37.0%) | Ref<br>0.852     | -<br>0.96 (0.60-1.53) | Ref<br>0.327  | -<br>1.40 (0.71-2.77) | Ref<br>0.817  | -<br>0.94 (0.56-1.59) |
| rs10069690 | Codominant    | AA+AT               | 199 (94.8%)               | 176 (96.2%)               | 181 (90.5%)               | Ref              | -                     | Ref           | -                     | Ref           | -                     |
|            |               | TT                  | 11 (5.2%)                 | 7 (3.8%)                  | 19 (9.5%)                 | 0.593            | 0.75 (0.25-2.18)      | 0.670         | 1.30 (0.39-4.29)      | 0.111         | 0.41 (0.14-1.22)      |
|            |               | AA+TT<br>AT         | 144 (68.6%)<br>66 (31.4%) | 128 (69.9%)<br>55 (30.1%) | 145 (72.5%)<br>55 (27.5%) | Ref<br>0.956     | -<br>1.01 (0.62-1.65) | Ref<br>0.425  | -<br>1.34 (0.65-2.77) | Ref<br>0.541  | -<br>1.19 (0.68-2.07) |
|            | Additive      | CC                  | 108 (51.4%)               | 98 (53.6%)                | 132 (66.0%)               | Ref              | -                     | Ref           | -                     | Ref           | -                     |
|            |               | CT                  | 87 (41.4%)                | 70 (38.2%)                | 60 (30.0%)                | 0.947            | 1.02 (0.63-1.64)      | 0.027         | 0.43 (0.21-0.91)      | 0.016         | 1.98 (1.14-3.46)      |
|            |               | TT                  | 15 (7.2%)                 | 15 (8.2%)                 | 8 (4.0%)                  | 0.255            | 1.65 (0.70-3.91)      | 0.401         | 0.49 (0.09-2.58)      | 0.161         | 2.26 (0.72-7.03)      |
|            | Dominant      | C                   | 303 (72.1%)               | 266 (72.7%)               | 324 (81.0%)               | Ref              | -                     | Ref           | -                     | Ref           | -                     |
|            |               | T                   | 117 (27.9%)               | 100 (27.3%)               | 76 (19.0%)                | 0.410            | 1.16 (0.81-1.66)      | 0.036         | 0.53 (0.30-0.96)      | 0.011         | 1.76 (1.14-2.73)      |
|            | Recessive     | CC                  | 108 (51.4%)               | 98 (53.6%)                | 132 (66.0%)               | Ref              | -                     | Ref           | -                     | Ref           | -                     |
|            |               | CT+TT               | 102 (48.6%)               | 85 (46.4%)                | 68 (34.0%)                | 0.683            | 1.10 (0.70-1.73)      | 0.022         | 0.44 (0.22-0.89)      | 0.009         | 2.03 (1.19-3.45)      |
|            | Overdominant  | CC+CT               | 195 (92.8%)               | 168 (91.8%)               | 192 (96.0%)               | Ref              | -                     | Ref           | -                     | Ref           | -                     |
|            |               | TT                  | 15 (7.2%)                 | 15 (8.2%)                 | 8 (4.0%)                  | 0.229            | 1.67 (0.72-3.88)      | 0.629         | 0.66 (0.12-3.63)      | 0.321         | 1.80 (0.56-5.71)      |
|            | Overdominant  | CC+TT               | 123 (58.6%)               | 113 (61.8%)               | 140 (70.0%)               | Ref              | -                     | Ref           | -                     | Ref           | -                     |
|            |               | CT                  | 87 (41.4%)                | 70 (38.2%)                | 60 (30.0%)                | 0.817            | 0.95 (0.60-1.50)      | 0.032         | 0.45 (0.22-0.93)      | 0.026         | 1.87 (1.08-3.23)      |

| SNP       | Genetic Model | Genotype/<br>Allele | HAPE-f<br>(n=210) | HAPE-p<br>(n=183) | HLs<br>(n=200) | HAPE-p vs HAPE-f |                  | HLs vs HAPE-f |                  | HAPE-p vs HLs           |                  |
|-----------|---------------|---------------------|-------------------|-------------------|----------------|------------------|------------------|---------------|------------------|-------------------------|------------------|
|           |               |                     |                   |                   |                | p value          | OR (95%CI)       | p value       | OR (95%CI)       | p value                 | OR (95%CI)       |
| rs2242652 | Codominant    | CC                  | 125 (59.5%)       | 115 (62.8%)       | 135 (67.5%)    | Ref              | -                | Ref           | -                | Ref                     | -                |
|           |               | CT                  | 66 (31.4%)        | 53 (29.0%)        | 59 (29.5%)     | 0.565            | 0.86 (0.52-1.43) | 0.040         | 0.45 (0.21-0.96) | 0.359                   | 1.30 (0.74-2.27) |
|           |               | TT                  | 19 (9.1%)         | 15 (8.2%)         | 6 (3.0%)       | 0.489            | 1.33 (0.60-2.95) | 0.412         | 0.53 (0.11-2.44) | 0.323                   | 1.78 (0.57-5.64) |
|           | Additive      | C                   | 316 (75.2%)       | 283 (77.3%)       | 329 (82.2%)    | Ref              | -                | Ref           | -                | Ref                     | -                |
|           |               | T                   | 104 (24.8%)       | 83 (22.7%)        | 71 (17.8%)     | 0.842            | 1.04 (0.72-1.51) | 0.048         | 0.55 (0.30-0.99) | 0.213                   | 1.33 (0.85-2.08) |
|           | Dominant      | CC                  | 125 (59.5%)       | 115 (62.8%)       | 135 (67.5%)    | Ref              | -                | Ref           | -                | Ref                     | -                |
|           |               | CT+TT               | 85 (40.5%)        | 68 (37.2%)        | 65 (32.5%)     | 0.826            | 0.95 (0.60-1.51) | 0.035         | 0.46 (0.22-0.95) | 0.258                   | 1.36 (0.80-2.32) |
|           | Recessive     | CC+CT               | 191 (90.9%)       | 168 (91.8%)       | 194 (97.0%)    | Ref              | -                | Ref           | -                | Ref                     | -                |
|           |               | TT                  | 19 (9.1%)         | 15 (8.2%)         | 6 (3.0%)       | 0.427            | 1.37 (0.63-2.96) | 0.621         | 0.68 (0.15-3.14) | 0.462                   | 1.56 (0.48-5.12) |
|           | Overdominant  | CC+TT               | 144 (68.6%)       | 130 (71.0%)       | 141 (70.5%)    | Ref              | -                | Ref           | -                | Ref                     | -                |
|           |               | CT                  | 66 (31.4%)        | 53 (29.0%)        | 59 (29.5%)     | 0.467            | 0.83 (0.51-1.36) | 0.049         | 0.46 (0.21-1.00) | 0.413                   | 1.26 (0.72-2.21) |
| rs2853676 | Codominant    | GG                  | 97 (46.2%)        | 77 (42.1%)        | 118 (59.0%)    | Ref              | -                | Ref           | -                | Ref                     | -                |
|           |               | GA                  | 85 (40.5%)        | 75 (41.0%)        | 64 (32.0%)     | 0.361            | 1.26 (0.77-2.05) | 0.018         | 0.41 (0.20-0.86) | 0.009                   | 2.13 (1.20-3.77) |
|           |               | AA                  | 28 (13.3%)        | 31 (16.9%)        | 18 (9.0%)      | 0.431            | 1.31 (0.67-2.57) | 0.199         | 0.51 (0.18-1.43) | 0.001                   | 3.56 (1.64-7.71) |
|           | Additive      | G                   | 279 (66.4%)       | 229 (62.6%)       | 300 (75.0%)    | Ref              | -                | Ref           | -                | Ref                     | -                |
|           |               | A                   | 141 (33.6%)       | 137 (37.4%)       | 100 (25.0%)    | 0.304            | 1.19 (0.85-1.66) | 0.021         | 0.53 (0.31-0.91) | 4.04 × 10 <sup>-5</sup> | 2.31 (1.55-3.45) |
|           | Dominant      | GG                  | 97 (46.2%)        | 77 (42.1%)        | 118 (59.0%)    | Ref              | -                | Ref           | -                | Ref                     | -                |
|           |               | GA+AA               | 113 (53.8%)       | 106 (57.9%)       | 82 (41.0%)     | 0.277            | 1.29 (0.82-2.04) | 0.013         | 0.42 (0.21-0.83) | 0.001                   | 2.51 (1.49-4.24) |
|           | Recessive     | GG+GA               | 182 (86.7%)       | 152 (83.1%)       | 182 (91.0%)    | Ref              | -                | Ref           | -                | Ref                     | -                |
|           |               | AA                  | 28 (13.3%)        | 31 (16.9%)        | 18 (9.0%)      | 0.656            | 1.16 (0.61-2.19) | 0.479         | 0.68 (0.24-1.96) | 0.004                   | 3.19 (1.43-7.08) |
|           | Overdominant  | GG+AA               | 125 (59.5%)       | 108 (59.0%)       | 136 (68.0%)    | Ref              | -                | Ref           | -                | Ref                     | -                |
|           |               | GA                  | 85 (40.5%)        | 75 (41.0%)        | 64 (32.0%)     | 0.435            | 1.20 (0.76-1.91) | 0.031         | 0.45 (0.22-0.93) | 0.099                   | 1.56 (0.92-2.64) |



| SNP       | Genetic Model | Genotype/<br>Allele | HAPE-f<br>(n=210) | HAPE-p<br>(n=183) | HLs<br>(n=200) | HAPE-p vs HAPE-f |                  | HLs vs HAPE-f         |                   | HAPE-p vs HLs           |                  |
|-----------|---------------|---------------------|-------------------|-------------------|----------------|------------------|------------------|-----------------------|-------------------|-------------------------|------------------|
|           |               |                     |                   |                   |                | p value          | OR (95%CI)       | p value               | OR (95%CI)        | p value                 | OR (95%CI)       |
| rs2736098 | Codominant    | AA                  | 57 (27.1%)        | 45 (24.6%)        | 19 (9.5%)      | Ref              | -                | Ref                   | -                 | Ref                     | -                |
|           |               | AG                  | 109 (51.9%)       | 91 (49.7%)        | 81 (40.5%)     | 0.757            | 1.09 (0.63-1.89) | 0.096                 | 2.35 (0.86-6.43)  | 0.062                   | 0.48 (0.22-1.04) |
|           |               | GG                  | 44 (21.0%)        | 47 (25.7%)        | 100 (50.0%)    | 0.218            | 1.49 (0.79-2.81) | $3.30 \times 10^{-4}$ | 6.99 (2.42-20.20) | $2.03 \times 10^{-4}$   | 0.22 (0.10-0.49) |
|           | Additive      | A                   | 223 (53.1%)       | 181 (49.5%)       | 119 (29.8%)    | Ref              | -                | Ref                   | -                 | Ref                     | -                |
|           |               | G                   | 197 (46.9%)       | 185 (50.5%)       | 281 (70.2%)    | 0.192            | 1.24 (0.90-1.70) | $5.62 \times 10^{-5}$ | 2.70 (1.57-4.38)  | $5.013 \times 10^{-05}$ | 0.47 (0.32-0.67) |
|           | Dominant      | AA                  | 57 (27.1%)        | 45 (24.6%)        | 19 (9.5%)      | Ref              | -                | Ref                   | -                 | Ref                     | -                |
|           |               | AG+GG               | 153 (72.9%)       | 138 (75.4%)       | 181 (90.5%)    | 0.454            | 1.22 (0.73-2.05) | 0.007                 | 3.69 (1.43-9.52)  | 0.004                   | 0.35 (0.17-0.71) |
|           | Recessive     | AA+AG               | 166 (79.0%)       | 136 (74.3%)       | 100 (50.0%)    | Ref              | -                | Ref                   | -                 | Ref                     | -                |
|           |               | GG                  | 44 (21.0%)        | 47 (25.7%)        | 100 (50.0%)    | 0.159            | 1.47 (0.86-2.50) | $1.90 \times 10^{-4}$ | 3.89 (1.91-7.95)  | $3.68 \times 10^{-4}$   | 0.38 (0.22-0.65) |
|           | Overdominant  | AA+GG               | 101 (48.1%)       | 92 (50.3%)        | 119 (59.5%)    | Ref              | -                | Ref                   |                   | Ref                     | -                |
| AG        |               | 109 (51.9%)         | 91 (49.7%)        | 81 (40.5%)        | 0.593          | 0.88 (0.56-1.39) | 0.176            | 0.64 (0.33-1.23)      | 0.210             | 1.38 (0.83-2.29)        |                  |
| rs2853669 | Codominant    | CC                  | 67 (31.9%)        | 60 (32.8%)        | 25 (12.5%)     | Ref              | -                | Ref                   | -                 | Ref                     | -                |
|           |               | CT                  | 105 (50.0%)       | 93 (50.8%)        | 81 (40.5%)     | 0.821            | 0.94 (0.57-1.57) | 0.129                 | 2.04 (0.81-5.13)  | 0.064                   | 0.53 (0.27-1.04) |
|           |               | TT                  | 38 (18.1%)        | 30 (16.4%)        | 94 (47.0%)     | 0.875            | 1.05 (0.54-2.05) | $2.97 \times 10^{-4}$ | 5.98 (2.27-15.77) | $1.88 \times 10^{-6}$   | 0.14 (0.06-0.31) |
|           | Additive      | C                   | 239 (56.9%)       | 213 (58.2%)       | 131 (32.8%)    | Ref              | -                | Ref                   | -                 | Ref                     | -                |
|           |               | T                   | 181 (43.1%)       | 153 (41.8%)       | 269 (67.2%)    | 0.945            | 1.01 (0.73-1.40) | $9.67 \times 10^{-5}$ | 2.57 (1.60-4.13)  | $1.48 \times 10^{-7}$   | 0.37 (0.26-0.54) |
|           | Dominant      | CC                  | 67 (31.9%)        | 60 (32.8%)        | 25 (12.5%)     | Ref              | -                | Ref                   | -                 | Ref                     | -                |
|           |               | CT+TT               | 143 (68.1%)       | 123 (67.2%)       | 175 (87.5%)    | 0.909            | 0.97 (0.60-1.57) | 0.010                 | 3.09 (1.31-7.30)  | 0.001                   | 0.33 (0.17-0.63) |
|           | Recessive     | CC+CT               | 172 (81.9%)       | 153 (83.6%)       | 106 (53.0%)    | Ref              | -                | Ref                   | -                 | Ref                     | -                |
|           |               | TT                  | 38 (18.1%)        | 30 (16.4%)        | 94 (47.0%)     | 0.788            | 1.08 (0.60-1.96) | $2.59 \times 10^{-4}$ | 3.93 (1.89-8.19)  | $8.95 \times 10^{-7}$   | 0.23 (0.13-0.42) |
|           | Overdominant  | CC+TT               | 105 (50.0%)       | 90 (49.2%)        | 119 (59.5%)    | Ref              | -                | Ref                   | -                 | Ref                     | -                |
| CT        |               | 105 (50.0%)         | 93 (50.8%)        | 81 (40.5%)        | 0.756          | 0.93 (0.59-1.46) | 0.259            | 0.69 (0.36-1.32)      | 0.082             | 1.57 (0.94-2.61)        |                  |

| SNP       | Genetic Model | Genotype/<br>Allele | HAPE-f<br>(n=210)         | HAPE-p<br>(n=183)         | HLs<br>(n=200)            | HAPE-p vs HAPE-f |                       | HLs vs HAPE-f |                       | HAPE-p vs HLs |                       |
|-----------|---------------|---------------------|---------------------------|---------------------------|---------------------------|------------------|-----------------------|---------------|-----------------------|---------------|-----------------------|
|           |               |                     |                           |                           |                           | p value          | OR (95%CI)            | p value       | OR (95%CI)            | p value       | OR (95%CI)            |
| rs7712562 | Codominant    | GG                  | 170 (81.0%)               | 149 (81.4%)               | 146 (73.0%)               | Ref              | -                     | Ref           | -                     | Ref           | -                     |
|           |               | GA                  | 35 (16.6%)                | 32 (17.5%)                | 45 (22.5%)                | 0.399            | 1.29 (0.71-2.36)      | 0.930         | 0.96 (0.41-2.28)      | 0.489         | 0.80 (0.43-1.50)      |
|           |               | AA                  | 5 (2.4%)                  | 2 (1.1%)                  | 9 (4.5%)                  | 0.437            | 0.47 (0.07-3.15)      | 0.408         | 0.47 (0.08-2.85)      | 0.301         | 0.37 (0.06-2.41)      |
|           | Additive      | G                   | 375 (89.3%)               | 330 (90.2%)               | 337 (84.2%)               | Ref              | -                     | Ref           | -                     | Ref           | -                     |
|           |               | A                   | 45 (10.7%)                | 36 (9.8%)                 | 63 (15.8%)                | 0.810            | 1.07 (0.63-1.79)      | 0.478         | 0.77 (0.37-1.59)      | 0.252         | 0.73 (0.42-1.26)      |
|           | Dominant      | GG                  | 170 (81.0%)               | 149 (81.4%)               | 146 (73.0%)               | Ref              | -                     | Ref           | -                     | Ref           | -                     |
|           |               | GA+AA               | 40 (19.0%)                | 34 (18.6%)                | 54 (27.0%)                | 0.581            | 1.17 (0.66-2.08)      | 0.674         | 0.84 (0.37-1.91)      | 0.352         | 0.75 (0.41-1.38)      |
|           | Recessive     | GG+GA               | 205 (97.6%)               | 181 (98.9%)               | 191 (95.5%)               | Ref              | -                     | Ref           | -                     | Ref           | -                     |
|           |               | AA                  | 5 (2.4%)                  | 2 (1.1%)                  | 9 (4.5%)                  | 0.406            | 0.45 (0.07-2.99)      | 0.373         | 0.43 (0.07-2.72)      | 0.345         | 0.40 (0.06-2.72)      |
|           | Overdominant  | GG+AA<br>GA         | 175 (83.4%)<br>35 (16.6%) | 151 (82.5%)<br>32 (17.5%) | 155 (77.5%)<br>45 (22.5%) | Ref<br>0.385     | -<br>1.30 (0.72-2.35) | Ref<br>0.967  | -<br>0.98 (0.41-2.33) | Ref<br>0.547  | -<br>0.82 (0.44-1.55) |

SPSS 16.0 was used to obtain p values after adjusting with age and gender. Significance was maintained at  $\leq 0.05$  after FDR correction. *TERT*, telomerase reverse transcriptase; HAPE-f, HAPE-free; HAPE-p, HAPE-patients; HLs, Highlanders; n, number of samples; OR, odds ratio; CI, confidence interval; Ref, reference.

[B] Comparison of genotype and allele distribution in HLs with Han Chinese (CHB+CHS) population and Japanese (JPT) population.

| <i>TERT</i> |                     |                         |                     |                |                |                  |                       |                   |
|-------------|---------------------|-------------------------|---------------------|----------------|----------------|------------------|-----------------------|-------------------|
| SNP         | Genotype/<br>Allele | CHB+CHS<br>(Ref, n=204) | JPT<br>(Ref, n=104) | HLs<br>(n=200) | HLs vs CHB+CHS |                  | HLs vs JPT            |                   |
|             |                     |                         |                     |                | p value        | OR (95%CI)       | p value               | OR (95%CI)        |
| rs2736122   | CC                  | 183 (88.0%)             | 74 (71.2%)          | 176 (88.0%)    | Ref            | -                | Ref                   | -                 |
|             | CT                  | 24 (11.5%)              | 30 (28.8%)          | 24 (12.0%)     | 1.000          | 1.04 (0.57-1.90) | $2.66 \times 10^{-4}$ | 0.34 (0.18-0.61)  |
|             | TT                  | 1 (0.5%)                | 0 (0.0%)            | 0 (0.0%)       | *              | -                | *                     | -                 |
|             | C                   | 390 (93.8%)             | 178 (85.6%)         | 376 (94.0%)    | Ref            | -                | Ref                   | -                 |
|             | T                   | 26 (6.3%)               | 30 (14.4%)          | 24 (6.0%)      | 0.882          | 0.96 (0.54-1.70) | 0.001                 | 0.38 (0.22-0.67)  |
| rs2075786   | TT                  | 135 (64.9%)             | 59 (56.7%)          | 124 (62.0%)    | Ref            | -                | Ref                   | -                 |
|             | TC                  | 66 (31.7%)              | 44 (42.3%)          | 64 (32.0%)     | 0.801          | 1.06 (0.69-1.61) | 0.143                 | 0.69 (0.42-1.13)  |
|             | CC                  | 7 (3.4%)                | 1 (1.0%)            | 12 (6.0%)      | 0.198          | 1.87 (0.71-4.89) | 0.115                 | 5.71 (0.73-44.95) |
|             | T                   | 336 (80.8%)             | 162 (77.9%)         | 312 (78.0%)    | Ref            | -                | Ref                   | -                 |
|             | C                   | 80 (19.2%)              | 46 (22.1%)          | 88 (22.0%)     | 0.328          | 1.18 (0.84-1.66) | 1.000                 | 0.99 (0.66-1.49)  |
| rs4246742   | AA                  | 35 (16.8%)              | 13 (12.5%)          | 126 (63.0%)    | Ref            | -                | Ref                   | -                 |
|             | AT                  | 97 (46.6%)              | 46 (44.2%)          | 55 (27.5%)     | <0.000001      | 0.16 (0.10-0.26) | <0.000001             | 0.12 (0.06-0.25)  |
|             | TT                  | 76 (36.5%)              | 45 (43.3%)          | 19 (9.5%)      | <0.000001      | 0.07 (0.04-0.13) | <0.000001             | 0.04 (0.02-0.10)  |
|             | A                   | 167 (40.1%)             | 72 (34.6%)          | 307 (76.8%)    | Ref            | -                | Ref                   | -                 |
|             | T                   | 249 (59.9%)             | 136 (65.4%)         | 93 (23.3%)     | <0.000001      | 0.20 (0.15-0.28) | <0.000001             | 0.16 (0.11-0.23)  |
| rs10069690  | CC                  | 149 (71.6%)             | 63 (60.6%)          | 132 (66.0%)    | Ref            | -                | Ref                   | -                 |
|             | CT                  | 55 (26.4%)              | 36 (34.6%)          | 60 (30.0%)     | 0.347          | 1.23 (0.80-1.90) | 0.379                 | 0.80 (0.48-1.33)  |
|             | TT                  | 4 (1.9%)                | 5 (4.8%)            | 8 (4.0%)       | 0.241          | 2.26 (0.67-7.67) | 0.761                 | 0.76 (0.24-2.43)  |
|             | C                   | 353 (84.9%)             | 162 (77.9%)         | 324 (81.0%)    | Ref            | -                | Ref                   | -                 |
|             | T                   | 63 (15.1%)              | 46 (22.1%)          | 76 (19.0%)     | 0.143          | 1.31 (0.91-1.90) | 0.363                 | 0.83 (0.55-1.25)  |

| SNP       | Genotype/<br>Allele | CHB+CHS<br>(Ref, n=204) | JPT<br>(Ref, n=104) | HLs<br>(n=200) | HLs vs CHB+CHS        |                  | HLs vs JPT |                  |
|-----------|---------------------|-------------------------|---------------------|----------------|-----------------------|------------------|------------|------------------|
|           |                     |                         |                     |                | p value               | OR (95%CI)       | p value    | OR (95%CI)       |
| rs2242652 | CC                  | 149 (71.6%)             | 62 (59.6%)          | 135 (67.5%)    | Ref                   | -                | Ref        | -                |
|           | CT                  | 55 (26.4%)              | 37 (35.6%)          | 59 (29.5%)     | 0.446                 | 1.18 (0.77-1.83) | 0.230      | 0.73 (0.44-1.22) |
|           | TT                  | 4 (1.9%)                | 5 (4.8%)            | 6 (3.0%)       | 0.528                 | 1.66 (0.46-5.99) | 0.337      | 0.55 (0.16-1.88) |
|           | C                   | 353 (84.9%)             | 161 (77.4%)         | 329 (82.3%)    | Ref                   | -                | Ref        | -                |
|           | T                   | 63 (15.1%)              | 47 (22.6%)          | 71 (17.8%)     | 0.315                 | 1.21 (0.83-1.75) | 0.152      | 0.74 (0.49-1.12) |
| rs2853676 | GG                  | 160 (76.9%)             | 73 (70.2%)          | 118 (59.0%)    | Ref                   | -                | Ref        | -                |
|           | GA                  | 41 (19.7%)              | 24 (23.1%)          | 64 (32.0%)     | 0.001                 | 2.12 (1.34-3.35) | 0.074      | 1.65 (0.95-2.87) |
|           | AA                  | 7 (3.4%)                | 7 (6.7%)            | 18 (9.0%)      | 0.004                 | 3.49 (1.41-8.62) | 0.320      | 1.59 (0.63-3.99) |
|           | G                   | 361 (86.8%)             | 170 (81.7%)         | 300 (75.0%)    | Ref                   | -                | Ref        | -                |
|           | A                   | 55 (13.2%)              | 38 (18.3%)          | 100 (25.0%)    | $1.80 \times 10^{-5}$ | 2.19 (1.52-3.15) | 0.060      | 1.49 (0.98-2.27) |
| rs2736098 | AA                  | 24 (11.5%)              | 8 (7.7%)            | 19 (9.5%)      | Ref                   | -                | Ref        | -                |
|           | GA                  | 106 (51.0%)             | 35 (33.7%)          | 81 (40.5%)     | 1.000                 | 0.97 (0.50-1.88) | 1.000      | 0.97 (0.39-2.44) |
|           | GG                  | 78 (37.5%)              | 61 (58.7%)          | 100 (50.0%)    | 0.157                 | 1.62 (0.83-3.17) | 0.410      | 0.69 (0.29-1.67) |
|           | A                   | 154 (37.0%)             | 51 (24.5%)          | 119 (29.8%)    | Ref                   | -                | Ref        | -                |
|           | G                   | 262 (63.0%)             | 157 (75.5%)         | 281 (70.3%)    | 0.028                 | 1.39 (1.04-1.86) | 0.173      | 0.77 (0.52-1.12) |
| rs2853669 | CC                  | 24 (11.5%)              | 8 (7.7%)            | 25 (12.5%)     | Ref                   | -                | Ref        | -                |
|           | CT                  | 107 (51.4%)             | 35 (33.7%)          | 81 (40.5%)     | 0.320                 | 0.73 (0.39-1.37) | 0.507      | 0.74 (0.30-1.80) |
|           | TT                  | 77 (37.0%)              | 61 (58.7%)          | 94 (47.0%)     | 0.625                 | 1.17 (0.62-2.21) | 0.102      | 0.49 (0.21-1.16) |
|           | C                   | 155 (37.3%)             | 51 (24.5%)          | 131 (32.8%)    | Ref                   | -                | Ref        | -                |
|           | T                   | 261 (62.7%)             | 157 (75.5%)         | 269 (67.3%)    | 0.177                 | 1.22 (0.91-1.63) | 0.036      | 0.67 (0.46-0.97) |

| SNP       | Genotype/<br>Allele | CHB+CHS<br>(Ref, n=204) | JPT<br>(Ref, n=104) | HLs<br>(n=200) | HLs vs CHB+CHS |                    | HLs vs JPT |                   |
|-----------|---------------------|-------------------------|---------------------|----------------|----------------|--------------------|------------|-------------------|
|           |                     |                         |                     |                | p value        | OR (95%CI)         | p value    | OR (95%CI)        |
| rs7712562 | GG                  | 175 (84.1%)             | 87 (83.7%)          | 146 (73.0%)    | Ref            | -                  | Ref        | -                 |
|           | GA                  | 32 (15.4%)              | 15 (14.4%)          | 45 (22.5%)     | 0.041          | 1.69 (1.02-2.79)   | 0.074      | 1.79 (0.94-3.40)  |
|           | AA                  | 1 (0.5%)                | 2 (1.9%)            | 9 (4.5%)       | 0.007          | 10.79 (1.35-86.15) | 0.337      | 2.68 (0.57-12.70) |
|           | G                   | 382 (91.8%)             | 189 (90.9%)         | 337 (84.3%)    | Ref            | -                  | Ref        | -                 |
|           | A                   | 34 (8.2%)               | 19 (9.1%)           | 63 (15.8%)     | 0.001          | 2.10 (1.35-3.27)   | 0.023      | 1.86 (1.08-3.20)  |

SISA online tool was used to obtain p values. Significance was maintained at  $\leq 0.05$  after FDR correction. \*Analysis could not be performed because the representatives of an allele were absent in a study group. *TERT*, telomerase reverse transcriptase; CHB+CHS, Han Chinese population comprising of Han Chinese in Beijing (CHB) and Southern Han Chinese (CHS); JPT, Japanese population; HLs, highlanders; Ref, reference; n, number of samples; OR, odds ratio; CI, confidence interval.

Supplementary Table S10: Genotype and allele distribution of *TERC* SNP

[A] Comparison of genotype and allele distribution among HAPE-f, HAPE-p and HLs.

| <i>TERC</i> |               |                     |                   |                   |                |                  |                  |                        |                    |                        |                  |
|-------------|---------------|---------------------|-------------------|-------------------|----------------|------------------|------------------|------------------------|--------------------|------------------------|------------------|
| SNP         | Genetic Model | Genotype/<br>Allele | HAPE-f<br>(n=210) | HAPE-p<br>(n=183) | HLs<br>(n=200) | HAPE-p vs HAPE-f |                  | HLs vs HAPE-f          |                    | HAPE-p vs HLs          |                  |
|             |               |                     |                   |                   |                | p value          | OR (95%CI)       | p value                | OR (95%CI)         | p value                | OR (95%CI)       |
| rs2293607   | Codominant    | AA                  | 132 (62.8%)       | 97 (53.0%)        | 32 (16.0%)     | Ref              | -                | Ref                    | -                  | Ref                    | -                |
|             |               | AG                  | 65 (31.0%)        | 66 (36.1%)        | 101 (50.5%)    | 0.099            | 1.51 (0.93-2.47) | $1.30 \times 10^{-6}$  | 9.04 (3.71-22.04)  | $3.16 \times 10^{-7}$  | 0.18 (0.10-0.35) |
|             |               | GG                  | 13 (6.2%)         | 20 (10.9%)        | 67 (33.5%)     | 0.015            | 2.81 (1.22-6.46) | $8.04 \times 10^{-9}$  | 26.92 (8.79-82.43) | $2.42 \times 10^{-9}$  | 0.09 (0.04-0.19) |
|             | Additive      | A                   | 329 (78.3%)       | 260 (71.0%)       | 165 (41.2%)    | Ref              | -                | Ref                    | -                  | Ref                    | -                |
|             |               | G                   | 91 (21.7%)        | 106 (29.0%)       | 235 (58.8%)    | 0.005            | 1.70 (1.18-2.45) | $5.12 \times 10^{-12}$ | 6.04 (3.62-10.06)  | $6.81 \times 10^{-12}$ | 0.27 (0.18-0.39) |
|             | Dominant      | AA                  | 132 (62.8%)       | 97 (53.0%)        | 32 (16.0%)     | Ref              | -                | Ref                    | -                  | Ref                    | -                |
|             |               | AG+GG               | 78 (37.2%)        | 86 (47.0%)        | 168 (84.0%)    | 0.020            | 1.73 (1.09-2.74) | $5.97 \times 10^{-9}$  | 12.81 (5.43-30.26) | $6.13 \times 10^{-10}$ | 0.14 (0.08-0.26) |
|             | Recessive     | AA+AG               | 197 (93.8%)       | 163 (89.1%)       | 133 (66.5%)    | Ref              | -                | Ref                    | -                  | Ref                    | -                |
|             |               | GG                  | 13 (6.2%)         | 20 (10.9%)        | 67 (33.5%)     | 0.030            | 2.46 (1.09-5.54) | $2.40 \times 10^{-6}$  | 9.95 (3.83-25.84)  | $1.47 \times 10^{-5}$  | 0.23 (0.12-0.45) |
|             | Overdominant  | AA+GG               | 145 (69.0%)       | 117 (63.9%)       | 99 (49.5%)     | Ref              | -                | Ref                    | -                  | Ref                    | -                |
|             |               | AG                  | 65 (31.0%)        | 66 (36.1%)        | 101 (50.5%)    | 0.259            | 1.31 (0.82-2.12) | 0.006                  | 2.53 (1.30-4.93)   | 0.011                  | 0.51 (0.31-0.86) |

SPSS 16.0 was used to obtain p values after adjusting with age and gender. Significance was maintained at  $\leq 0.05$  after FDR correction. *TERC*, telomerase RNA component; HAPE-f, HAPE-free; HAPE-p, HAPE-patients; HLs, Highlanders; n, number of samples; OR, odds ratio; CI, confidence interval; Ref, reference.

[B] Comparison of genotype and allele distribution in HLs with Han Chinese (CHB+CHS) population and Japanese (JPT) population.

| <i>TERC</i> |                     |                         |                     |                |                |                  |            |                  |
|-------------|---------------------|-------------------------|---------------------|----------------|----------------|------------------|------------|------------------|
| SNP         | Genotype/<br>Allele | CHB+CHS<br>(Ref, n=204) | JPT<br>(Ref, n=104) | HLs<br>(n=200) | HLs vs CHB+CHS |                  | HLs vs JPT |                  |
|             |                     |                         |                     |                | p value        | OR (95%CI)       | p value    | OR (95%CI)       |
| rs2293607   | AA                  | 40 (19.2%)              | 9 (8.7%)            | 32 (16.0%)     | Ref            | -                | Ref        | -                |
|             | AG                  | 105 (50.5%)             | 53 (51.0%)          | 101 (50.5%)    | 0.503          | 1.20 (0.70-2.06) | 0.128      | 0.54 (0.24-1.21) |
|             | GG                  | 63 (30.3%)              | 42 (40.4%)          | 67 (33.5%)     | 0.334          | 1.33 (0.75-2.37) | 0.056      | 0.45 (0.20-1.03) |
|             | A                   | 185 (44.5%)             | 71 (34.1%)          | 165 (41.3%)    | Ref            | -                | Ref        | -                |
|             | G                   | 231 (55.5%)             | 137 (65.9%)         | 235 (58.8%)    | 0.353          | 1.14 (0.86-1.51) | 0.088      | 0.74 (0.52-1.05) |

SISA online tool was used to obtain p values. Significance was maintained at  $\leq 0.05$  after FDR correction. *TERC*, telomerase RNA component; CHB+CHS, Han Chinese population comprising of Han Chinese in Beijing (CHB) and Southern Han Chinese (CHS); JPT, Japanese population; HLs, highlanders; Ref, reference; n, number of samples; OR, odds ratio; CI, confidence interval.

Supplementary Table S11: Genotype and allele distribution of 9 SNPs of *TEPI*

[A] Comparison of genotype and allele distribution among HAPE-f, HAPE-p and HLs.

| <i>TEPI</i> |               |                     |                   |                   |                |                  |                  |               |                  |                       |                    |
|-------------|---------------|---------------------|-------------------|-------------------|----------------|------------------|------------------|---------------|------------------|-----------------------|--------------------|
| SNP         | Genetic Model | Genotype/<br>Allele | HAPE-f<br>(n=210) | HAPE-p<br>(n=183) | HLs<br>(n=200) | HAPE-p vs HAPE-f |                  | HLs vs HAPE-f |                  | HAPE-p vs HLs         |                    |
|             |               |                     |                   |                   |                | p value          | OR (95%CI)       | p value       | OR (95%CI)       | p value               | OR (95%CI)         |
| rs2104978   | Codominant    | AA                  | 182 (86.7%)       | 138 (75.4%)       | 192 (96.0%)    | Ref              | -                | Ref           | -                | Ref                   | -                  |
|             |               | AG                  | 23 (11.0%)        | 39 (21.3%)        | 3 (1.5%)       | 0.045            | 1.90 (1.02-3.56) | 0.003         | 0.05 (0.01-0.36) | $1.83 \times 10^{-5}$ | 18.91 (4.93-72.56) |
|             |               | GG                  | 5 (2.3%)          | 6 (3.3%)          | 5 (2.5%)       | 0.628            | 0.69 (0.15-3.14) | 0.698         | 0.65 (0.07-5.77) | 0.731                 | 1.30 (0.29-5.71)   |
|             | Additive      | A                   | 387 (92.1%)       | 315 (86.1%)       | 387 (96.8%)    | Ref              | -                | Ref           | -                | Ref                   | -                  |
|             |               | G                   | 33 (7.9%)         | 51 (13.9%)        | 13 (3.2%)      | 0.176            | 1.44 (0.85-2.42) | 0.009         | 0.24 (0.08-0.70) | $1.44 \times 10^{-4}$ | 4.31 (2.03-9.16)   |
|             | Dominant      | AA                  | 182 (86.7%)       | 138 (75.4%)       | 192 (96.0%)    | Ref              | -                | Ref           | -                | Ref                   | -                  |
|             |               | AG+GG               | 28 (13.3%)        | 45 (24.6%)        | 8 (4.0%)       | 0.081            | 1.68 (0.94-3.01) | 0.005         | 0.15 (0.04-0.57) | $2.66 \times 10^{-5}$ | 7.29 (2.88-18.40)  |
|             | Recessive     | AA+AG               | 205 (97.6%)       | 177 (96.7%)       | 195 (97.5%)    | Ref              | -                | Ref           | -                | Ref                   | -                  |
|             |               | GG                  | 5 (2.4%)          | 6 (3.3%)          | 5 (2.5%)       | 0.541            | 0.63 (0.14-2.81) | 0.816         | 0.78 (0.09-6.43) | 0.968                 | 1.03 (0.24-4.50)   |
|             | Overdominant  | AA+GG               | 187 (89.0%)       | 144 (78.7%)       | 197 (98.5%)    | Ref              | -                | Ref           | -                | Ref                   | -                  |
|             |               | AG                  | 23 (11.0%)        | 39 (21.3%)        | 3 (1.5%)       | 0.037            | 1.93 (1.04-3.59) | 0.003         | 0.06 (0.01-0.40) | $1.93 \times 10^{-5}$ | 18.30 (4.82-69.42) |
| rs1713449   | Codominant    | CC                  | 108 (51.4%)       | 109 (59.6%)       | 99 (49.5%)     | Ref              | -                | Ref           | -                | Ref                   | -                  |
|             |               | CT                  | 78 (37.1%)        | 54 (29.5%)        | 69 (34.5%)     | 0.212            | 0.73 (0.44-1.20) | 0.287         | 0.67 (0.33-1.39) | 0.096                 | 0.62 (0.35-1.09)   |
|             |               | TT                  | 24 (11.5%)        | 20 (10.9%)        | 32 (16.0%)     | 0.442            | 0.74 (0.34-1.60) | 0.997         | 1.00 (0.37-2.72) | 0.176                 | 0.60 (0.28-1.26)   |
|             | Additive      | C                   | 294 (70.0%)       | 272 (74.3%)       | 267 (66.8%)    | Ref              | -                | Ref           | -                | Ref                   | -                  |
|             |               | T                   | 126 (30.0%)       | 94 (25.7%)        | 133 (33.2%)    | 0.211            | 0.80 (0.56-1.14) | 0.667         | 0.90 (0.55-1.47) | 0.045                 | 0.67 (0.45-0.99)   |
|             | Dominant      | CC                  | 108 (51.4%)       | 109 (59.6%)       | 99 (49.5%)     | Ref              | -                | Ref           | -                | Ref                   | -                  |
|             |               | CT+TT               | 102 (48.6%)       | 74 (40.4%)        | 101 (50.5%)    | 0.186            | 0.74 (0.47-1.16) | 0.417         | 0.76 (0.40-1.47) | 0.056                 | 0.61 (0.37-1.01)   |
|             | Recessive     | CC+CT               | 186 (88.5%)       | 163 (89.1%)       | 168 (84.0%)    | Ref              | -                | Ref           | -                | Ref                   | -                  |
|             |               | TT                  | 24 (11.5%)        | 20 (10.9%)        | 32 (16.0%)     | 0.662            | 0.85 (0.41-1.75) | 0.723         | 1.18 (0.46-3.02) | 0.323                 | 0.69 (0.33-1.44)   |
|             | Overdominant  | CC+TT               | 132 (62.9%)       | 129 (70.5%)       | 131 (65.5%)    | Ref              | -                | Ref           | -                | Ref                   | -                  |
|             |               | CT                  | 78 (37.1%)        | 54 (29.5%)        | 69 (34.5%)     | 0.271            | 0.76 (0.47-1.23) | 0.274         | 0.68 (0.34-1.35) | 0.186                 | 0.69 (0.40-1.19)   |



| SNP       | Genetic Model | Genotype/<br>Allele | HAPE-f<br>(n=210) | HAPE-p<br>(n=183) | HLs<br>(n=200) | HAPE-p vs HAPE-f |                  | HLs vs HAPE-f |                   | HAPE-p vs HLs         |                   |
|-----------|---------------|---------------------|-------------------|-------------------|----------------|------------------|------------------|---------------|-------------------|-----------------------|-------------------|
|           |               |                     |                   |                   |                | p value          | OR (95%CI)       | p value       | OR (95%CI)        | p value               | OR (95%CI)        |
| rs2228041 | Codominant    | GG                  | 181 (86.2%)       | 145 (79.2%)       | 192 (96.0%)    | Ref              | -                | Ref           | -                 | Ref                   | -                 |
|           |               | GA                  | 25 (11.9%)        | 33 (18.0%)        | 6 (3.0%)       | 0.319            | 1.38 (0.73-2.60) | 0.002         | 0.08 (0.02-0.39)  | 0.001                 | 6.41 (2.24-18.32) |
|           |               | AA                  | 4 (1.9%)          | 5 (2.7%)          | 2 (1.0%)       | 0.326            | 2.09 (0.48-9.17) | 0.198         | 3.78 (0.50-28.66) | 0.744                 | 0.75 (0.14-4.12)  |
|           | Additive      | G                   | 387 (92.1%)       | 323 (88.3%)       | 390 (97.5%)    | Ref              | -                | Ref           | -                 | Ref                   | -                 |
|           |               | A                   | 33 (7.9%)         | 43 (11.7%)        | 10 (2.5%)      | 0.150            | 1.48 (0.87-2.51) | 0.096         | 0.40 (0.13-1.18)  | 0.008                 | 3.06 (1.34-6.98)  |
|           | Dominant      | GG                  | 181 (86.2%)       | 145 (79.2%)       | 192 (96.0%)    | Ref              | -                | Ref           | -                 | Ref                   | -                 |
|           |               | GA+AA               | 29 (13.8%)        | 38 (20.8%)        | 8 (4.0%)       | 0.213            | 1.46 (0.81-2.64) | 0.017         | 0.21 (0.06-0.76)  | 0.002                 | 4.39 (1.73-11.12) |
|           | Recessive     | GG+GA               | 206 (98.1%)       | 178 (97.3%)       | 198 (99.0%)    | Ref              | -                | Ref           | -                 | Ref                   | -                 |
|           |               | AA                  | 4 (1.9%)          | 5 (2.7%)          | 2 (1.0%)       | 0.376            | 1.92 (0.45-8.16) | 0.175         | 3.93 (0.54-28.37) | 0.588                 | 0.63 (0.11-3.41)  |
|           | Overdominant  | GG+AA               | 185 (88.1%)       | 150 (82.0%)       | 194 (97.0%)    | Ref              | -                | Ref           | -                 | Ref                   | -                 |
|           |               | GA                  | 25 (11.9%)        | 33 (18.0%)        | 6 (3.0%)       | 0.347            | 1.35 (0.72-2.54) | 0.002         | 0.09 (0.02-0.40)  | $4.81 \times 10^{-4}$ | 6.46 (2.27-18.40) |
| rs2228036 | Codominant    | GG                  | 134 (63.8%)       | 95 (52.0%)        | 127 (63.5%)    | Ref              | -                | Ref           | -                 | Ref                   | -                 |
|           |               | GT                  | 69 (32.9%)        | 72 (39.3%)        | 57 (28.5%)     | 0.581            | 1.15 (0.70-1.87) | 0.267         | 0.67 (0.32-1.37)  | 0.040                 | 1.77 (1.03-3.04)  |
|           |               | TT                  | 7 (3.3%)          | 16 (8.7%)         | 16 (8.0%)      | 0.042            | 2.84 (1.04-7.77) | 0.806         | 1.21 (0.26-5.65)  | 0.406                 | 1.48 (0.59-3.73)  |
|           | Additive      | G                   | 337 (80.2%)       | 262 (71.6%)       | 311 (77.8%)    | Ref              | -                | Ref           | -                 | Ref                   | -                 |
|           |               | T                   | 83 (19.8%)        | 104 (28.4%)       | 89 (22.2%)     | 0.087            | 1.38 (0.95-2.01) | 0.447         | 0.80 (0.45-1.42)  | 0.053                 | 1.50 (0.99-2.27)  |
|           | Dominant      | GG                  | 134 (63.8%)       | 95 (52.0%)        | 127 (63.5%)    | Ref              | -                | Ref           | -                 | Ref                   | -                 |
|           |               | GT+TT               | 76 (36.2%)        | 88 (48.0%)        | 73 (36.5%)     | 0.266            | 1.30 (0.82-2.06) | 0.321         | 0.71 (0.36-1.40)  | 0.034                 | 1.74 (1.04-2.92)  |
|           | Recessive     | GG+GT               | 203 (96.7%)       | 167 (91.3%)       | 184 (92.0%)    | Ref              | -                | Ref           | -                 | Ref                   | -                 |
|           |               | TT                  | 7 (3.3%)          | 16 (8.7%)         | 16 (8.0%)      | 0.047            | 2.73 (1.01-7.34) | 0.831         | 1.19 (0.24-5.86)  | 0.600                 | 1.28 (0.51-3.20)  |
|           | Overdominant  | GG+TT               | 141 (67.1%)       | 111 (60.7%)       | 143 (71.5%)    | Ref              | -                | Ref           | -                 | Ref                   | -                 |
|           |               | GT                  | 69 (32.9%)        | 72 (39.3%)        | 57 (28.5%)     | 0.916            | 1.03 (0.64-1.65) | 0.268         | 0.67 (0.33-1.36)  | 0.057                 | 1.68 (0.98-2.87)  |

| SNP       | Genetic Model | Genotype/<br>Allele | HAPE-f<br>(n=210) | HAPE-p<br>(n=183) | HLs<br>(n=200) | HAPE-p vs HAPE-f |                  | HLs vs HAPE-f |                  | HAPE-p vs HLs |                  |
|-----------|---------------|---------------------|-------------------|-------------------|----------------|------------------|------------------|---------------|------------------|---------------|------------------|
|           |               |                     |                   |                   |                | p value          | OR (95%CI)       | p value       | OR (95%CI)       | p value       | OR (95%CI)       |
| rs1760898 | Codominant    | CC                  | 85 (40.5%)        | 81 (44.3%)        | 90 (45.0%)     | Ref              | -                | Ref           | -                | Ref           | -                |
|           |               | CA                  | 88 (41.9%)        | 77 (42.0%)        | 88 (44.0%)     | 0.859            | 0.96 (0.58-1.58) | 0.336         | 0.68 (0.32-1.48) | 0.617         | 1.15 (0.66-1.99) |
|           |               | AA                  | 37 (17.6%)        | 25 (13.7%)        | 22 (11.0%)     | 0.176            | 0.63 (0.33-1.23) | 0.297         | 0.61 (0.24-1.55) | 0.920         | 1.04 (0.48-2.26) |
|           | Additive      | C                   | 258 (61.4%)       | 239 (65.3%)       | 268 (67.0%)    | Ref              | -                | Ref           | -                | Ref           | -                |
|           |               | A                   | 162 (38.6%)       | 127 (34.7%)       | 132 (33.0%)    | 0.201            | 0.81 (0.58-1.12) | 0.196         | 0.73 (0.45-1.18) | 0.819         | 1.04 (0.72-1.52) |
|           | Dominant      | CC                  | 85 (40.5%)        | 81 (44.3%)        | 90 (45.0%)     | Ref              | -                | Ref           | -                | Ref           | -                |
|           |               | CA+AA               | 125 (59.5%)       | 102 (55.7%)       | 110 (55.0%)    | 0.473            | 0.85 (0.54-1.33) | 0.237         | 0.67 (0.35-1.30) | 0.696         | 1.11 (0.67-1.83) |
|           | Recessive     | CC+CA               | 173 (82.4%)       | 158 (86.3%)       | 178 (89.0%)    | Ref              | -                | Ref           | -                | Ref           | -                |
|           |               | AA                  | 37 (17.6%)        | 25 (13.7%)        | 22 (11.0%)     | 0.161            | 0.64 (0.34-1.20) | 0.434         | 0.70 (0.28-1.72) | 0.899         | 0.95 (0.44-2.06) |
|           | Overdominant  | CC+AA               | 122 (58.1%)       | 106 (58.0%)       | 112 (56.0%)    | Ref              | -                | Ref           | -                | Ref           | -                |
|           |               | CA                  | 88 (41.9%)        | 77 (42.0%)        | 88 (44.0%)     | 0.741            | 1.08 (0.68-1.71) | 0.537         | 0.81 (0.41-1.60) | 0.634         | 1.13 (0.68-1.88) |
| rs1760897 | Codominant    | TT                  | 92 (43.8%)        | 70 (38.3%)        | 73 (36.5%)     | Ref              | -                | Ref           | -                | Ref           | -                |
|           |               | TC                  | 81 (38.6%)        | 80 (43.7%)        | 90 (45.0%)     | 0.481            | 1.20 (0.73-1.97) | 0.640         | 1.18 (0.58-2.41) | 0.991         | 1.00 (0.58-1.75) |
|           |               | CC                  | 37 (17.6%)        | 33 (18.0%)        | 37 (18.5%)     | 0.399            | 1.31 (0.70-2.47) | 0.508         | 1.36 (0.55-3.35) | 0.627         | 0.85 (0.43-1.67) |
|           | Additive      | T                   | 265 (63.1%)       | 220 (60.1%)       | 236 (59.0%)    | Ref              | -                | Ref           | -                | Ref           | -                |
|           |               | C                   | 155 (36.9%)       | 146 (39.9%)       | 164 (41.0%)    | 0.366            | 1.16 (0.84-1.62) | 0.455         | 1.20 (0.75-1.91) | 0.602         | 0.91 (0.63-1.30) |
|           | Dominant      | TT                  | 92 (43.8%)        | 70 (38.3%)        | 73 (36.5%)     | Ref              | -                | Ref           | -                | Ref           | -                |
|           |               | TC+CC               | 118 (56.2%)       | 113 (61.7%)       | 127 (63.5%)    | 0.410            | 1.21 (0.76-1.93) | 0.503         | 1.26 (0.65-2.44) | 0.822         | 0.94 (0.56-1.58) |
|           | Recessive     | TT+TC               | 173 (82.4%)       | 150 (82.0%)       | 163 (81.5%)    | Ref              | -                | Ref           | -                | Ref           | -                |
|           |               | CC                  | 37 (17.6%)        | 33 (18.0%)        | 37 (18.5%)     | 0.564            | 1.19 (0.66-2.15) | 0.632         | 1.22 (0.53-2.81) | 0.515         | 0.81 (0.43-1.53) |
|           | Overdominant  | TT+CC               | 129 (61.4%)       | 103 (56.3%)       | 110 (55.0%)    | Ref              | -                | Ref           | -                | Ref           | -                |
|           |               | TC                  | 81 (38.6%)        | 80 (43.7%)        | 90 (45.0%)     | 0.708            | 1.09 (0.69-1.73) | 0.769         | 1.10 (0.57-2.15) | 0.769         | 1.08 (0.65-1.79) |

| SNP       | Genetic Model | Genotype/<br>Allele | HAPE-f<br>(n=210) | HAPE-p<br>(n=183) | HLs<br>(n=200) | HAPE-p vs HAPE-f |                  | HLs vs HAPE-f         |                   | HAPE-p vs HLs         |                   |
|-----------|---------------|---------------------|-------------------|-------------------|----------------|------------------|------------------|-----------------------|-------------------|-----------------------|-------------------|
|           |               |                     |                   |                   |                | p value          | OR (95%CI)       | p value               | OR (95%CI)        | p value               | OR (95%CI)        |
| rs2184282 | Codominant    | AA                  | 138 (65.7%)       | 134 (73.2%)       | 97 (48.5%)     | Ref              | -                | Ref                   | -                 | Ref                   | -                 |
|           |               | AG                  | 58 (27.6%)        | 41 (22.4%)        | 69 (34.5%)     | 0.108            | 0.64 (0.37-1.10) | 0.015                 | 2.43 (1.18-4.97)  | 0.002                 | 0.39 (0.22-0.70)  |
|           |               | GG                  | 14 (6.7%)         | 8 (4.4%)          | 34 (17.0%)     | 0.550            | 0.74 (0.27-2.01) | 0.004                 | 4.60 (1.63-12.95) | $2.38 \times 10^{-5}$ | 0.11 (0.04-0.31)  |
|           | Additive      | A                   | 334 (79.5%)       | 309 (84.4%)       | 263 (65.8%)    | Ref              | -                | Ref                   | -                 | Ref                   | -                 |
|           |               | G                   | 86 (20.5%)        | 57 (15.6%)        | 137 (34.2%)    | 0.128            | 0.72 (0.47-1.10) | $2.95 \times 10^{-4}$ | 2.52 (1.53-4.16)  | $7.81 \times 10^{-8}$ | 0.31 (0.20-0.47)  |
|           | Dominant      | AA                  | 138 (65.7%)       | 134 (73.2%)       | 97 (48.5%)     | Ref              | -                | Ref                   | -                 | Ref                   | -                 |
|           |               | AG+GG               | 72 (34.3%)        | 49 (26.8%)        | 103 (51.5%)    | 0.105            | 0.66 (0.40-1.09) | 0.002                 | 2.92 (1.49-5.73)  | $1.10 \times 10^{-5}$ | 0.30 (0.17-0.51)  |
|           | Recessive     | AA+AG               | 196 (93.3%)       | 175 (95.6%)       | 166 (83.0%)    | Ref              | -                | Ref                   | -                 | Ref                   | -                 |
|           |               | GG                  | 14 (6.7%)         | 8 (4.4%)          | 34 (17.0%)     | 0.723            | 0.84 (0.31-2.23) | 0.021                 | 3.12 (1.19-8.19)  | $3.29 \times 10^{-4}$ | 0.18 (0.07-0.46)  |
|           | Overdominant  | AA+GG               | 152 (72.4%)       | 142 (77.6%)       | 131 (65.5%)    | Ref              | -                | Ref                   | -                 | Ref                   | -                 |
|           |               | AG                  | 58 (27.6%)        | 41 (22.4%)        | 69 (34.5%)     | 0.124            | 0.66 (0.39-1.12) | 0.086                 | 1.82 (0.92-3.61)  | 0.023                 | 0.52 (0.30-0.91)  |
| rs4246977 | Codominant    | TT                  | 57 (27.1%)        | 45 (24.6%)        | 127 (63.5%)    | Ref              | -                | Ref                   | -                 | Ref                   | -                 |
|           |               | TC                  | 105 (50.0%)       | 99 (54.1%)        | 60 (30.0%)     | 0.493            | 1.21 (0.70-2.11) | $2.88 \times 10^{-4}$ | 0.22 (0.10-0.50)  | $8.99 \times 10^{-7}$ | 4.20 (2.37-7.44)  |
|           |               | CC                  | 48 (22.9%)        | 39 (21.3%)        | 13 (6.5%)      | 0.525            | 0.81 (0.42-1.56) | $4.58 \times 10^{-5}$ | 0.09 (0.03-0.28)  | $8.50 \times 10^{-6}$ | 6.76 (2.92-15.69) |
|           | Additive      | T                   | 219 (52.1%)       | 189 (51.6%)       | 314 (78.5%)    | Ref              | -                | Ref                   | -                 | Ref                   | -                 |
|           |               | C                   | 201 (47.9%)       | 177 (48.4%)       | 86 (21.5%)     | 0.538            | 0.90 (0.66-1.25) | $2.68 \times 10^{-7}$ | 0.25 (0.15-0.42)  | $1.35 \times 10^{-8}$ | 3.08 (2.09-4.54)  |
|           | Dominant      | TT                  | 57 (27.1%)        | 45 (24.6%)        | 127 (63.5%)    | Ref              | -                | Ref                   | -                 | Ref                   | -                 |
|           |               | TC+CC               | 153 (72.9%)       | 138 (75.4%)       | 73 (36.5%)     | 0.807            | 1.07 (0.64-1.79) | $4.59 \times 10^{-6}$ | 0.19 (0.09-0.39)  | $1.58 \times 10^{-8}$ | 4.76 (2.77-8.19)  |
|           | Recessive     | TT+TC               | 162 (77.1%)       | 144 (78.7%)       | 187 (93.5%)    | Ref              | -                | Ref                   | -                 | Ref                   | -                 |
|           |               | CC                  | 48 (22.9%)        | 39 (21.3%)        | 13 (6.5%)      | 0.189            | 0.69 (0.39-1.20) | 0.001                 | 0.15 (0.05-0.45)  | 0.003                 | 3.36 (1.50-7.51)  |
|           | Overdominant  | TT+CC               | 105 (50.0%)       | 84 (45.9%)        | 140 (70.0%)    | Ref              | -                | Ref                   | -                 | Ref                   | -                 |
|           |               | TC                  | 105 (50.0%)       | 99 (54.1%)        | 60 (30.0%)     | 0.195            | 1.35 (0.86-2.12) | 0.030                 | 0.47 (0.24-0.93)  | $3.26 \times 10^{-4}$ | 2.62 (1.55-4.44)  |

| SNP        | Genetic Model | Genotype/ Allele | HAPE-f (n=210) | HAPE-p (n=183) | HLs (n=200) | HAPE-p vs HAPE-f |                  | HLs vs HAPE-f         |                   | HAPE-p vs HLs         |                  |
|------------|---------------|------------------|----------------|----------------|-------------|------------------|------------------|-----------------------|-------------------|-----------------------|------------------|
|            |               |                  |                |                |             | p value          | OR (95%CI)       | p value               | OR (95%CI)        | p value               | OR (95%CI)       |
| rs75932631 | Codominant    | TT               | 162 (77.1%)    | 146 (79.8%)    | 113 (56.5%) | Ref              | -                | Ref                   | -                 | Ref                   | -                |
|            |               | TC               | 42 (20.0%)     | 33 (18.0%)     | 70 (35.0%)  | 0.806            | 0.93 (0.51-1.68) | $1.66 \times 10^{-4}$ | 4.47 (2.05-9.73)  | $2.42 \times 10^{-4}$ | 0.33 (0.18-0.59) |
|            |               | CC               | 6 (2.9%)       | 4 (2.2%)       | 17 (8.5%)   | 0.799            | 0.83 (0.19-3.55) | 0.012                 | 5.86 (1.48-23.16) | 0.001                 | 0.09 (0.02-0.36) |
|            | Additive      | T                | 366 (87.1%)    | 325 (88.8%)    | 296 (74.0%) | Ref              | -                | Ref                   | -                 | Ref                   | -                |
|            |               | C                | 54 (12.9%)     | 41 (11.2%)     | 104 (26.0%) | 0.720            | 0.91 (0.56-1.50) | $1.42 \times 10^{-5}$ | 3.52 (1.99-6.22)  | $9.00 \times 10^{-7}$ | 0.30 (0.18-0.48) |
|            | Dominant      | TT               | 162 (77.1%)    | 146 (79.8%)    | 113 (56.5%) | Ref              | -                | Ref                   | -                 | Ref                   | -                |
|            |               | TC+CC            | 48 (22.9%)     | 37 (20.2%)     | 87 (43.5%)  | 0.747            | 0.91 (0.52-1.59) | $3.61 \times 10^{-5}$ | 4.57 (2.22-9.39)  | $1.09 \times 10^{-5}$ | 0.28 (0.16-0.49) |
|            | Recessive     | TT+TC            | 204 (97.1%)    | 179 (97.8%)    | 183 (91.5%) | Ref              | -                | Ref                   | -                 | Ref                   | -                |
|            |               | CC               | 6 (2.9%)       | 4 (2.2%)       | 17 (8.5%)   | 0.838            | 0.86 (0.20-3.67) | 0.051                 | 3.86 (0.99-14.98) | 0.004                 | 0.15 (0.04-0.56) |
|            | Overdominant  | TT+CC            | 168 (80.0%)    | 150 (82.0%)    | 130 (65.0%) | Ref              | -                | Ref                   | -                 | Ref                   | -                |
|            |               | TC               | 42 (20.0%)     | 33 (18.0%)     | 70 (35.0%)  | 0.798            | 0.93 (0.52-1.66) | 0.001                 | 3.57 (1.72-7.42)  | 0.001                 | 0.38 (0.21-0.68) |

SPSS 16.0 was used to obtain p values after adjusting with age and gender. Significance was maintained at  $\leq 0.05$  after FDR correction. *TEP1*, telomerase associated protein 1; HAPE-f, HAPE-free; HAPE-p, HAPE-patients; HLs, Highlanders; n, number of samples; OR, odds ratio; CI, confidence interval; Ref, reference.

[B] Comparison of genotype and allele distribution in HLs with Han Chinese (CHB+CHS) population and Japanese (JPT) population.

| <i>TEPI</i> |                     |                         |                     |                |                |                  |            |                   |
|-------------|---------------------|-------------------------|---------------------|----------------|----------------|------------------|------------|-------------------|
| SNP         | Genotype/<br>Allele | CHB+CHS<br>(Ref, n=204) | JPT<br>(Ref, n=104) | HLs<br>(n=200) | HLs vs CHB+CHS |                  | HLs vs JPT |                   |
|             |                     |                         |                     |                | p value        | OR (95%CI)       | p value    | OR (95%CI)        |
| rs2104978   | AA                  | 208 (100%)              | 104 (100%)          | 192 (96.0%)    | Ref            | -                | Ref        | -                 |
|             | AG                  | 0 (0%)                  | 0 (0%)              | 3 (1.5%)       | *              | -                | *          | -                 |
|             | GG                  | 0 (0%)                  | 0 (0%)              | 5 (2.5%)       | *              | -                | *          | -                 |
|             | A                   | 416 (100.0%)            | 208 (100.0%)        | 387 (96.8%)    | Ref            | -                | Ref        | -                 |
| rs1713449   | G                   | 0 (0.0%)                | 0 (0.0%)            | 13 (3.3%)      | *              | -                | *          | -                 |
|             | CC                  | 86 (41.3%)              | 61 (58.7%)          | 99 (49.5%)     | Ref            | -                | Ref        | -                 |
|             | CT                  | 102 (49.0%)             | 37 (35.6%)          | 69 (34.5%)     | 0.013          | 0.59 (0.39-0.90) | 0.594      | 1.15 (0.69-1.92)  |
|             | TT                  | 20 (9.6%)               | 6 (5.8%)            | 32 (16.0%)     | 0.304          | 1.39 (0.74-2.61) | 0.009      | 3.29 (1.30-8.32)  |
| rs2228041   | C                   | 274 (65.9%)             | 159 (76.4%)         | 267 (66.8%)    | Ref            | -                | Ref        | -                 |
|             | T                   | 142 (34.1%)             | 49 (23.6%)          | 133 (33.3%)    | 0.789          | 0.96 (0.72-1.29) | 0.013      | 1.62 (1.10-2.37)  |
|             | GG                  | 208 (100%)              | 104 (100%)          | 192 (96.0%)    | Ref            | -                | Ref        | -                 |
|             | GA                  | 0 (0%)                  | 0 (0%)              | 6 (3.0%)       | *              | -                | *          | -                 |
| rs2228036   | AA                  | 0 (0%)                  | 0 (0%)              | 2 (1.0%)       | *              | -                | *          | -                 |
|             | G                   | 416 (100.0%)            | 208 (100.0%)        | 390 (97.5%)    | Ref            | -                | Ref        | -                 |
|             | A                   | 0 (0.0%)                | 0 (0.0%)            | 10 (2.5%)      | *              | -                | *          | -                 |
|             | GG                  | 153 (73.6%)             | 69 (66.3%)          | 127 (63.5%)    | Ref            | -                | Ref        | -                 |
| rs2228036   | GT                  | 55 (26.4%)              | 32 (30.8%)          | 57 (28.5%)     | 0.321          | 1.25 (0.81-1.94) | 1.000      | 0.97 (0.57-1.63)  |
|             | TT                  | 0 (0.0%)                | 3 (2.9%)            | 16 (8.0%)      | *              | -                | 0.125      | 2.90 (0.82-10.29) |
|             | G                   | 361 (86.8%)             | 170 (81.7%)         | 311 (77.8%)    | Ref            | -                | Ref        | -                 |
|             | T                   | 55 (13.2%)              | 38 (18.3%)          | 89 (22.3%)     | 0.001          | 1.88 (1.30-2.72) | 0.252      | 1.28 (0.84-1.96)  |

| SNP       | Genotype/<br>Allele | CHB+CHS<br>(Ref, n=204) | JPT<br>(Ref, n=104) | HLs<br>(n=200) | HLs vs CHB+CHS        |                   | HLs vs JPT            |                    |
|-----------|---------------------|-------------------------|---------------------|----------------|-----------------------|-------------------|-----------------------|--------------------|
|           |                     |                         |                     |                | p value               | OR (95%CI)        | p value               | OR (95%CI)         |
| rs1760898 | CC                  | 70 (33.7%)              | 49 (47.1%)          | 90 (45.0%)     | Ref                   | -                 | Ref                   | -                  |
|           | CA                  | 101 (48.6%)             | 43 (41.3%)          | 88 (44.0%)     | 0.071                 | 0.68 (0.44-1.04)  | 0.674                 | 1.11 (0.67-1.84)   |
|           | AA                  | 37 (17.8%)              | 12 (11.5%)          | 22 (11.0%)     | 0.013                 | 0.46 (0.25-0.85)  | 1.000                 | 1.00 (0.46-2.19)   |
|           | C                   | 241 (57.9%)             | 141 (67.8%)         | 268 (67.0%)    | Ref                   | -                 | Ref                   | -                  |
|           | A                   | 175 (42.1%)             | 67 (32.2%)          | 132 (33.0%)    | 0.008                 | 0.68 (0.51-0.90)  | 0.844                 | 1.04 (0.73-1.48)   |
| rs1760897 | TT                  | 129 (62.0%)             | 71 (68.3%)          | 73 (36.5%)     | Ref                   | -                 | Ref                   | -                  |
|           | TC                  | 69 (33.2%)              | 31 (29.8%)          | 90 (45.0%)     | $1.05 \times 10^{-4}$ | 2.30 (1.51-3.53)  | $7.90 \times 10^{-5}$ | 2.82 (1.67-4.76)   |
|           | CC                  | 10 (4.8%)               | 2 (1.9%)            | 37 (18.5%)     | <0.000001             | 6.54 (3.07-13.91) | $1.00 \times 10^{-6}$ | 17.99 (4.18-77.47) |
|           | T                   | 327 (78.6%)             | 173 (83.2%)         | 236 (59.0%)    | Ref                   | -                 | Ref                   | -                  |
|           | C                   | 89 (21.4%)              | 35 (16.8%)          | 164 (41.0%)    | <0.000001             | 2.55 (1.88-3.47)  | <0.000001             | 3.43 (2.27-5.20)   |
| rs2184282 | AA                  | 120 (57.7%)             | 65 (62.5%)          | 97 (48.5%)     | Ref                   | -                 | Ref                   | -                  |
|           | AG                  | 76 (36.5%)              | 33 (31.7%)          | 69 (34.5%)     | 0.589                 | 0.89 (0.58-1.36)  | 0.203                 | 1.40 (0.83-2.36)   |
|           | GG                  | 12 (5.8%)               | 6 (5.8%)            | 34 (17.0%)     | $3.19 \times 10^{-4}$ | 3.51 (1.72-7.13)  | 0.003                 | 3.80 (1.51-9.56)   |
|           | A                   | 316 (76.0%)             | 163 (78.4%)         | 263 (65.8%)    | Ref                   | -                 | Ref                   | -                  |
|           | G                   | 100 (24.0%)             | 45 (21.6%)          | 137 (34.3%)    | 0.001                 | 1.65 (1.21-2.23)  | 0.001                 | 1.89 (1.28-2.79)   |
| rs4246977 | TT                  | 90 (43.3%)              | 51 (49.0%)          | 127 (63.5%)    | Ref                   | -                 | Ref                   | -                  |
|           | TC                  | 98 (47.1%)              | 45 (43.3%)          | 60 (30.0%)     | $8.50 \times 10^{-5}$ | 0.43 (0.29-0.66)  | 0.015                 | 0.54 (0.32-0.89)   |
|           | CC                  | 20 (9.6%)               | 8 (7.7%)            | 13 (6.5%)      | 0.039                 | 0.46 (0.22-0.97)  | 0.370                 | 0.65 (0.26-1.67)   |
|           | T                   | 278 (66.8%)             | 147 (70.7%)         | 314 (78.5%)    | Ref                   | -                 | Ref                   | -                  |
|           | C                   | 138 (33.2%)             | 61 (29.3%)          | 86 (21.5%)     | $1.88 \times 10^{-4}$ | 0.55 (0.40-0.76)  | 0.032                 | 0.66 (0.45-0.97)   |

| SNP        | Genotype/<br>Allele | CHB+CHS<br>(Ref, n=204) | JPT<br>(Ref, n=104) | HLs<br>(n=200) | HLs vs CHB+CHS |                  | HLs vs JPT |                  |
|------------|---------------------|-------------------------|---------------------|----------------|----------------|------------------|------------|------------------|
|            |                     |                         |                     |                | p value        | OR (95%CI)       | p value    | OR (95%CI)       |
| rs75932631 | TT                  | 131 (63.0%)             | 67 (64.4%)          | 113 (56.5%)    | Ref            | -                | Ref        | -                |
|            | TC                  | 68 (32.7%)              | 33 (31.7%)          | 70 (35.0%)     | 0.407          | 1.19 (0.79-1.81) | 0.380      | 1.26 (0.75-2.10) |
|            | CC                  | 9 (4.3%)                | 4 (3.8%)            | 17 (8.5%)      | 0.064          | 2.19 (0.94-5.10) | 0.146      | 2.52 (0.81-7.80) |
|            | T                   | 330 (79.3%)             | 167 (80.3%)         | 296 (74.0%)    | Ref            | -                | Ref        | -                |
|            | C                   | 86 (20.7%)              | 41 (19.7%)          | 104 (26.0%)    | 0.072          | 1.35 (0.97-1.87) | 0.084      | 1.43 (0.95-2.15) |

SISA online tool was used to obtain p values. Significance was maintained at  $\leq 0.05$  after FDR correction. \*Analysis could not be performed because the representatives of an allele were absent in a study group. *TEPI*, telomerase associated protein 1; CHB+CHS, Han Chinese population comprising of Han Chinese in Beijing (CHB) and Southern Han Chinese (CHS); JPT, Japanese population; HLs, highlanders; Ref, reference; n, number of samples; OR, odds ratio; CI, confidence interval.

Supplementary Table S12: Genotype and allele distribution of *HSP90AA1* SNP

[A] Comparison of genotype and allele distribution among HAPE-f, HAPE-p and HLs.

| <i>HSP90AA1</i> |               |                   |                |                |             |                  |                  |               |                   |               |                   |
|-----------------|---------------|-------------------|----------------|----------------|-------------|------------------|------------------|---------------|-------------------|---------------|-------------------|
| SNP             | Genetic Model | Genotype / Allele | HAPE-f (n=210) | HAPE-p (n=183) | HLs (n=200) | HAPE-p vs HAPE-f |                  | HLs vs HAPE-f |                   | HAPE-p vs HLs |                   |
|                 |               |                   |                |                |             | p value          | OR (95%CI)       | p value       | OR (95%CI)        | p value       | OR (95%CI)        |
| rs8005905       | Codominant    | AA                | 166 (79.0%)    | 143 (78.1%)    | 137 (68.5%) | Ref              | -                | Ref           | -                 | Ref           | -                 |
|                 |               | AT                | 38 (18.1%)     | 36 (19.7%)     | 61 (30.5%)  | 0.976            | 1.01 (0.56-1.82) | 0.681         | 0.84 (0.36-1.95)  | 0.374         | 0.77 (0.43-1.38)  |
|                 |               | TT                | 6 (2.9%)       | 4 (2.2%)       | 2 (1.0%)    | 0.988            | 1.01 (0.23-4.37) | 0.001         | 0.01 (0.001-0.16) | 0.553         | 1.93 (0.22-16.96) |
|                 | Additive      | A                 | 370 (88.1%)    | 322 (88.0%)    | 335 (83.8%) | Ref              | -                | Ref           | -                 | Ref           | -                 |
|                 |               | T                 | 50 (11.9%)     | 44 (12.0%)     | 65 (16.2%)  | 0.993            | 1.00 (0.61-1.65) | 0.198         | 0.61 (0.29-1.29)  | 0.625         | 0.88 (0.52-1.48)  |
|                 | Dominant      | AA                | 166 (79.0%)    | 143 (78.1%)    | 137 (68.5%) | Ref              | -                | Ref           | -                 | Ref           | -                 |
|                 |               | AT+TT             | 44 (21.0%)     | 40 (21.9%)     | 63 (31.5%)  | 0.992            | 1.00 (0.58-1.75) | 0.413         | 0.71 (0.32-1.61)  | 0.472         | 0.81 (0.45-1.44)  |
|                 | Recessive     | AA+AT             | 204 (97.1%)    | 179 (97.8%)    | 198 (99.0%) | Ref              | -                | Ref           | -                 | Ref           | -                 |
|                 |               | TT                | 6 (2.9%)       | 4 (2.2%)       | 2 (1.0%)    | 0.999            | 1.00 (0.23-4.27) | 0.001         | 0.01 (0.001-0.15) | 0.518         | 2.14 (0.21-21.35) |
|                 | Overdominant  | AA+TT             | 172 (81.9%)    | 147 (80.3%)    | 139 (69.5%) | Ref              | -                | Ref           | -                 | Ref           | -                 |
|                 |               | AT                | 38 (18.1%)     | 36 (19.7%)     | 61 (30.5%)  | 0.991            | 1.00 (0.56-1.80) | 0.817         | 0.91 (0.40-2.06)  | 0.362         | 0.76 (0.42-1.37)  |

SPSS 16.0 was used to obtain p values after adjusting with age and gender. Significance was maintained at  $\leq 0.05$  after FDR correction. *HSP90AA1*, heat shock protein 90; HAPE-f, HAPE-free; HAPE-p, HAPE-patients; HLs, Highlanders; n, number of samples; OR, odds ratio; CI, confidence interval; Ref, reference.



[B] Comparison of genotype and allele distribution in HLs with Han Chinese (CHB+CHS) population and Japanese (JPT) population.

| <i>HSP90A1</i> |                     |                           |                           |                           |                |                       |              |                       |
|----------------|---------------------|---------------------------|---------------------------|---------------------------|----------------|-----------------------|--------------|-----------------------|
| SNP            | Genotype/<br>Allele | CHB+CHS<br>(Ref, n=204)   | JPT<br>(Ref, n=104)       | HLs<br>(n=200)            | HLs vs CHB+CHS |                       | HLs vs JPT   |                       |
|                |                     |                           |                           |                           | p value        | OR (95%CI)            | p value      | OR (95%CI)            |
| rs8005905      | AA                  | 134 (64.4%)               | 66 (63.5%)                | 137 (68.5%)               | Ref            | -                     | Ref          | -                     |
|                | AT                  | 64 (30.8%)                | 35 (33.7%)                | 61 (30.5%)                | 0.746          | 0.93 (0.61-1.42)      | 0.501        | 0.84 (0.51-1.40)      |
|                | TT                  | 10 (4.8%)                 | 3 (2.9%)                  | 2 (1.0%)                  | 0.035          | 0.20 (0.04-0.91)      | 0.335        | 0.32 (0.05-1.97)      |
|                | A<br>T              | 332 (79.8%)<br>84 (20.2%) | 167 (80.3%)<br>41 (19.7%) | 335 (83.8%)<br>65 (16.3%) | Ref<br>0.145   | -<br>0.77 (0.54-1.10) | Ref<br>0.286 | -<br>0.79 (0.51-1.22) |

SISA online tool was used to obtain p values. Significance was maintained at  $\leq 0.05$  after FDR correction. *HSP90A1*, heat shock protein 90; CHB+CHS, Han Chinese population comprising of Han Chinese in Beijing (CHB) and Southern Han Chinese (CHS); JPT, Japanese population; HLs, highlanders; Ref, reference; n, number of samples; OR, odds ratio; CI, confidence interval.

Supplementary Table S13: Genotype and allele distribution and comparison of *PTGES3* SNPs in HAPE-f, HAPE-p and HLs

| <i>PTGES3</i> |               |                   |                |                |             |                  |                   |               |                   |               |                   |
|---------------|---------------|-------------------|----------------|----------------|-------------|------------------|-------------------|---------------|-------------------|---------------|-------------------|
| SNP           | Genetic Model | Genotype / Allele | HAPE-f (n=210) | HAPE-p (n=183) | HLs (n=200) | HAPE-p vs HAPE-f |                   | HLs vs HAPE-f |                   | HAPE-p vs HLs |                   |
|               |               |                   |                |                |             | p value          | OR (95%CI)        | p value       | OR (95%CI)        | p value       | OR (95%CI)        |
| rs191628793   | Codominant    | AA                | 197 (93.8%)    | 165 (90.2%)    | 190 (95.0%) | Ref              | -                 | Ref           | -                 | Ref           | -                 |
|               |               | AC                | 11 (5.2%)      | 11 (6.0%)      | 5 (2.5%)    | 0.971            | 0.98 (0.35-2.75)  | 0.009         | 0.08 (0.01-0.54)  | 0.157         | 2.64 (0.69-10.12) |
|               |               | CC                | 2 (1.0%)       | 7 (3.8%)       | 5 (2.5%)    | 0.322            | 2.42 (0.42-13.98) | 0.165         | 4.57 (0.53-38.97) | 0.740         | 1.27 (0.31-5.29)  |
|               | Additive      | A                 | 405 (96.4%)    | 341 (93.2%)    | 385 (96.3%) | Ref              | -                 | Ref           | -                 | Ref           | -                 |
|               |               | C                 | 15 (3.6%)      | 25 (6.8%)      | 15 (3.8%)   | 0.324            | 1.47 (0.69-3.13)  | 0.974         | 0.98 (0.28-3.37)  | 0.232         | 1.64 (0.73-3.70)  |
|               | Dominant      | AA                | 197 (93.8%)    | 165 (90.2%)    | 190 (95.0%) | Ref              | -                 | Ref           | -                 | Ref           | -                 |
|               |               | AC+CC             | 13 (6.2%)      | 18 (9.8%)      | 10 (5.0%)   | 0.589            | 1.27 (0.53-3.03)  | 0.329         | 0.46 (0.09-2.21)  | 0.207         | 1.90 (0.70-5.15)  |
|               | Recessive     | AA+AC             | 208 (99.0%)    | 176 (96.2%)    | 195 (97.5%) | Ref              | -                 | Ref           | -                 | Ref           | -                 |
|               |               | CC                | 2 (1.0%)       | 7 (3.8%)       | 5 (2.5%)    | 0.295            | 2.50 (0.45-13.98) | 0.160         | 4.47 (0.55-36.20) | 0.779         | 1.23 (0.30-5.08)  |
|               | Overdominant  | AA+CC             | 199 (94.8%)    | 172 (94.0%)    | 195 (97.5%) | Ref              | -                 | Ref           | -                 | Ref           | -                 |
|               |               | AC                | 11 (5.2%)      | 11 (6.0%)      | 5 (2.5%)    | 0.939            | 0.96 (0.34-2.69)  | 0.009         | 0.08 (0.01-0.54)  | 0.158         | 2.63 (0.69-10.02) |

SPSS 16.0 was used to obtain p values after adjusting with age and gender. Significance was maintained at  $\leq 0.05$  after FDR correction. *PTGES3*, Prostaglandin E Synthase 3; HAPE-f, HAPE-free; HAPE-p, HAPE-patients; HLs, Highlanders; n, number of samples; OR, odds ratio; CI, confidence interval; Ref, reference.

Note: The genotype data for P23 rs191628793A/C in CHB+CHS and JPT populations were unavailable.

Supplementary Table S14: Correlation analysis between biomarkers and clinical parameters in the three study groups

| HAPE-f                             |                          |                       |                       |                       |                                       |
|------------------------------------|--------------------------|-----------------------|-----------------------|-----------------------|---------------------------------------|
| Clinical parameters/<br>Biomarkers | Relative telomere length | Telomerase Activity   | TERT                  | 8-iso PGF2 $\alpha$   | Total antioxidant activity            |
| MAP                                | r = -0.003<br>p = 0.97   | r = 0.02<br>p = 0.81  | r = -0.04<br>p = 0.71 | r = 0.07<br>p = 0.35  | r = 0.10<br>p = 0.37                  |
| SaO <sub>2</sub>                   | r = -0.04<br>p = 0.59    | r = 0.05<br>p = 0.59  | r = -0.09<br>p = 0.46 | r = -0.15<br>p = 0.05 | r = 0.09<br>p = 0.44                  |
| HAPE-p                             |                          |                       |                       |                       |                                       |
| Clinical parameters/<br>Biomarkers | Relative telomere length | Telomerase Activity   | TERT                  | 8-iso PGF2 $\alpha$   | Total antioxidant activity            |
| MAP                                | r = -0.05<br>p = 0.52    | r = -0.06<br>p = 0.57 | r = 0.21<br>p = 0.10  | r = -0.03<br>p = 0.80 | r = -0.22<br>p = 0.08                 |
| SaO <sub>2</sub>                   | r = -0.02<br>p = 0.77    | r = -0.23<br>p = 0.02 | r = 0.14<br>p = 0.27  | r = 0.07<br>p = 0.46  | r = 0.19<br>p = 0.13                  |
| HLs                                |                          |                       |                       |                       |                                       |
| Clinical parameters/<br>Biomarkers | Relative telomere length | Telomerase Activity   | TERT                  | 8-iso PGF2 $\alpha$   | Total antioxidant activity            |
| MAP                                | r = 0.09<br>p = 0.20     | r = 0.09<br>p = 0.26  | r = -0.07<br>p = 0.40 | r = 0.05<br>p = 0.48  | r = -0.25<br>p = 0.003                |
| SaO <sub>2</sub>                   | r = 0.08<br>p = 0.30     | r = 0.10<br>p = 0.22  | r = 0.13<br>p = 0.11  | r = -0.08<br>p = 0.31 | r = 0.33<br>p = 5.35 $\times 10^{-5}$ |

SPSS 16.0 was used to obtain p values and the significance was maintained at  $p \leq 0.05$  after Bonferroni's correction. P values were obtained after adjusting with age, gender, and BMI. HAPE-f, HAPE-free; HAPE-p, HAPE-patients; HLs, Highlanders; MAP, Mean arterial pressure; SaO<sub>2</sub>, arterial oxygen saturation; TERT, Telomerase reverse transcriptase; 8-iso PGF2 $\alpha$ , 8-isoprostaglandin F2 $\alpha$ ; r, correlation coefficient; p, p value.

Supplementary Table S15: Correlation analysis between the biomarkers in the three study groups

**(A) HAPE-f**

|                                      |                                 |                            |                        |                                      |                                   |
|--------------------------------------|---------------------------------|----------------------------|------------------------|--------------------------------------|-----------------------------------|
| <b>Relative telomere length</b>      | r = 1                           |                            |                        |                                      |                                   |
| <b>Telomerase Activity</b>           | r = -0.01<br>p = 0.92           | r = 1                      |                        |                                      |                                   |
| <b>TERT</b>                          | r = -0.15<br>p = 0.24           | r = 0.15<br>p = 0.23       | r = 1                  |                                      |                                   |
| <b>8-iso PGF2<math>\alpha</math></b> | r = 0.15<br>p = 0.05            | r = 0.17<br>p = 0.06       | r = -0.01<br>p = 0.96  | r = 1                                |                                   |
| <b>Total antioxidant activity</b>    | r = -0.03<br>p = 0.77           | r = -0.22<br>p = 0.09      | r = -0.34<br>p = 0.002 | r = 0.03<br>p = 0.80                 | r = 1                             |
| <b>Biomarkers</b>                    | <b>Relative telomere length</b> | <b>Telomerase Activity</b> | <b>TERT</b>            | <b>8-iso PGF2<math>\alpha</math></b> | <b>Total antioxidant activity</b> |

**(B) HAPE-p**

|                                      |                                 |                            |                       |                                      |                                   |
|--------------------------------------|---------------------------------|----------------------------|-----------------------|--------------------------------------|-----------------------------------|
| <b>Relative telomere length</b>      | r = 1                           |                            |                       |                                      |                                   |
| <b>Telomerase Activity</b>           | r = 0.09<br>p = 0.35            | r = 1                      |                       |                                      |                                   |
| <b>TERT</b>                          | r = -0.14<br>p = 0.27           | r = 0.09<br>p = 0.46       | r = 1                 |                                      |                                   |
| <b>8-iso PGF2<math>\alpha</math></b> | r = -0.03<br>p = 0.80           | r = 0.04<br>p = 0.77       | r = -0.24<br>p = 0.06 | r = 1                                |                                   |
| <b>Total antioxidant activity</b>    | r = -0.03<br>p = 0.81           | r = 0.24<br>p = 0.06       | r = 0.35<br>p = 0.004 | r = 0.09<br>p = 0.49                 | r = 1                             |
| <b>Biomarkers</b>                    | <b>Relative telomere length</b> | <b>Telomerase Activity</b> | <b>TERT</b>           | <b>8-iso PGF2<math>\alpha</math></b> | <b>Total antioxidant activity</b> |

---

**(C) HLs**

|                                      |                                 |                            |                      |                                      |                                   |
|--------------------------------------|---------------------------------|----------------------------|----------------------|--------------------------------------|-----------------------------------|
| <b>Relative telomere length</b>      | r = 1                           |                            |                      |                                      |                                   |
| <b>Telomerase Activity</b>           | r = -0.05<br>p = 0.49           | r = 1                      |                      |                                      |                                   |
| <b>TERT</b>                          | r = 0.02<br>p = 0.83            | r = -0.15<br>p = 0.07      | r = 1                |                                      |                                   |
| <b>8-iso PGF2<math>\alpha</math></b> | r = 0.03<br>p = 0.68            | r = -0.05<br>p = 0.49      | r = 0.02<br>p = 0.81 | r = 1                                |                                   |
| <b>Total antioxidant activity</b>    | r = -0.05<br>p = 0.53           | r = 0.03<br>p = 0.68       | r = 0.10<br>p = 0.25 | r = -0.23<br>p = 0.005               | r = 1                             |
| <b>Biomarkers</b>                    | <b>Relative telomere length</b> | <b>Telomerase Activity</b> | <b>TERT</b>          | <b>8-iso PGF2<math>\alpha</math></b> | <b>Total antioxidant activity</b> |

SPSS 16.0 was used to obtain p values, and the significance was maintained at  $p \leq 0.05$  after Bonferroni's correction. P values were obtained after adjusting with age, gender and BMI. HAPE-f, HAPE-free; HAPE-p, HAPE-patients; HLs, Highlanders; TERT, Telomerase reverse transcriptase; 8-iso PGF2 $\alpha$ . 8-isoprostaglandin F2 $\alpha$ ; r, correlation coefficient; p, p-value.
